# Supplementary material for: A DFT study on the Pd-mediated decarboxylation process of aryl carboxylic acids
Source: Royal Society of Chemistry journal article supplement (doi:10.1039/c0dt00491j), 2010-01-01
Supplement: c0dt00491j.pdf [file c0dt00491j.pdf]

## A DFT study on the Pd-Mediated Decarboxylation Process of Aryl Carboxylic Acids

Liqin Xue,<sup>a</sup> Weiping Su<sup>\*b</sup> and Zhenyang Lin<sup>\*a</sup>

<sup>a</sup> Department of Chemistry, The Hong Kong University of Science and Technology, Clear Water Bay, Kowloon, Hong Kong, China. Fax: +852 23587361; Tel: +852 2358 7379; E-mail: chzlin@ust.hk

<sup>b</sup> State Key Laboratory of Structural Chemistry, Fujian Institute of Research on the Structure of Matter, Chinese Academy of Sciences, Fuzhou, Fujian 350002, China. Tel: +86-591-8377 1575; E-mail: wpsu@fjirsm.ac.cn

### Electronic Supplementary Information

#### Table of Contents

|                                                             |    |
|-------------------------------------------------------------|----|
| Summary of Additional Computational Results .....           | S1 |
| Results of calculations that include solvation effects..... | S7 |
| Cartesian coordinates and electronic energies.....          | S9 |

## Summary of Additional Computational Results

### A. B3PW91 versus B3LYP

Scheme S1 shows the relative stability of the three DMSO linkage isomers (**1OS**, **1OO** and **1SS**) of *trans*-Pd(OOCCF<sub>3</sub>)<sub>2</sub>(DMSO)<sub>2</sub> at both the B3PW91 and B3LYP levels. As we mentioned in the text, the isomer **1OS** was the one characterized by single crystal X-ray diffraction studies in experiment. Therefore, we feel that the results from the B3PW91 method are more reasonable in the prediction of the relative stability.

#### Scheme S1

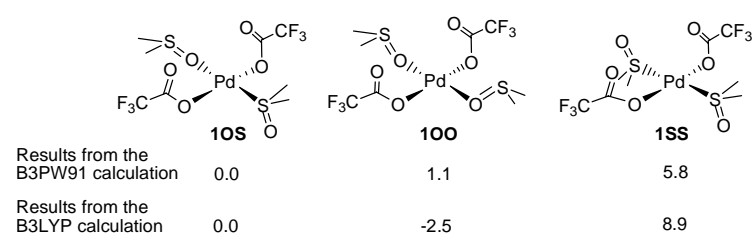

The calculated relative free energies in the gas phase are given in kcal/mol.

### B. Other less favorable pathways are listed here.

#### i. Pathways in which the OOCCF<sub>3</sub><sup>-</sup> ligand is just a spectator ligand.

**Fig. S1a** is Fig. 1 discussed in the main text. It is again presented here for the purpose of comparison.

**Fig. S1b** shows the energy profile calculated for a direct conversion from **4** to **5** by rotating the phenyl carboxylate ligand around one of the two C-O bonds.

**Fig. S1c** shows the energy profile calculated for a similar direct conversion by rotating the phenyl carboxylate ligand around the other C-O bond in **4** leading to **8**, an isomer of **5**.

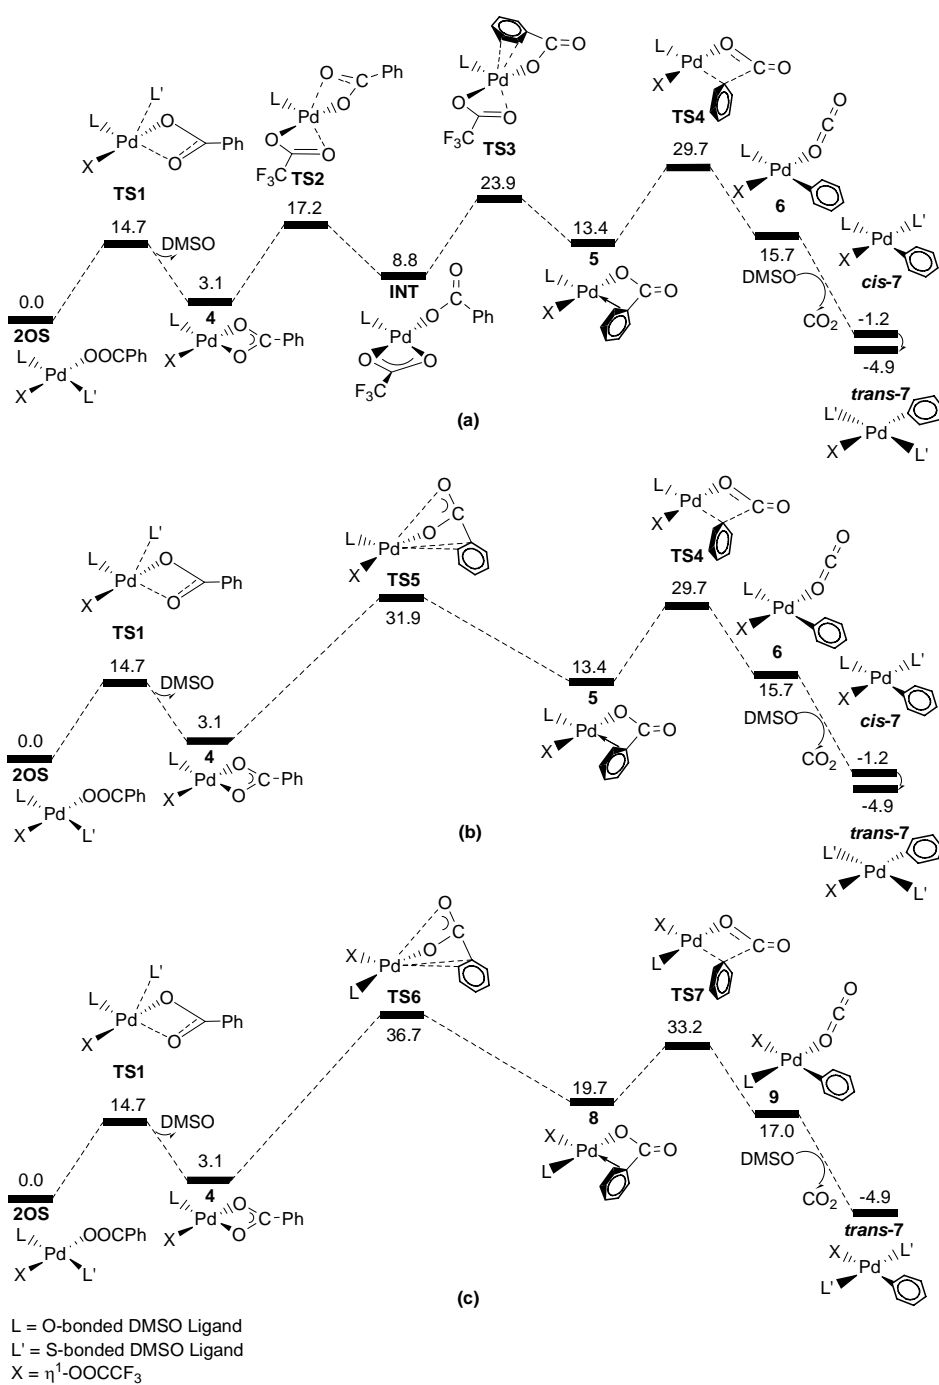

**Fig. S1.** Energy profiles calculated for various possible pathways for the conversion of **2OS** → **trans-7**. The calculated relative free energies in the gas phase are given in kcal/mol.

## ii. Pathway that involves dissociation of the O-bonded DMSO ligand

The most favorable pathway discussed in the main text involves dissociation of the S-bonded DMSO ligand as the first step. Fig. S2 shows the possible pathway that involves dissociation of the O-bonded DMSO ligand as the first step.

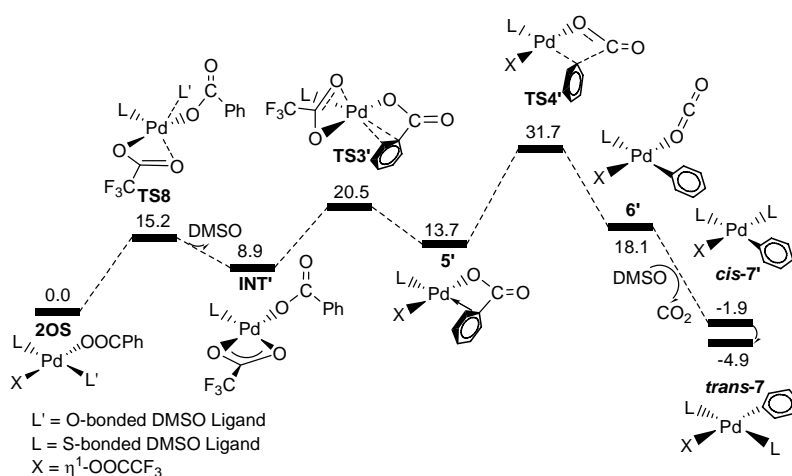

**Fig. S2** Energy profile calculated for reaction of **2OS**  $\rightarrow$  **trans-7** via the O-bonded DMSO ligand dissociation as the first step. The calculated relative free energies in the gas phase are given in kcal/mol.

## C. Barriers calculated for insertion of styrene into a Pd-Ar<sub>R</sub> bond (R = OMe, NO<sub>2</sub>)

The OMe and NO<sub>2</sub> substituents when they are in an *ortho* position have a significant effect to lower the decarboxylation barriers. For these two substituted systems, we examined the possibility of their styrene insertion steps, which are immediately followed their decarboxylation steps, becoming rate-determining in the catalytic cycle. The calculated results were presented in Fig. S3. For each system, there are two possible pathways starting from **10R** and **11R** in consideration of the different possible styrene coordination isomers. When we take **trans-7<sub>R</sub>** as the energy reference point, the overall barriers calculated for the styrene insertion are much lower than those of the decarboxylation steps.

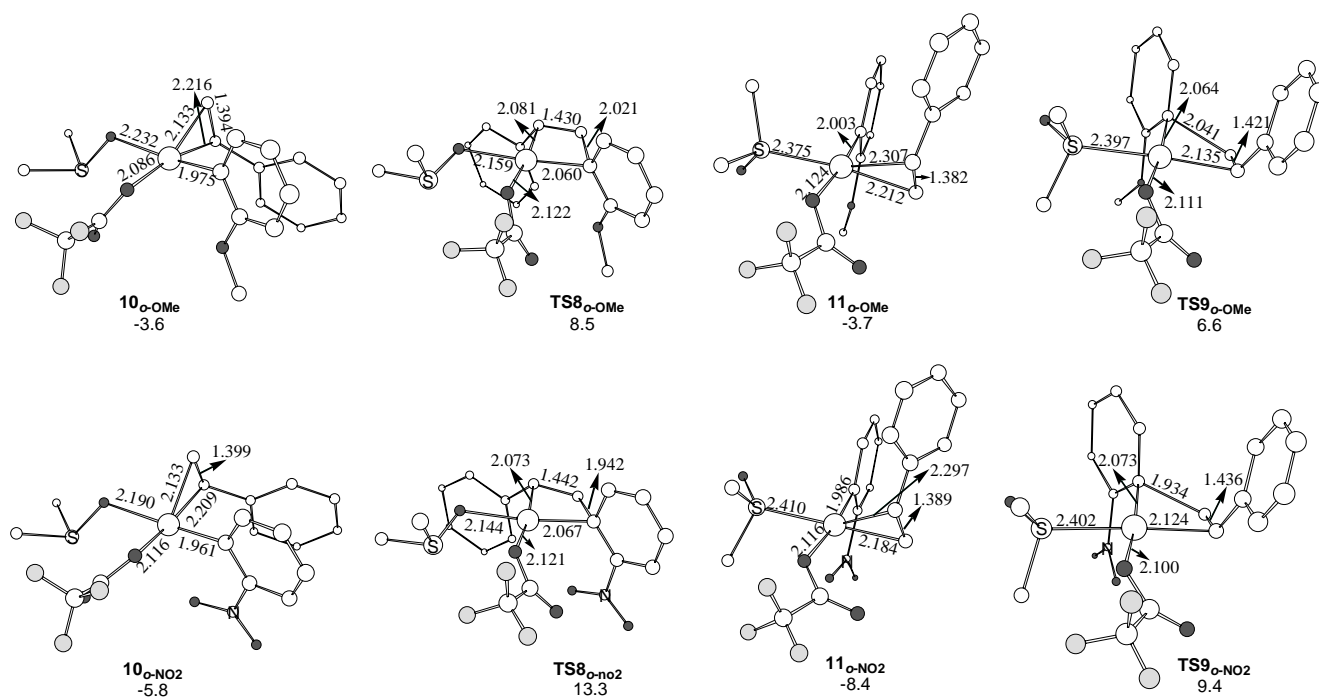

**Fig. S3** The calculated relative free energies in the gas phase are given in kcal/mol and the selected bond distances (Å) calculated for **10<sub>o</sub>-OMe**, **TS8<sub>o</sub>-OMe**, **11<sub>o</sub>-OMe**, **TS9<sub>o</sub>-OMe**, **10<sub>o</sub>-NO2**, **TS8<sub>o</sub>-OMe**, **11<sub>o</sub>-NO2** and **TS9<sub>o</sub>-NO2**. For clarity, the hydrogen atoms associated with the phenyl rings and the methyl groups were omitted. The dark spheres represent oxygen atoms and the grey sphere represent fluorine atoms. In calculating the relative energies, we included the energies calculated for free styrene, DMSO and CO<sub>2</sub> whenever necessary in order to make the energies comparable for all the species.

#### D. Basis set effect

Examining the basis set dependence, we also performed single-point energy calculations with a much larger basis set. Table S1 gives the calculated results. The results suggest that the conclusions made in the main text should be valid with the use of the basis set chosen for this study.

**Table S1.** Computed relative electronic energies and single point relative electronic energies (kcal/mol) in the gas phase for selected structures.<sup>a</sup>

|                  | $\Delta E$ | $\Delta E_{sp}$ |
|------------------|------------|-----------------|
| <b>2OS</b>       | 0.0        | 0.0             |
| <b>TS2+ DMSO</b> | 32.1       | 31.3            |
| <b>TS3+ DMSO</b> | 38.2       | 36.6            |
| <b>TS4+ DMSO</b> | 46.1       | 43.6            |

<sup>a</sup> Single point energy calculations were carried out based on the optimized structures calculated with the lower basis set (6-31G\* for C, H and O, 6-31G+\* for S and SDDAll for Pd). The large basis set we selected is SDDAll for Pd and 6-311+G(2d, p) for the others.

## Results of calculations that include solvation effects

**Table S2.** Computed relative free energies and relative electronic energies (kcal/mol) in the gas phase and in DMF for selected steps that are crucial.

$$\Delta G_{\text{sol}} = \Delta E_{\text{sol}} + (\Delta G - \Delta E)$$

|                                                                          | Gas Phase  |            | In DMF                  |                         |
|--------------------------------------------------------------------------|------------|------------|-------------------------|-------------------------|
|                                                                          | $\Delta E$ | $\Delta G$ | $\Delta E_{\text{sol}}$ | $\Delta G_{\text{sol}}$ |
| <b>2OS</b>                                                               | 0.0        | 0.0        | 0.0                     | 0.0                     |
| <b>TS4 + DMSO</b>                                                        | 46.1       | 29.7       | 43.7                    | 27.3                    |
| <b><i>trans</i>-7 + CO<sub>2</sub></b>                                   | 7.0        | -4.9       | 6.2                     | -5.7                    |
| <b>2OS<sub><i>o</i>-OMe</sub></b>                                        | 0.0        | 0.0        | 0.0                     | 0.0                     |
| <b>TS4<sub><i>o</i>-OMe</sub> + DMSO</b>                                 | 38.1       | 22.0       | 37.2                    | 21.1                    |
| <b><i>trans</i>-7<sub><i>o</i>-OMe</sub> + CO<sub>2</sub></b>            | 3.3        | -8.6       | 2.0                     | -9.9                    |
| <b>2OS<sub><i>p</i>-OMe</sub></b>                                        | 0.0        | 0.0        | 0.0                     | 0.0                     |
| <b>TS4<sub><i>p</i>-OMe</sub> + DMSO</b>                                 | 43.4       | 26.9       | 41.8                    | 25.3                    |
| <b><i>trans</i>-7<sub><i>p</i>-OMe</sub> + CO<sub>2</sub></b>            | 10.6       | -1.2       | 8.4                     | -3.4                    |
| <b>2OS<sub><i>m</i>-OMe</sub></b>                                        | 0.0        | 0.0        | 0.0                     | 0.0                     |
| <b>TS4<sub><i>m</i>-OMe</sub> + DMSO</b>                                 | 46.0       | 29.8       | 44.0                    | 27.8                    |
| <b><i>trans</i>-7<sub><i>m</i>-OMe</sub> + CO<sub>2</sub></b>            | 8.1        | -3.5       | 6.5                     | -5.1                    |
| <b>2OS<sub><i>o</i>-NO<sub>2</sub></sub></b>                             | 0.0        | 0.0        | 0.0                     | 0.0                     |
| <b>TS4<sub><i>o</i>-NO<sub>2</sub></sub> + DMSO</b>                      | 44.9       | 28.1       | 41.8                    | 25.0                    |
| <b><i>trans</i>-7<sub><i>o</i>-NO<sub>2</sub></sub> + CO<sub>2</sub></b> | 2.7        | -9.4       | -0.3                    | -12.4                   |
| <b>2OS<sub><i>p</i>-NO<sub>2</sub></sub></b>                             | 0.0        | 0.0        | 0.0                     | 0.0                     |
| <b>TS4<sub><i>p</i>-NO<sub>2</sub></sub> + DMSO</b>                      | 49.3       | 33.1       | 47.0                    | 30.7                    |
| <b><i>trans</i>-7<sub><i>p</i>-NO<sub>2</sub></sub> + CO<sub>2</sub></b> | 8.8        | -2.9       | 5.5                     | -6.2                    |
| <b>2OS<sub><i>m</i>-NO<sub>2</sub></sub></b>                             | 0.0        | 0.0        | 0.0                     | 0.0                     |
| <b>TS4<sub><i>m</i>-NO<sub>2</sub></sub> + DMSO</b>                      | 48.6       | 32.5       | 46.4                    | 30.3                    |

|                                                              |      |      |      |      |
|--------------------------------------------------------------|------|------|------|------|
| <i>trans-7</i> <sub>m-NO<sub>2</sub></sub> + CO <sub>2</sub> | 8.7  | -3.0 | 6.4  | -5.3 |
| <b>2OS</b> <sub>o-Me</sub>                                   | 0.0  | 0.0  | 0.0  | 0.0  |
| <b>TS4</b> <sub>o-Me</sub> + DMSO                            | 42.0 | 25.9 | 40.0 | 23.9 |
| <i>trans-7</i> <sub>o-Me</sub> + CO <sub>2</sub>             | 7.7  | -4.7 | 3.4  | -9.0 |
| <b>2OS</b> <sub>p-Me</sub>                                   | 0.0  | 0.0  | 0.0  | 0.0  |
| <b>TS4</b> <sub>p-Me</sub> + DMSO                            | 45.0 | 28.7 | 43.4 | 27.1 |
| <i>trans-7</i> <sub>p-Me</sub> + CO <sub>2</sub>             | 9.3  | -2.4 | 9.0  | -2.7 |
| <b>2OS</b> <sub>m-Me</sub>                                   | 0.0  | 0.0  | 0.0  | 0.0  |
| <b>TS4</b> <sub>m-Me</sub> + DMSO                            | 45.5 | 29.9 | 43.5 | 27.9 |
| <i>trans-7</i> <sub>m-Me</sub> + CO <sub>2</sub>             | 9.0  | -1.2 | 7.1  | -3.1 |
| <b>2OS</b> <sub>o-CN</sub>                                   | 0.0  | 0.0  | 0.0  | 0.0  |
| <b>TS4</b> <sub>o-CN</sub> + DMSO                            | 48.3 | 31.3 | 44.5 | 27.5 |
| <i>trans-7</i> <sub>o-CN</sub> + CO <sub>2</sub>             | 6.5  | -6.4 | 3.6  | -9.3 |
| <b>2OS</b> <sub>p-CN</sub>                                   | 0.0  | 0.0  | 0.0  | 0.0  |
| <b>TS4</b> <sub>p-CN</sub> + DMSO                            | 48.7 | 32.4 | 46.3 | 30.0 |
| <i>trans-7</i> <sub>p-CN</sub> + CO <sub>2</sub>             | 9.2  | -2.6 | 6.1  | -5.7 |
| <b>2OS</b> <sub>m-CN</sub>                                   | 0.0  | 0.0  | 0.0  | 0.0  |
| <b>TS4</b> <sub>m-CN</sub> + DMSO                            | 48.8 | 33.1 | 46.3 | 30.6 |
| <i>trans-7</i> <sub>m-CN</sub> + CO <sub>2</sub>             | 9.2  | -2.3 | 6.6  | -4.9 |



### Cartesian coordinates for all the species calculated at the B3PW91 level in this study

#### 10S

E = -2286.194065 a.u.

|    |           |           |           |
|----|-----------|-----------|-----------|
| Pd | 0.042317  | -0.265112 | -0.471024 |
| S  | -0.120003 | -2.493691 | -0.116355 |
| S  | -0.366879 | 2.691765  | 0.155777  |
| F  | 4.647457  | 0.393630  | -1.021000 |
| F  | 4.525728  | -1.213278 | 0.440208  |
| F  | 4.922006  | 0.820886  | 1.087445  |
| F  | -4.849081 | -0.329076 | 1.372206  |
| F  | -4.646730 | -0.341105 | -0.785830 |
| F  | -4.186265 | 1.462215  | 0.339727  |
| O  | 2.059522  | -0.457031 | -0.447812 |
| O  | 0.216042  | 1.744968  | -0.942848 |
| O  | -1.951830 | 0.024019  | -0.546528 |
| O  | -1.364899 | -3.204495 | -0.515768 |
| O  | 2.279064  | 1.132447  | 1.160760  |
| O  | -2.243964 | -0.862999 | 1.520858  |
| C  | 1.276028  | -3.288830 | -0.938984 |
| C  | 0.250306  | -2.826853 | 1.615139  |
| C  | 2.705761  | 0.316979  | 0.358023  |
| C  | 4.230242  | 0.084601  | 0.217164  |
| C  | 0.926996  | 3.931838  | 0.349678  |
| C  | -1.601172 | 3.653756  | -0.743306 |
| C  | -2.628934 | -0.318805 | 0.498745  |
| C  | -4.109278 | 0.107198  | 0.354903  |
| H  | 2.199582  | -2.771646 | -0.673523 |
| H  | 1.281551  | -4.340171 | -0.638504 |
| H  | 1.092863  | -3.206684 | -2.012856 |
| H  | 1.222672  | -2.393629 | 1.863793  |
| H  | -0.548084 | -2.346094 | 2.183007  |
| H  | 0.244056  | -3.911560 | 1.757232  |
| H  | 0.568448  | 4.718862  | 1.020119  |
| H  | 1.773534  | 3.404940  | 0.796010  |
| H  | 1.195910  | 4.337492  | -0.629488 |
| H  | -1.948821 | 4.474242  | -0.107818 |
| H  | -1.165394 | 4.029591  | -1.673096 |
| H  | -2.427342 | 2.972120  | -0.955324 |

#### 10O

E = -2286.191642 a.u.

|    |           |           |           |
|----|-----------|-----------|-----------|
| Pd | -0.000035 | 0.000016  | 0.661523  |
| S  | -0.188682 | -2.745320 | -0.574486 |
| S  | 0.188443  | 2.745381  | -0.574447 |
| F  | -4.666271 | 0.219100  | 1.162266  |
| F  | -4.373943 | -1.241724 | -0.422723 |
| F  | -4.961417 | 0.790422  | -0.907307 |
| O  | -2.008326 | -0.237112 | 0.645411  |
| O  | -0.135006 | 2.029565  | 0.781003  |
| O  | 2.008275  | 0.237102  | 0.645743  |
| O  | 0.134803  | -2.029558 | 0.780980  |
| O  | -2.358108 | 1.276601  | -1.017853 |
| O  | 2.358000  | -1.276394 | -1.017725 |
| C  | -1.664166 | -3.706617 | -0.168170 |
| C  | 1.034597  | -4.067767 | -0.624373 |
| C  | -2.706722 | 0.442901  | -0.190956 |
| C  | -4.204579 | 0.059166  | -0.086708 |
| C  | -1.034800 | 4.067863  | -0.624140 |
| C  | 1.663977  | 3.706620  | -0.168165 |
| C  | 2.706662  | -0.442856 | -0.190682 |
| H  | -1.910483 | -4.361464 | -1.010147 |
| H  | -1.489356 | -4.284692 | 0.743412  |
| H  | -2.467224 | -2.984114 | -0.007293 |
| H  | 0.795546  | -4.741344 | -1.452944 |
| H  | 1.993272  | -3.574963 | -0.796331 |
| H  | 1.030899  | -4.599077 | 0.331269  |
| H  | -0.795788 | 4.741513  | -1.452661 |
| H  | -1.993498 | 3.575098  | -0.796080 |
| H  | -1.031028 | 4.599081  | 0.331553  |
| H  | 1.910335  | 4.361397  | -1.010186 |
| H  | 1.489198  | 4.284766  | 0.743377  |
| H  | 2.466998  | 2.984089  | -0.007228 |
| C  | 4.204546  | -0.059257 | -0.086340 |

|   |          |           |           |
|---|----------|-----------|-----------|
| F | 4.961377 | -0.790627 | -0.906846 |
| F | 4.374053 | 1.241594  | -0.422420 |
| F | 4.666142 | -0.219160 | 1.162672  |

#### 1SS

E = -2286.184891 a.u.

|    |           |           |           |
|----|-----------|-----------|-----------|
| Pd | -0.086929 | 0.097539  | -0.325783 |
| S  | -0.000286 | -2.203388 | -0.716790 |
| F  | 4.583380  | 0.776774  | -0.918898 |
| F  | 4.313494  | -1.161764 | 0.033729  |
| F  | 4.936964  | 0.553703  | 1.209462  |
| F  | -4.817749 | -1.129232 | 1.454207  |
| F  | -4.657511 | -1.011637 | -0.706608 |
| F  | -4.584107 | 0.801354  | 0.490106  |
| O  | 1.933933  | 0.089185  | -0.514099 |
| O  | -2.100705 | 0.108623  | -0.357424 |
| O  | -1.199342 | -2.868570 | -1.298415 |
| O  | 2.330259  | 1.060815  | 1.496889  |
| O  | -2.157921 | -1.347621 | 1.372523  |
| C  | 1.418560  | -2.574797 | -1.769438 |
| C  | 0.480859  | -3.015021 | 0.819968  |
| C  | 2.668192  | 0.497355  | 0.472455  |
| C  | 4.157791  | 0.171427  | 0.202569  |
| C  | -2.679126 | -0.623604 | 0.543552  |
| C  | -4.217280 | -0.492807 | 0.450670  |
| H  | 2.319520  | -2.122678 | -1.353633 |
| H  | 1.492956  | -3.663471 | -1.840494 |
| H  | 1.201568  | -2.150197 | -2.752212 |
| H  | 1.410276  | -2.571175 | 1.186895  |
| H  | -0.337441 | -2.834159 | 1.519310  |
| H  | 0.600922  | -4.082783 | 0.614239  |
| S  | -0.385515 | 2.387722  | 0.014440  |
| O  | -0.974776 | 2.838958  | 1.304165  |
| C  | 1.096135  | 3.354464  | -0.333008 |
| H  | 1.784156  | 3.167299  | 0.493077  |
| H  | 1.532734  | 3.029315  | -1.281217 |
| H  | 0.806647  | 4.408563  | -0.364914 |
| C  | -1.457652 | 2.913010  | -1.338853 |
| H  | -2.375844 | 2.329316  | -1.248935 |
| H  | -1.657385 | 3.980961  | -1.212237 |
| H  | -0.968237 | 2.707191  | -2.295262 |

#### (DMSO)AgOOCPh

E = -1120.221193 a.u.

|    |           |           |           |
|----|-----------|-----------|-----------|
| Ag | -0.908686 | -0.118953 | -0.308732 |
| O  | 1.029310  | 0.848690  | -0.205448 |
| O  | 1.244597  | -1.365802 | -0.031380 |
| C  | 1.736440  | -0.215729 | -0.071071 |
| O  | -3.028535 | -0.643254 | -0.343890 |
| S  | -4.073885 | 0.466073  | -0.106289 |
| C  | -4.153063 | 0.708833  | 1.687680  |
| H  | -4.976789 | 1.390189  | 1.922939  |
| H  | -4.283322 | -0.256199 | 2.186068  |
| H  | -3.205104 | 1.159990  | 1.992540  |
| C  | -5.653302 | -0.390489 | -0.321145 |
| H  | -5.718584 | -0.679480 | -1.372725 |
| H  | -5.670366 | -1.282966 | 0.310682  |
| H  | -6.473943 | 0.288608  | -0.070891 |
| C  | 3.222216  | -0.036681 | 0.040336  |
| C  | 3.798773  | 1.236687  | -0.014942 |
| C  | 4.042280  | -1.158791 | 0.198243  |
| C  | 5.180002  | 1.384972  | 0.086169  |
| H  | 3.148871  | 2.097188  | -0.138991 |
| C  | 5.422820  | -1.009871 | 0.300024  |
| C  | 3.574232  | -2.137587 | 0.237407  |
| H  | 5.993957  | 0.262418  | 0.243756  |
| H  | 5.623782  | 2.376868  | 0.041355  |
| H  | 6.055712  | -1.885761 | 0.422412  |
| H  | 7.072549  | 0.378943  | 0.322117  |

#### 2OS

E = -2180.252629 a.u.

|    |           |           |           |   |           |           |           |
|----|-----------|-----------|-----------|---|-----------|-----------|-----------|
| Pd | 0.349018  | -0.237913 | -0.515071 | C | 1.236669  | -3.327709 | -0.922981 |
| S  | 0.205836  | -2.474271 | -0.187615 | C | 0.181892  | -2.767416 | 1.592723  |
| S  | 0.103095  | 2.689090  | 0.279837  | C | 2.697034  | 0.305874  | 0.304001  |
| F  | 4.993636  | 0.363958  | -1.046473 | C | 1.111097  | 3.884332  | 0.260733  |
| F  | 4.816309  | -1.203481 | 0.451200  | C | -1.520763 | 3.659132  | -0.534695 |
| F  | 5.265614  | 0.833074  | 1.053447  | C | -2.662100 | -0.294701 | 0.357001  |
| O  | 2.375166  | -0.419240 | -0.447132 | H | 2.154747  | -2.793442 | -0.672946 |
| O  | 0.503135  | 1.790727  | -0.933650 | H | 1.241724  | -4.363482 | -0.572614 |
| O  | -1.639955 | -0.010431 | -0.655960 | H | 1.063365  | -3.297507 | -2.001183 |
| O  | -1.021565 | -3.209226 | -0.599792 | H | 1.151747  | -2.326440 | 1.838208  |
| O  | 2.639799  | 1.256578  | 1.066195  | H | -0.621592 | -2.259302 | 2.128799  |
| O  | -1.842718 | -0.804006 | 1.441335  | H | 0.168748  | -3.846557 | 1.772355  |
| C  | 1.621433  | -3.246683 | -1.000622 | H | 0.825166  | 4.663563  | 0.973990  |
| C  | 0.568861  | -2.812560 | 1.544498  | H | 1.991212  | 3.344313  | 0.616212  |
| C  | 3.038998  | 0.378405  | 0.315093  | H | 1.281408  | 4.301957  | -0.735533 |
| C  | 4.557498  | 0.096377  | 0.195848  | H | -1.816712 | 4.431228  | 0.182467  |
| C  | 1.336953  | 4.002962  | 0.237073  | H | -1.180480 | 4.102478  | -1.474741 |
| C  | -1.328335 | 3.598734  | -0.345122 | H | -2.356371 | 2.980207  | -0.719906 |
| C  | -2.328551 | -0.356160 | 0.400362  | C | -4.130109 | -0.010245 | 0.210083  |
| H  | 2.534164  | -2.715095 | -0.726288 | C | -4.679702 | 0.425401  | -1.001358 |
| H  | 1.642006  | -4.298661 | -0.702998 | C | -4.960875 | -0.185736 | 1.321739  |
| H  | 1.445678  | 3.165138  | -2.075786 | C | -6.045180 | 0.685270  | -1.095746 |
| H  | 1.535790  | -2.371236 | 1.799970  | H | -4.029806 | 0.543297  | -1.862839 |
| H  | -0.237429 | -2.337963 | 2.106368  | C | -6.324435 | 0.077030  | 1.226295  |
| H  | 0.572123  | -3.897934 | 1.681672  | H | -4.514622 | -0.532337 | 2.248759  |
| H  | 1.050988  | 4.782148  | 0.950257  | C | -6.868660 | 0.514016  | 0.017595  |
| H  | 2.276546  | 3.536872  | 0.539825  | H | -6.469181 | 1.016935  | -2.040525 |
| H  | 1.406890  | 4.402056  | -0.778629 | H | -6.965352 | -0.061261 | 2.093659  |
| H  | -1.626252 | 4.353394  | 0.389564  | H | -7.934444 | 0.716594  | -0.057718 |
| H  | -1.084913 | 4.057796  | -1.307346 | C | 4.193826  | 0.203972  | 0.200608  |
| H  | -2.125695 | 2.862802  | -0.471776 | C | 4.815648  | -0.490314 | -0.843478 |
| C  | -3.806754 | -0.133872 | 0.265223  | C | 4.979290  | 0.826632  | 1.176677  |
| C  | -4.621138 | -0.355974 | 1.380907  | C | 6.205305  | -0.560087 | -0.908516 |
| C  | -4.382449 | 0.288609  | -0.938842 | H | 4.201073  | -0.960407 | -1.604679 |
| C  | -5.995301 | -0.152091 | 1.296402  | C | 6.367767  | 0.749721  | 1.115289  |
| H  | -4.154676 | -0.691577 | 2.301985  | H | 4.479238  | 1.362969  | 1.977504  |
| C  | -5.758461 | 0.489480  | -1.021759 | C | 6.983215  | 0.056515  | 0.071903  |
| C  | -6.565889 | 0.271941  | 0.095240  | H | 6.682953  | -1.094978 | -1.725764 |
| H  | -6.623786 | -0.326445 | 2.166255  | H | 6.972082  | 1.230754  | 1.880476  |
| H  | -6.202956 | 0.811022  | -1.960477 | H | 8.067867  | -0.001344 | 0.021884  |
| H  | -7.639934 | 0.428319  | 0.028629  |   |           |           |           |
| H  | -3.744765 | 0.442767  | -1.803639 |   |           |           |           |

**(DMSO)AgOCCF<sub>3</sub>**

E = -1226.162458 a.u.

|    |           |           |           |
|----|-----------|-----------|-----------|
| Ag | -0.876633 | -0.081286 | -0.161370 |
| O  | 1.102448  | 0.704571  | -0.358852 |
| O  | 1.370562  | -1.424353 | 0.315912  |
| C  | 1.792893  | -0.315181 | -0.018898 |
| O  | -2.973152 | -0.590099 | 0.025470  |
| S  | -4.059418 | 0.503614  | -0.074308 |
| C  | -4.321355 | 1.094000  | 1.617697  |
| H  | -5.176971 | 1.776429  | 1.632141  |
| H  | -4.483406 | 0.242349  | 2.284682  |
| H  | -3.417987 | 1.633095  | 1.914321  |
| C  | -5.587968 | -0.442907 | -0.264426 |
| H  | -5.537730 | -0.936495 | -1.237789 |
| H  | -5.651967 | -1.191985 | 0.529766  |
| H  | -6.443527 | 0.238589  | -0.237193 |
| C  | 3.315054  | -0.056513 | -0.040929 |
| F  | 3.709689  | 0.374349  | -1.252201 |
| F  | 3.641379  | 0.890506  | 0.859155  |
| F  | 4.016219  | -1.156788 | 0.250910  |

**3OS**

E = -2074.310469 a.u.

|    |           |           |           |
|----|-----------|-----------|-----------|
| Pd | 0.033142  | -0.274355 | -0.557138 |
| S  | -0.165170 | -2.488955 | -0.153650 |
| S  | -0.201833 | 2.650845  | 0.180488  |
| O  | 2.053553  | -0.476244 | -0.516806 |
| O  | 0.227843  | 1.746935  | -1.016909 |
| O  | -1.955071 | 0.007573  | -0.698359 |
| O  | -1.403447 | -3.218752 | -0.545063 |
| O  | 2.174198  | 1.069920  | 1.121911  |
| O  | -2.205991 | -0.751302 | 1.407649  |

**TS1**

E = -2180.226553 a.u.

|    |           |           |           |
|----|-----------|-----------|-----------|
| Pd | 0.007845  | 0.218260  | -0.023392 |
| S  | 0.040900  | -2.511844 | -0.702949 |
| S  | 0.595853  | 3.220348  | -0.153543 |
| F  | 4.596476  | -0.663980 | 0.339969  |
| F  | 3.755065  | -1.342648 | 2.226148  |
| F  | 4.811341  | 0.550944  | 2.125751  |
| O  | 1.856353  | -0.359396 | 0.513933  |
| O  | 0.733311  | 1.912119  | -0.998474 |
| O  | -1.913383 | 0.638772  | -0.412536 |
| O  | -1.055638 | -3.294533 | -1.380245 |
| O  | 2.481100  | 1.628641  | 1.420920  |
| O  | -1.689712 | -0.800820 | 1.233071  |
| C  | 1.583799  | -2.811909 | -1.613067 |
| C  | 0.486543  | -3.368195 | 0.832230  |
| C  | 2.646566  | 0.455173  | 1.118547  |
| C  | 3.978960  | -0.254421 | 1.465584  |
| C  | 2.157101  | 4.074548  | -0.448191 |
| C  | -0.488649 | 4.235992  | -1.186313 |
| C  | -2.447266 | -0.143639 | 0.476342  |
| H  | 2.402192  | -2.296904 | -1.104333 |
| H  | 1.759787  | -3.890111 | -1.676787 |
| H  | 1.445822  | -2.399857 | -2.615879 |
| H  | 1.355134  | -2.873431 | 1.274358  |
| H  | -0.374456 | -3.280823 | 1.498104  |
| H  | 0.690282  | -4.419539 | 0.606959  |
| H  | 2.086726  | 5.089451  | -0.044937 |
| H  | 2.913333  | 3.503722  | 0.093249  |
| H  | 2.365840  | 4.088693  | -1.521484 |
| H  | -0.567243 | 5.238260  | -0.753382 |
| H  | -0.099360 | 4.277285  | -2.207358 |
| H  | -1.466878 | 3.749469  | -1.180031 |
| C  | -3.921873 | -0.225362 | 0.562664  |

|   |           |           |           |
|---|-----------|-----------|-----------|
| C | -4.505534 | -1.010131 | 1.563597  |
| C | -4.730487 | 0.472345  | -0.342095 |
| C | -5.890827 | -1.092928 | 1.660068  |
| H | -3.860569 | -1.547018 | 2.252212  |
| C | -6.115638 | 0.385448  | -0.242558 |
| C | -6.696016 | -0.395339 | 0.758220  |
| H | -6.344428 | -1.703041 | 2.436630  |
| H | -6.744598 | 0.922925  | -0.947382 |
| H | -7.778502 | -0.462795 | 0.833651  |
| H | -4.264171 | 1.068854  | -1.120000 |

#### DMSO

E = -553.080793 a.u.

|   |           |           |           |
|---|-----------|-----------|-----------|
| S | 0.000014  | 0.237593  | -0.436490 |
| O | 0.000308  | 1.518143  | 0.357459  |
| C | -1.352135 | -0.810657 | 0.195796  |
| H | -2.292139 | -0.311150 | -0.052101 |
| H | -1.314904 | -1.789791 | -0.293164 |
| H | -1.268905 | -0.913011 | 1.282570  |
| C | 1.351875  | -0.811150 | 0.195595  |
| H | 1.314209  | -1.790275 | -0.293349 |
| H | 2.292024  | -0.311990 | -0.052451 |
| H | 1.268773  | -0.913462 | 1.282383  |

#### 4

E = -1627.144756 a.u.

|    |           |           |           |
|----|-----------|-----------|-----------|
| Pd | 0.181687  | 0.060641  | -0.539504 |
| S  | 0.300481  | 3.009894  | 0.266001  |
| F  | 4.889437  | 0.614872  | -0.788975 |
| F  | 4.544083  | -1.202409 | 0.353807  |
| F  | 5.014200  | 0.649358  | 1.377158  |
| O  | 2.156712  | -0.239033 | -0.397841 |
| O  | 0.456561  | 2.049877  | -0.962649 |
| O  | -1.872506 | -0.161839 | -0.654525 |
| O  | 2.484775  | 1.412349  | 1.125131  |
| O  | -0.538458 | -1.842999 | -0.261122 |
| C  | 2.845776  | 0.490885  | 0.398625  |
| C  | 4.349630  | 0.122086  | 0.343395  |
| C  | 1.697356  | 4.138786  | 0.103364  |
| C  | -1.017208 | 4.114112  | -0.300693 |
| C  | -1.734159 | -1.417647 | -0.432485 |
| H  | 1.553530  | 4.976235  | 0.792935  |
| H  | 2.579461  | 3.562456  | 0.385899  |
| H  | 1.762054  | 4.484332  | -0.931970 |
| H  | -1.144897 | 4.925225  | 0.423048  |
| H  | -0.774299 | 4.506659  | -1.291873 |
| H  | -1.930744 | 3.516800  | -0.351283 |
| C  | -2.888190 | -2.328558 | -0.377370 |
| C  | -2.685790 | -3.690770 | -0.124004 |
| C  | -4.181350 | -1.830970 | -0.577541 |
| C  | -3.777689 | -4.550705 | -0.071120 |
| H  | -1.675096 | -4.057081 | 0.027717  |
| C  | -5.268765 | -2.696414 | -0.523194 |
| C  | -5.067292 | -4.054557 | -0.270215 |
| H  | -3.624917 | -5.608457 | 0.124959  |
| H  | -6.274138 | -2.314518 | -0.678681 |
| H  | -5.918770 | -4.729159 | -0.228636 |
| H  | -4.317331 | -0.772086 | -0.774854 |

#### TS2

E = -1627.120660 a.u.

|    |           |           |           |
|----|-----------|-----------|-----------|
| Pd | -0.592885 | 0.364746  | 0.164542  |
| S  | 0.983044  | 2.956994  | -0.502260 |
| F  | -5.180809 | 0.083402  | -0.355811 |
| F  | -4.794940 | -0.871483 | 1.558086  |
| F  | -4.800272 | -2.052036 | -0.264479 |
| O  | -2.575967 | 0.579142  | 0.430365  |
| O  | -0.363930 | 2.431637  | 0.085520  |
| O  | 1.371969  | 0.078328  | -0.103342 |
| O  | -2.183700 | -1.476454 | -0.301581 |
| O  | 0.601755  | -1.642300 | 1.045005  |
| C  | -2.958033 | -0.602280 | 0.097480  |
| C  | -4.463461 | -0.871612 | 0.256592  |
| C  | 0.586399  | 4.700893  | -0.744585 |
| C  | 2.102294  | 3.103444  | 0.909335  |

|   |           |           |           |
|---|-----------|-----------|-----------|
| C | 1.549885  | -1.085902 | 0.474038  |
| H | 1.490465  | 5.234729  | -1.052524 |
| H | -0.163752 | 4.750544  | -1.537049 |
| H | 0.177991  | 5.113940  | 0.181466  |
| H | 3.006283  | 3.634600  | 0.595028  |
| H | 1.598408  | 3.626287  | 1.726996  |
| H | 2.350823  | 2.081118  | 1.200918  |
| C | 2.909372  | -1.682296 | 0.408640  |
| C | 3.163083  | -2.855741 | 1.127457  |
| C | 3.926219  | -1.098254 | -0.355044 |
| C | 4.427604  | -3.434802 | 1.089546  |
| H | 2.356592  | -3.297011 | 1.705122  |
| C | 5.189163  | -1.682851 | -0.394405 |
| C | 5.441359  | -2.848997 | 0.329533  |
| H | 4.623419  | -4.345528 | 1.649430  |
| H | 5.977157  | -1.232652 | -0.992808 |
| H | 6.428196  | -3.304231 | 0.298021  |
| H | 3.713605  | -0.197851 | -0.923443 |

#### INT

E = -1627.134720 a.u.

|    |           |           |           |
|----|-----------|-----------|-----------|
| Pd | -0.798891 | 0.410991  | -0.196018 |
| S  | 1.355609  | 2.663033  | 0.430057  |
| F  | -5.265672 | -0.288368 | -0.999841 |
| F  | -4.944922 | -1.060741 | 1.005940  |
| F  | -4.483643 | -2.295895 | -0.720884 |
| O  | -2.870488 | 0.752993  | -0.028543 |
| O  | -0.129651 | 2.316877  | 0.069843  |
| O  | 0.968890  | -0.426018 | -0.545376 |
| O  | -2.051244 | -1.242925 | -0.436854 |
| O  | 1.681606  | 0.096773  | 1.522538  |
| C  | -3.042338 | -0.480375 | -0.244725 |
| C  | -4.465646 | -1.050983 | -0.246416 |
| C  | 1.438793  | 4.354474  | -0.203470 |
| C  | 1.325003  | 3.024264  | 2.197284  |
| C  | 1.809193  | -0.503275 | 0.447577  |
| H  | 2.394368  | 4.800289  | 0.089296  |
| H  | 1.378196  | 4.291007  | -1.292360 |
| H  | 0.598204  | 4.936404  | 0.183723  |
| H  | 2.286766  | 3.461485  | 2.483574  |
| H  | 0.498070  | 3.705007  | 2.416636  |
| H  | 1.191309  | 2.059668  | 2.688747  |
| C  | 2.998438  | -1.374334 | 0.179572  |
| C  | 3.990174  | -1.475599 | 1.161432  |
| C  | 3.134889  | -2.082536 | -1.020002 |
| C  | 5.110193  | -2.272729 | 0.944860  |
| H  | 3.859950  | -0.926059 | 2.088596  |
| C  | 4.256822  | -2.878934 | -1.234271 |
| C  | 5.245362  | -2.974350 | -0.253956 |
| H  | 5.877468  | -2.350353 | 1.711136  |
| H  | 4.359446  | -3.428973 | -2.166291 |
| H  | 6.119707  | -3.598295 | -0.423007 |
| H  | 2.356509  | -2.003476 | -1.771890 |

#### TS3

E = -1627.110975 a.u.

|    |           |           |           |
|----|-----------|-----------|-----------|
| Pd | -0.476647 | -0.060887 | 0.140240  |
| S  | -3.395476 | -1.010835 | -0.272772 |
| F  | 2.760670  | -3.337197 | -0.330549 |
| F  | 3.661159  | -1.926102 | 1.056316  |
| F  | 3.963026  | -1.693476 | -1.081164 |
| O  | 0.845347  | -1.547421 | 0.529852  |
| O  | -2.116118 | -1.283280 | 0.584767  |
| O  | -1.803893 | 1.344726  | -0.302622 |
| O  | 1.788534  | -0.143819 | -0.908530 |
| O  | -1.931289 | 3.465554  | -0.994735 |
| C  | 1.819893  | -1.162269 | -0.209282 |
| C  | 3.076808  | -2.046690 | -0.148717 |
| C  | -4.253397 | -2.590965 | -0.102858 |
| C  | -4.464677 | 0.014267  | 0.760789  |
| C  | -1.303120 | 2.556180  | -0.488478 |
| H  | -5.240750 | -2.513655 | -0.568171 |
| H  | -3.652692 | -3.338062 | -0.626477 |
| H  | -4.334694 | -2.852895 | 0.955355  |
| H  | -5.449439 | 0.086082  | 0.288332  |

|   |           |           |           |
|---|-----------|-----------|-----------|
| H | -4.535598 | -0.419652 | 1.762206  |
| H | -3.990948 | 0.997079  | 0.790656  |
| C | 0.118666  | 2.693995  | -0.025472 |
| C | 0.523164  | 2.162985  | 1.216070  |
| C | 1.051399  | 3.359181  | -0.829046 |
| C | 1.855326  | 2.284833  | 1.628530  |
| H | -0.218505 | 1.763537  | 1.907630  |
| C | 2.373978  | 3.463688  | -0.417000 |
| C | 2.778980  | 2.921599  | 0.807647  |
| H | 2.157734  | 1.891286  | 2.595286  |
| H | 3.098717  | 3.967868  | -1.050740 |
| H | 3.815521  | 3.009540  | 1.122142  |
| H | 0.722498  | 3.782598  | -1.773366 |

#### 5

E = -1627.128350 a.u.

|    |           |           |           |
|----|-----------|-----------|-----------|
| Pd | -0.557875 | 0.865987  | 0.973478  |
| S  | -2.755642 | -0.780509 | -0.316647 |
| F  | 2.098056  | -2.969376 | 1.037957  |
| F  | 3.240771  | -1.630966 | -0.238880 |
| F  | 2.000819  | -3.178504 | -1.118186 |
| O  | 0.955469  | -0.458052 | 0.807389  |
| O  | -1.948474 | -0.679858 | 1.019551  |
| O  | -2.006250 | 2.250202  | 1.097142  |
| O  | 0.029685  | -1.416887 | -1.031921 |
| O  | -1.907039 | 4.333347  | 0.212874  |
| C  | 0.879106  | -1.306019 | -0.154782 |
| C  | 2.074699  | -2.290589 | -0.122141 |
| C  | -2.858038 | -2.557683 | -0.597999 |
| C  | -4.448189 | -0.450512 | 0.222728  |
| C  | -1.396327 | 3.298454  | 0.580956  |
| H  | -3.552416 | -2.746838 | -1.422351 |
| H  | -1.848497 | -2.869955 | -0.872217 |
| H  | -3.187839 | -3.052631 | 0.319598  |
| H  | -5.132698 | -0.606678 | -0.617054 |
| H  | -4.704650 | -1.096933 | 1.066647  |
| H  | -4.468409 | 0.597509  | 0.532116  |
| C  | 0.086917  | 2.992573  | 0.471543  |
| C  | 0.794191  | 2.569973  | 1.635750  |
| C  | 0.792466  | 3.186256  | -0.740818 |
| C  | 2.189957  | 2.347317  | 1.557764  |
| H  | 0.316695  | 2.629437  | 2.612602  |
| C  | 2.149448  | 2.944546  | -0.790013 |
| C  | 2.849671  | 2.517886  | 0.359190  |
| H  | 2.730977  | 2.047588  | 2.450206  |
| H  | 2.690047  | 3.089591  | -1.721586 |
| H  | 3.919076  | 2.337385  | 0.297438  |
| H  | 0.247716  | 3.540167  | -1.610897 |

#### TS4

E = -1627.098354 a.u.

|    |           |           |           |
|----|-----------|-----------|-----------|
| Pd | -0.558777 | 0.525626  | -0.304302 |
| S  | 1.404695  | 2.860843  | 0.538886  |
| F  | 2.785546  | -2.631048 | -0.838584 |
| F  | 3.511323  | -2.231847 | 1.163698  |
| F  | 4.109455  | -0.946364 | -0.483787 |
| O  | 0.927916  | -0.831202 | -0.497280 |
| O  | 0.795852  | 2.137106  | -0.693363 |
| O  | -2.268098 | 1.647260  | -0.126939 |
| O  | 2.049154  | 0.103358  | 1.238258  |
| O  | -4.210060 | 0.537884  | 0.433435  |
| C  | 1.906217  | -0.696286 | 0.314856  |
| C  | 3.082395  | -1.659804 | 0.029783  |
| C  | 3.190676  | 2.801965  | 0.274633  |
| C  | 1.135736  | 4.606116  | 0.135720  |
| C  | -3.085246 | 0.753156  | 0.138508  |
| H  | 3.678445  | 3.439092  | 1.018995  |
| H  | 3.484328  | 1.761804  | 0.423524  |
| H  | 3.419329  | 3.134395  | -0.741902 |
| H  | 1.635276  | 5.233473  | 0.880616  |
| H  | 1.510868  | 4.816779  | -0.869778 |
| H  | 0.057270  | 4.778019  | 0.171561  |
| C  | -1.984696 | -0.899146 | -0.031944 |
| C  | -2.431277 | -1.572664 | -1.192516 |
| C  | -1.996220 | -1.589891 | 1.202643  |

|   |           |           |           |
|---|-----------|-----------|-----------|
| C | -2.886205 | -2.883863 | -1.117643 |
| H | -2.423917 | -1.055732 | -2.149381 |
| C | -2.449052 | -2.900289 | 1.272811  |
| C | -2.895179 | -3.543170 | 0.113706  |
| H | -3.229973 | -3.395823 | -2.012489 |
| H | -2.454788 | -3.427020 | 2.223402  |
| H | -3.252499 | -4.568433 | 0.171813  |
| H | -1.650512 | -1.085997 | 2.101951  |

#### 6

E = -1627.118117 a.u.

|    |           |           |           |
|----|-----------|-----------|-----------|
| Pd | -0.493290 | 0.329795  | -0.136655 |
| S  | 1.471727  | 2.786683  | 0.745001  |
| F  | 2.993932  | -2.455770 | -1.382238 |
| F  | 3.940635  | -2.158547 | 0.543683  |
| F  | 4.206039  | -0.687554 | -1.034649 |
| O  | 1.055423  | -0.874242 | -0.647267 |
| O  | 0.598151  | 2.223909  | -0.401460 |
| O  | -2.332455 | 1.592269  | 0.215658  |
| O  | 2.313785  | 0.017036  | 1.017119  |
| O  | -4.461977 | 1.044492  | -0.576020 |
| C  | 2.115472  | -0.715849 | 0.051508  |
| C  | 3.319423  | -1.538183 | -0.467503 |
| C  | 3.157256  | 2.840834  | 0.091542  |
| C  | 1.125972  | 4.565404  | 0.669896  |
| C  | -3.397395 | 1.285409  | -0.186402 |
| H  | 3.789470  | 3.394292  | 0.793016  |
| H  | 3.495989  | 1.806301  | 0.026297  |
| H  | 3.150767  | 3.315659  | -0.893833 |
| H  | 1.783715  | 5.095138  | 1.366135  |
| H  | 1.264907  | 4.928305  | -0.352559 |
| O  | 0.084905  | 4.703114  | 0.971887  |
| C  | -1.588047 | -1.281745 | 0.055243  |
| C  | -1.671286 | -2.228688 | -0.970400 |
| C  | -2.338556 | -1.455193 | 1.224793  |
| C  | -2.529344 | -3.322136 | -0.838112 |
| H  | -1.057648 | -2.121670 | -1.860987 |
| C  | -3.189296 | -2.558125 | 1.352499  |
| C  | -3.290286 | -3.487886 | 0.319781  |
| H  | -2.594454 | -2.052310 | -1.641819 |
| H  | -3.765254 | -2.689497 | 2.266000  |
| H  | -3.951271 | -4.345080 | 0.420182  |
| H  | -2.250573 | -0.749726 | 2.049774  |

#### CO<sub>2</sub>

E = -188.504221 a.u.

|   |          |          |           |
|---|----------|----------|-----------|
| C | 0.000000 | 0.000000 | 0.000000  |
| O | 0.000000 | 0.000000 | 1.167941  |
| O | 0.000000 | 0.000000 | -1.167941 |

#### cis-7

E = -1991.729184 a.u.

|    |           |           |           |
|----|-----------|-----------|-----------|
| Pd | -0.523341 | 0.659320  | -0.165184 |
| S  | 2.399362  | 2.193519  | 0.486044  |
| F  | 1.690387  | -3.456763 | -0.126289 |
| F  | 2.533208  | -3.014003 | 1.818797  |
| F  | 3.481580  | -2.236908 | 0.023320  |
| O  | 0.603331  | -1.069908 | -0.224846 |
| O  | 1.230319  | 1.990798  | -0.508636 |
| O  | 1.777711  | -0.407330 | 1.595258  |
| C  | 1.470843  | -1.196260 | 0.699369  |
| C  | 2.284538  | -2.510165 | 0.603540  |
| C  | 3.808470  | 1.283394  | -0.193223 |
| C  | 2.994879  | 3.852702  | 0.047801  |
| H  | 4.708455  | 1.584900  | 0.352121  |
| H  | 3.629046  | 0.231393  | -0.032531 |
| H  | 3.900782  | 1.505222  | -1.260297 |
| H  | 3.916882  | 4.064066  | 0.598248  |
| H  | 3.162623  | 3.912863  | -1.031463 |
| H  | 2.225258  | 4.569403  | 0.343614  |
| C  | -2.092539 | -0.533420 | 0.040926  |
| C  | -3.026673 | -0.681295 | -0.988054 |
| C  | -2.234789 | -1.268573 | 1.222081  |
| C  | -4.102460 | -1.561158 | -0.829988 |
| H  | -2.930060 | -0.111058 | -1.908877 |

|   |           |           |           |
|---|-----------|-----------|-----------|
| C | -3.315238 | -2.141197 | 1.373631  |
| C | -4.250698 | -2.289121 | 0.349420  |
| H | -4.824087 | -1.672852 | -1.636304 |
| H | -3.417509 | -2.712827 | 2.293633  |
| H | -5.088048 | -2.972219 | 0.468640  |
| H | -1.501802 | -1.175093 | 2.020005  |
| S | -1.956622 | 2.419509  | -0.227830 |
| O | -2.687773 | 2.707353  | -1.502285 |
| C | -3.172159 | 2.346054  | 1.107381  |
| H | -3.801437 | 1.475795  | 0.914307  |
| H | -2.656669 | 2.227047  | 2.064338  |
| H | -3.763775 | 3.265668  | 1.076074  |
| C | -1.097525 | 3.935082  | 0.256109  |
| H | -0.654568 | 3.807731  | 1.247669  |
| H | -0.319960 | 4.104370  | -0.489644 |

**trans-7**

E = -1991.737226 a.u.

|    |           |           |           |
|----|-----------|-----------|-----------|
| Pd | 0.063106  | 0.131494  | -0.529941 |
| S  | -0.085389 | -2.174562 | -0.801632 |
| F  | 4.274267  | 1.570315  | 0.756274  |
| F  | 4.942860  | -0.103851 | -0.462068 |
| F  | 4.850351  | -0.299218 | 1.695604  |
| O  | 2.191457  | 0.249340  | -0.517502 |
| O  | -1.008773 | -2.725395 | -1.843164 |
| O  | 2.317059  | -1.037322 | 1.341597  |
| C  | 1.538711  | -2.909965 | -1.080375 |
| C  | -0.484383 | -2.878106 | 0.809109  |
| C  | 2.769460  | -0.256434 | 0.507415  |
| C  | 4.235753  | 0.223978  | 0.634867  |
| H  | 2.175659  | -2.711139 | -0.217036 |
| H  | 1.371891  | -3.980067 | -1.233468 |
| H  | 1.953736  | -2.458010 | -1.983290 |
| H  | 0.249062  | -2.500718 | 1.527499  |
| H  | -1.490606 | -2.536027 | 1.061329  |
| H  | -0.459391 | -3.968994 | 0.728416  |
| S  | 0.039100  | 2.458788  | -0.340584 |
| O  | -0.122056 | 3.041730  | 1.027977  |
| C  | 1.544494  | 3.123014  | -1.082259 |
| H  | 2.389660  | 2.718096  | -0.525259 |
| H  | 1.608132  | 2.798131  | -2.124348 |
| H  | 1.498748  | 4.212723  | -0.999958 |
| C  | -1.189772 | 3.210026  | -1.429824 |
| H  | -2.171236 | 2.907868  | -1.060667 |
| H  | -1.071972 | 4.296050  | -1.371655 |
| H  | -1.045576 | 2.843393  | -2.449823 |
| C  | -1.943556 | 0.170586  | -0.445185 |
| C  | -2.546341 | 0.561543  | 0.757793  |
| C  | -2.746613 | -0.149906 | -1.544548 |
| C  | -3.939691 | 0.631115  | 0.855927  |
| H  | -1.937678 | 0.834837  | 1.617727  |
| C  | -4.138362 | -0.071479 | -1.442132 |
| H  | -2.298021 | -0.492148 | -2.473277 |
| C  | -4.737208 | 0.318321  | -0.244296 |
| H  | -4.396065 | 0.937733  | 1.794449  |
| H  | -4.753282 | -0.327848 | -2.301980 |
| H  | -5.820184 | 0.375169  | -0.168022 |

**2OS<sub>o-OMe</sub>**

E = -2294.723556 a.u.

|    |           |           |           |
|----|-----------|-----------|-----------|
| Pd | 0.617035  | -0.207472 | -0.470109 |
| S  | 0.595030  | -2.470861 | -0.458968 |
| S  | 0.118113  | 2.543591  | 0.695490  |
| F  | 5.183078  | 0.754706  | -1.076851 |
| F  | 5.184144  | -1.045750 | 0.143691  |
| F  | 5.524663  | 0.892759  | 1.060020  |
| O  | 2.653060  | -0.272902 | -0.547905 |
| O  | 0.670934  | 1.865910  | -0.597792 |
| O  | -1.383811 | -0.041559 | -0.463979 |
| O  | -0.612416 | -3.212334 | -0.917918 |
| O  | 2.879730  | 1.057195  | 1.281502  |
| O  | -1.423185 | -1.192578 | 1.462022  |
| C  | 2.001425  | -3.042747 | -1.437778 |
| C  | 1.069241  | -3.034758 | 1.185787  |
| C  | 3.299706  | 0.394881  | 0.343753  |

|   |           |           |           |
|---|-----------|-----------|-----------|
| C | 4.825767  | 0.256177  | 0.118220  |
| C | 1.326398  | 3.840871  | 1.024292  |
| C | -1.258140 | 3.537691  | 0.083694  |
| C | -1.994250 | -0.585346 | 0.550900  |
| H | 2.904324  | -2.516719 | -1.123357 |
| H | 2.078155  | -4.125438 | -1.305012 |
| H | 1.772986  | -2.808258 | -2.480013 |
| H | 2.020094  | -2.571769 | 1.462448  |
| H | 0.267791  | -2.701446 | 1.846957  |
| H | 1.144814  | -4.125816 | 1.159043  |
| H | 0.961628  | 4.467329  | 1.844136  |
| H | 2.241779  | 3.321619  | 1.317039  |
| H | 1.487686  | 4.430307  | 0.117369  |
| H | -1.651733 | 4.148220  | 0.902692  |
| H | -0.919231 | 4.163442  | -0.746938 |
| H | -2.014635 | 2.825358  | -0.258561 |
| C | -3.495237 | -0.456927 | 0.564707  |
| C | -4.163077 | -1.264344 | 1.492134  |
| C | -4.268209 | 0.376748  | -0.277101 |
| C | -5.549256 | -1.284452 | 1.594332  |
| H | -3.544648 | -1.887659 | 2.129593  |
| C | -5.665475 | 0.356039  | -0.175215 |
| C | -6.298118 | -0.470286 | 0.750269  |
| H | -6.036656 | -1.930675 | 2.318684  |
| H | -6.269247 | 0.990405  | -0.814575 |
| H | -7.384060 | -0.468257 | 0.806711  |
| O | -3.620794 | 1.195338  | -1.148248 |
| C | -4.381473 | 1.877360  | -2.124572 |
| H | -4.988186 | 1.181595  | -2.717667 |
| H | -5.036457 | 2.639117  | -1.679138 |
| H | -3.655008 | 2.365250  | -2.777339 |

**TS4<sub>o-OMe</sub>**

E = -1741.582094 a.u.

|    |           |           |           |
|----|-----------|-----------|-----------|
| Pd | 0.380158  | -0.679040 | -0.294807 |
| S  | -2.437804 | -1.982704 | 0.369740  |
| F  | -1.275983 | 3.616624  | -0.640247 |
| F  | -1.753848 | 3.550649  | 1.473570  |
| F  | -3.197049 | 2.846163  | 0.007879  |
| O  | -0.347365 | 1.207996  | -0.328848 |
| O  | -1.532817 | -1.513920 | -0.800421 |
| O  | 1.438035  | -2.456848 | -0.246329 |
| O  | -1.903793 | 0.720729  | 1.250636  |
| O  | 3.543599  | -2.367166 | 0.700823  |
| C  | -1.335588 | 1.453563  | 0.443299  |
| C  | -1.883081 | 2.894845  | 0.306946  |
| C  | -4.017395 | -1.148209 | 0.098956  |
| C  | -2.928913 | -3.644076 | -0.162049 |
| C  | 2.510422  | -2.057318 | 0.219706  |
| H  | -4.762417 | -1.572405 | 0.779415  |
| H  | -3.846934 | -0.097242 | 0.337837  |
| H  | -4.319096 | -1.273153 | -0.944947 |
| H  | -3.674975 | -4.044295 | 0.531715  |
| H  | -3.322494 | -3.606048 | -1.181801 |
| H  | -2.030061 | -4.264838 | -0.136148 |
| C  | 2.269171  | -0.053157 | 0.016970  |
| C  | 3.040085  | 0.248393  | -1.128714 |
| C  | 2.618508  | 0.568741  | 1.249258  |
| C  | 4.135089  | 1.099883  | -1.062448 |
| H  | 2.770384  | -0.214133 | -2.075702 |
| C  | 3.719242  | 1.425831  | 1.316836  |
| C  | 4.463171  | 1.679940  | 0.164433  |
| H  | 4.725630  | 1.313455  | -1.948345 |
| H  | 4.000494  | 1.903523  | 2.249165  |
| H  | 5.317988  | 2.348667  | 0.232173  |
| O  | 1.838332  | 0.258635  | 2.300158  |
| C  | 2.125643  | 0.834828  | 3.563202  |
| H  | 2.054743  | 1.928480  | 3.523622  |
| H  | 1.364928  | 0.447924  | 4.241793  |
| H  | 3.120726  | 0.539614  | 3.918801  |

**trans-7<sub>o-OMe</sub>**

E = -2106.213995 a.u.

|    |           |           |           |
|----|-----------|-----------|-----------|
| Pd | -0.148788 | -0.018959 | -0.381108 |
| S  | -0.032502 | -2.341920 | -0.268856 |

|   |           |           |           |                                |           |           |           |
|---|-----------|-----------|-----------|--------------------------------|-----------|-----------|-----------|
| S | -0.221541 | 2.304501  | -0.488497 | C                              | -3.782753 | -0.156703 | 0.306899  |
| O | -2.057620 | -0.058407 | 2.002850  | C                              | -4.595091 | -0.396213 | 1.416893  |
| O | 1.962314  | -0.139824 | -0.521250 | C                              | -4.379658 | 0.277113  | -0.886996 |
| O | 2.322173  | 1.190520  | 1.277055  | C                              | -5.972956 | -0.206011 | 1.356443  |
| O | -1.229571 | -3.232010 | -0.197943 | H                              | -4.126615 | -0.739842 | 2.334133  |
| O | 0.867776  | 2.968265  | -1.266547 | C                              | -5.749601 | 0.469523  | -0.961593 |
| F | 4.373816  | -1.175338 | 0.462917  | C                              | -6.556683 | 0.230378  | 0.160854  |
| F | 4.597883  | 0.345404  | -1.076094 | H                              | -6.578041 | -0.401553 | 2.235444  |
| F | 4.951567  | 0.848665  | 1.002188  | H                              | -6.226220 | 0.797528  | -1.880735 |
| C | -2.150995 | -0.111890 | -0.348387 | H                              | -3.755581 | 0.447777  | -1.758599 |
| C | -2.837689 | -0.136769 | 0.877279  | O                              | -7.884905 | 0.448509  | -0.012562 |
| C | -4.232379 | -0.226115 | 0.907111  | C                              | -8.749164 | 0.199125  | 1.076817  |
| H | -4.769167 | -0.242839 | 1.850447  | H                              | -9.755515 | 0.425331  | 0.719274  |
| C | -4.948400 | -0.306517 | -0.289792 | H                              | -8.705735 | -0.851078 | 1.394483  |
| C | -4.282973 | -0.300180 | -1.509761 | H                              | -8.516835 | 0.845277  | 1.933982  |
| C | -2.886406 | -0.203025 | -1.528584 |                                |           |           |           |
| H | -2.368101 | -0.204945 | -2.486263 |                                |           |           |           |
| C | -2.688345 | -0.204104 | 3.260153  | <b>TS4<sub>p-OMe</sub></b>     |           |           |           |
| H | -3.398515 | 0.610839  | 3.456396  | E = -1741.582072 a.u.          |           |           |           |
| H | -1.889149 | -0.167005 | 4.002927  | Pd                             | 0.318736  | -0.658195 | -0.334825 |
| H | -3.212976 | -1.165232 | 3.336270  | S                              | -2.477935 | -1.957998 | 0.456052  |
| C | 2.676785  | 0.471176  | 0.351675  | F                              | -1.434851 | 3.583053  | -0.928486 |
| C | 4.178392  | 0.139482  | 0.180212  | F                              | -2.110671 | 3.588084  | 1.130379  |
| C | 1.006448  | -2.854267 | -1.655775 | F                              | -3.335343 | 2.669212  | -0.413095 |
| H | 1.273507  | -3.905806 | -1.515760 | O                              | -0.460240 | 1.200809  | -0.529470 |
| H | 1.883613  | -2.203272 | -1.688275 | O                              | -1.586362 | -1.571081 | -0.752451 |
| H | 0.404234  | -2.738799 | -2.559920 | O                              | 1.417394  | -2.404008 | -0.155476 |
| C | 1.062419  | -2.744815 | 1.111768  | O                              | -1.893207 | 0.811551  | 1.185185  |
| H | 0.563982  | -2.408530 | 2.023251  | O                              | 3.646914  | -2.233346 | 0.424021  |
| H | 2.017485  | -2.233173 | 0.982139  | C                              | -1.413696 | 1.483313  | 0.272955  |
| H | 1.183610  | -3.832045 | 1.125209  | C                              | -2.064001 | 2.860970  | 0.003881  |
| C | -0.246821 | 2.949820  | 1.195806  | C                              | -4.057385 | -1.131826 | 0.157579  |
| H | 0.702916  | 2.641146  | 1.637231  | C                              | -2.987558 | -3.646207 | 0.039292  |
| H | -1.084105 | 2.498336  | 1.734211  | C                              | 2.537635  | -1.962951 | 0.122323  |
| H | -0.331352 | 4.039214  | 1.140302  | H                              | -4.791481 | -1.500706 | 0.880825  |
| C | -1.789999 | 2.968901  | -1.094335 | H                              | -3.878064 | -0.067593 | 0.317641  |
| H | -1.697616 | 4.058606  | -1.071366 | H                              | -4.380711 | -1.327281 | -0.868858 |
| H | -2.617419 | 2.613904  | -0.477376 | H                              | -3.725673 | -3.996243 | 0.767744  |
| H | -1.918360 | 2.623946  | -2.121807 | H                              | -3.395984 | -3.669897 | -0.975052 |
| H | -4.836609 | -0.375723 | -2.442042 | H                              | -2.092258 | -4.270434 | 0.091407  |
| H | -6.032290 | -0.381127 | -0.255579 | C                              | -2.179434 | 0.037234  | -0.040247 |
|   |           |           |           | C                              | 2.932520  | 0.422725  | -1.173056 |
|   |           |           |           | C                              | 2.523270  | 0.618584  | 1.209285  |
|   |           |           |           | C                              | 3.998815  | 1.305097  | -1.074711 |
|   |           |           |           | H                              | 2.680798  | 0.100599  | -2.147742 |
|   |           |           |           | C                              | 3.578770  | 1.497986  | 1.320467  |
|   |           |           |           | C                              | 4.328038  | 1.844871  | 0.178830  |
|   |           |           |           | H                              | 4.562135  | 1.570602  | -1.962631 |
|   |           |           |           | H                              | 3.854994  | 1.942415  | 2.271984  |
|   |           |           |           | H                              | 1.949499  | 0.359916  | 2.095804  |
|   |           |           |           | O                              | 5.342257  | 2.701683  | 0.394371  |
|   |           |           |           | C                              | 6.134486  | 3.114705  | -0.706975 |
|   |           |           |           | H                              | 6.877801  | 3.799181  | -0.296009 |
|   |           |           |           | H                              | 6.642851  | 2.262186  | -1.173829 |
|   |           |           |           | H                              | 5.530729  | 3.639906  | -1.457089 |
|   |           |           |           |                                |           |           |           |
|   |           |           |           | <b>trans-7<sub>p-OMe</sub></b> |           |           |           |
|   |           |           |           | E = -2106.210959 a.u.          |           |           |           |
|   |           |           |           | Pd                             | -0.114985 | -0.069912 | -0.369362 |
|   |           |           |           | S                              | 0.009725  | -2.398140 | -0.367470 |
|   |           |           |           | S                              | -0.188904 | 2.257286  | -0.460255 |
|   |           |           |           | O                              | 1.999130  | -0.172357 | -0.515093 |
|   |           |           |           | O                              | 2.255735  | 1.101184  | 1.337417  |
|   |           |           |           | O                              | -1.182043 | -3.297808 | -0.369460 |
|   |           |           |           | O                              | 0.932211  | 2.921871  | -1.190201 |
|   |           |           |           | F                              | 4.422559  | -1.152241 | 0.488763  |
|   |           |           |           | F                              | 4.634373  | 0.446931  | -0.970663 |
|   |           |           |           | F                              | 4.903368  | 0.864601  | 1.139151  |
|   |           |           |           | C                              | -2.115354 | -0.132932 | -0.287312 |
|   |           |           |           | C                              | -2.786599 | -0.016792 | 0.930641  |
|   |           |           |           | C                              | -4.185774 | -0.050542 | 1.000669  |
|   |           |           |           | C                              | -4.933802 | -0.208827 | -0.168877 |
|   |           |           |           | C                              | -4.269227 | -0.333811 | -1.396942 |
|   |           |           |           | C                              | -2.880966 | -0.298706 | -1.451450 |
|   |           |           |           | H                              | -2.395607 | -0.407438 | -2.419592 |
|   |           |           |           | C                              | 2.667948  | 0.431250  | 0.397415  |

  

|                            |           |           |           |  |  |  |  |
|----------------------------|-----------|-----------|-----------|--|--|--|--|
| <b>2OS<sub>p-OMe</sub></b> |           |           |           |  |  |  |  |
| E = -2294.732031 a.u.      |           |           |           |  |  |  |  |
| Pd                         | 0.360845  | -0.240346 | -0.500367 |  |  |  |  |
| S                          | 0.229359  | -2.476219 | -0.166232 |  |  |  |  |
| S                          | 0.088539  | 2.684226  | 0.283076  |  |  |  |  |
| F                          | 4.997451  | 0.398434  | -1.049960 |  |  |  |  |
| F                          | 4.843343  | -1.170181 | 0.449025  |  |  |  |  |
| F                          | 5.275058  | 0.870934  | 1.048416  |  |  |  |  |
| O                          | 2.389864  | -0.409750 | -0.439124 |  |  |  |  |
| O                          | 0.504226  | 1.788150  | -0.926426 |  |  |  |  |
| O                          | -1.628177 | -0.019396 | -0.631634 |  |  |  |  |
| O                          | -0.995051 | -3.221410 | -0.569142 |  |  |  |  |
| O                          | 2.644869  | 1.267426  | 1.074478  |  |  |  |  |
| O                          | -1.808293 | -0.816986 | 1.466435  |  |  |  |  |
| C                          | 1.644246  | -3.241900 | -0.987071 |  |  |  |  |
| C                          | 0.606267  | -2.809411 | 1.563946  |  |  |  |  |
| C                          | 3.049104  | 0.393623  | 0.320815  |  |  |  |  |
| C                          | 4.569789  | 0.126841  | 0.194554  |  |  |  |  |
| C                          | 1.311976  | 4.008031  | 0.245573  |  |  |  |  |
| C                          | -1.347288 | 3.580873  | -0.350412 |  |  |  |  |
| C                          | -2.309015 | -0.370330 | 0.430612  |  |  |  |  |
| H                          | 2.555692  | -2.704669 | -0.719682 |  |  |  |  |
| H                          | 1.672926  | -4.293353 | -0.688259 |  |  |  |  |
| H                          | 1.461010  | -3.162922 | -2.061179 |  |  |  |  |
| H                          | 1.570844  | -2.359209 | 1.812684  |  |  |  |  |
| H                          | -0.200716 | -2.340560 | 2.129603  |  |  |  |  |
| H                          | 0.619948  | -3.894534 | 1.702470  |  |  |  |  |
| H                          | 1.017547  | 4.785059  | 0.957664  |  |  |  |  |
| H                          | 2.253785  | 3.548581  | 0.551806  |  |  |  |  |
| H                          | 1.383246  | 4.407798  | -0.769790 |  |  |  |  |
| H                          | -1.653471 | 4.336188  | 0.380212  |  |  |  |  |
| H                          | -1.103461 | 4.037991  | -1.313480 |  |  |  |  |
| H                          | -2.138433 | 2.838250  | -0.476811 |  |  |  |  |

|   |           |           |           |
|---|-----------|-----------|-----------|
| C | 4.185246  | 0.165784  | 0.260321  |
| C | 1.073963  | -2.821395 | -1.766048 |
| H | 1.348180  | -3.876970 | -1.681459 |
| H | 1.945638  | -2.162421 | -1.750172 |
| H | 0.483413  | -2.660857 | -2.671025 |
| C | 1.090963  | -2.878249 | 1.000123  |
| H | 0.575393  | -2.619151 | 1.927411  |
| H | 2.038398  | -2.342149 | 0.920738  |
| H | 1.232056  | -3.961528 | 0.940369  |
| C | -0.284793 | 2.906209  | 1.220822  |
| H | 0.627816  | 2.569067  | 1.716513  |
| H | -1.173818 | 2.499511  | 1.710661  |
| H | -0.326791 | 3.997666  | 1.157736  |
| C | -1.731586 | 2.915673  | -1.135181 |
| H | -1.649230 | 4.006090  | -1.106596 |
| H | -2.584323 | 2.551923  | -0.559245 |
| H | -1.805885 | 2.571479  | -2.168519 |
| H | -4.864527 | -0.467017 | -2.296307 |
| H | -2.229825 | 0.091006  | 1.860441  |
| H | -4.669464 | 0.037313  | 1.968331  |
| O | -6.292237 | -0.254490 | -0.222658 |
| C | -7.007028 | -0.162611 | 0.990023  |
| H | -8.063593 | -0.225422 | 0.722954  |
| H | -6.758061 | -0.987542 | 1.671186  |
| H | -6.820849 | 0.793013  | 1.499823  |

#### ZOS<sub>m-OMe</sub>

E = -2294.729951 a.u.

|    |           |           |           |
|----|-----------|-----------|-----------|
| Pd | 0.332600  | -0.259809 | -0.497282 |
| S  | 0.225440  | -2.495969 | -0.164668 |
| S  | -0.018608 | 2.672254  | 0.238137  |
| F  | 4.966329  | 0.430325  | -1.029956 |
| F  | 4.819331  | -1.141178 | 0.466767  |
| F  | 5.216800  | 0.905506  | 1.071182  |
| O  | 2.363790  | -0.402181 | -0.456190 |
| O  | 0.453289  | 1.766094  | -0.942520 |
| O  | -1.659395 | -0.044619 | -0.604707 |
| O  | -0.988593 | -3.252148 | -0.577705 |
| O  | 2.580353  | 1.245469  | 1.094878  |
| O  | -1.846535 | -0.897931 | 1.470490  |
| C  | 1.652020  | -3.243928 | -0.981720 |
| C  | 0.599678  | -2.836497 | 1.565074  |
| C  | 3.005099  | 0.395483  | 0.325556  |
| C  | 4.530460  | 0.152332  | 0.209973  |
| C  | 1.217983  | 3.984064  | 0.261656  |
| C  | -1.412157 | 3.577561  | -0.471440 |
| C  | -2.338380 | -0.414175 | 0.449319  |
| H  | 2.558707  | -2.705422 | -0.701188 |
| H  | 1.682862  | -4.298063 | -0.692652 |
| H  | 1.478369  | -3.155179 | -2.056626 |
| H  | 1.551164  | -2.364706 | 1.824540  |
| H  | -0.221782 | -2.394557 | 2.131439  |
| H  | 0.640243  | -3.922251 | 1.692825  |
| H  | 0.900007  | 4.761649  | 0.962929  |
| H  | 2.139768  | 3.512141  | 0.608075  |
| H  | 1.340690  | 4.386810  | -0.747567 |
| H  | -1.738280 | 4.348262  | 0.234031  |
| H  | -1.118382 | 4.016563  | -1.428964 |
| H  | -2.208951 | 2.845513  | -0.621921 |
| C  | -3.817227 | -0.172366 | 0.339288  |
| C  | -4.624756 | -0.436258 | 1.453704  |
| C  | -4.385439 | 0.309683  | -0.838120 |
| C  | -5.991946 | -0.210524 | 1.372290  |
| H  | -4.161138 | -0.817638 | 2.357059  |
| C  | -5.764835 | 0.534532  | -0.913589 |
| C  | -6.573395 | 0.275053  | 0.197352  |
| H  | -6.627797 | -0.413604 | 2.230569  |
| H  | -7.645017 | 0.440594  | 0.159878  |
| H  | -3.768864 | 0.497551  | -1.710548 |
| O  | -6.219300 | 1.007097  | -2.106961 |
| C  | -7.606851 | 1.217927  | -2.250823 |
| H  | -7.752785 | 1.575042  | -3.272269 |
| H  | -8.175535 | 0.288628  | -2.109651 |
| H  | -7.978502 | 1.976612  | -1.547989 |

#### TS4<sub>m-OMe</sub>

E = -1741.575810 a.u.

|    |           |           |           |
|----|-----------|-----------|-----------|
| Pd | 0.403807  | -0.729648 | -0.409829 |
| S  | -2.382967 | -1.817373 | 0.634137  |
| F  | -1.231244 | 3.461085  | -1.479781 |
| F  | -1.868536 | 3.737883  | 0.572820  |
| F  | -3.146264 | 2.673425  | -0.827333 |
| O  | -0.327070 | 1.110063  | -0.815088 |
| O  | -1.530457 | -1.612071 | -0.648216 |
| O  | 1.453115  | -2.465109 | -0.105285 |
| O  | -1.719617 | 0.988149  | 0.970416  |
| O  | 3.729130  | -2.316526 | -0.440116 |
| C  | -1.247010 | 1.524651  | -0.030116 |
| C  | -1.862948 | 2.878144  | -0.456433 |
| C  | -3.957971 | -1.006660 | 0.278420  |
| C  | -2.929611 | -3.535840 | 0.462235  |
| C  | 2.598150  | -2.011734 | -0.270635 |
| H  | -4.669897 | -1.257878 | 1.070843  |
| H  | -3.755692 | 0.065399  | 0.284253  |
| H  | -4.322538 | -1.334357 | -0.699256 |
| H  | -3.646926 | -3.770882 | 1.254827  |
| H  | -3.373316 | 0.686911  | -0.525905 |
| H  | -2.042043 | -4.164132 | 0.568796  |
| C  | 2.316141  | -0.061996 | -0.177161 |
| C  | 2.938397  | 0.608021  | -1.257321 |
| C  | 2.653360  | 0.291564  | 1.142877  |
| C  | 3.874794  | 1.593498  | -0.999624 |
| H  | 2.680999  | 0.346219  | -2.279408 |
| C  | 3.606143  | 1.285723  | 1.395148  |
| C  | 4.216157  | 1.934601  | 0.316096  |
| H  | 4.356931  | 2.117904  | -1.820639 |
| H  | 4.959482  | 2.706810  | 0.484681  |
| H  | 2.189059  | -0.203685 | 1.991617  |
| O  | 3.862167  | 1.544731  | 2.700733  |
| C  | 4.793768  | 2.562387  | 3.010028  |
| H  | 4.472681  | 3.535684  | 2.615775  |
| H  | 4.831967  | 2.611041  | 4.099457  |
| H  | 5.794024  | 2.324650  | 2.623892  |

#### trans-7<sub>m-OMe</sub>

E = -2106.212781 a.u.

|    |           |           |           |
|----|-----------|-----------|-----------|
| Pd | -0.144875 | -0.074948 | -0.436348 |
| S  | -0.014873 | -2.398777 | -0.543612 |
| S  | -0.214767 | 2.255952  | -0.499861 |
| O  | 1.981161  | -0.177672 | -0.421298 |
| O  | 2.041313  | 1.053129  | 1.475903  |
| O  | -1.199428 | -3.297167 | -0.684014 |
| O  | 0.964168  | 2.921251  | -1.131976 |
| F  | 4.289870  | -1.166278 | 0.875199  |
| F  | 4.641611  | 0.389591  | -0.603402 |
| F  | 4.703757  | 0.870954  | 1.508820  |
| C  | -2.144049 | -0.145357 | -0.420798 |
| C  | -2.814537 | -0.008545 | 0.793082  |
| C  | -4.217883 | -0.060914 | 0.846237  |
| C  | -4.952501 | -0.244005 | -0.328574 |
| C  | -4.270763 | -0.384832 | -1.539264 |
| C  | -2.879875 | -0.337190 | -1.598972 |
| H  | -2.378706 | -0.461057 | -2.555849 |
| C  | 2.551063  | 0.405362  | 0.568334  |
| C  | 4.074951  | 0.143416  | 0.585803  |
| C  | 1.148288  | -2.745578 | -1.882951 |
| H  | 1.415251  | -3.805447 | -1.838156 |
| H  | 2.015942  | -2.091921 | -1.766463 |
| H  | 0.624450  | -2.531523 | -2.817481 |
| C  | 0.965060  | -2.949746 | 0.872116  |
| H  | 0.374585  | -2.752315 | 1.769535  |
| H  | 1.906315  | -2.397374 | 0.898555  |
| H  | 1.129183  | -4.025637 | 0.760287  |
| C  | -0.459228 | 2.913652  | 1.162338  |
| H  | 0.405230  | 2.581272  | 1.740017  |
| H  | -1.387330 | 2.509264  | 1.575388  |
| H  | -0.495323 | 4.004575  | 1.088067  |
| C  | -1.695971 | 2.904625  | -1.308478 |
| H  | -1.630317 | 3.995604  | -1.265840 |
| H  | -2.592590 | 2.526942  | -0.813453 |

|   |           |           |           |
|---|-----------|-----------|-----------|
| H | -1.671951 | 2.567267  | -2.346509 |
| H | -4.842743 | -0.539268 | -2.451728 |
| H | -6.036107 | -0.288110 | -0.313726 |
| H | -2.281915 | 0.119313  | 1.733358  |
| O | -4.761128 | 0.083351  | 2.084442  |
| C | -6.165264 | -0.009919 | 2.208080  |
| H | -6.381736 | 0.105831  | 3.271763  |
| H | -6.675505 | 0.785554  | 1.647965  |
| H | -6.535758 | -0.985794 | 1.867366  |

**2OS<sub>o-NO2</sub>**

E = -2384.668854 a.u.

|    |           |           |           |
|----|-----------|-----------|-----------|
| Pd | 0.552167  | -0.229009 | -0.290700 |
| S  | 0.578825  | -2.453071 | 0.157853  |
| S  | 0.171694  | 2.858524  | 0.133915  |
| F  | 5.086765  | 0.585420  | -1.250229 |
| F  | 5.128730  | -1.089583 | 0.137666  |
| F  | 5.552015  | 0.920782  | 0.840689  |
| O  | 2.573923  | -0.322180 | -0.491265 |
| O  | 0.600566  | 1.758344  | -0.891860 |
| O  | -1.454787 | -0.134747 | -0.233775 |
| O  | -0.638671 | -3.278497 | -0.083062 |
| O  | 2.925244  | 1.141484  | 1.207471  |
| O  | -1.489527 | -1.019495 | 1.846657  |
| C  | 1.933271  | -3.195799 | -0.777217 |
| C  | 1.153008  | -2.688691 | 1.850083  |
| C  | 3.283522  | 0.401367  | 0.303451  |
| C  | 4.791448  | 0.212520  | 0.004951  |
| C  | 1.647500  | 3.887058  | 0.299014  |
| C  | -0.827651 | 3.971815  | -0.874552 |
| C  | -2.034724 | -0.573640 | 0.842039  |
| H  | 2.849907  | -2.626752 | -0.616685 |
| H  | 2.021771  | -4.236139 | -0.452306 |
| H  | 1.645023  | -3.154773 | -1.830107 |
| H  | 2.097118  | -2.154715 | 1.985999  |
| H  | 0.372748  | -2.263914 | 2.483618  |
| H  | 1.269471  | -3.763012 | 2.020696  |
| H  | 1.401412  | 4.753776  | 0.920590  |
| H  | 2.397373  | 3.264431  | 0.792575  |
| H  | 1.993320  | 4.198226  | -0.690855 |
| H  | -0.992930 | 4.895686  | -0.311749 |
| H  | -0.301319 | 4.169971  | -1.812416 |
| H  | -1.786547 | 3.484049  | -1.055321 |
| C  | -3.540583 | -0.603227 | 0.720973  |
| C  | -4.189663 | -1.806140 | 1.005848  |
| C  | -4.324649 | 0.454467  | 0.250991  |
| C  | -5.562870 | -1.942174 | 0.812021  |
| H  | -3.591951 | -2.637445 | 1.365613  |
| C  | -5.693748 | 0.334372  | 0.033590  |
| C  | -6.316381 | -0.875605 | 0.321338  |
| H  | -6.045477 | -2.888969 | 1.038578  |
| H  | -6.249753 | 1.188427  | -0.337756 |
| H  | -7.386545 | -0.980801 | 0.168807  |
| N  | -3.724840 | 1.765568  | 0.028122  |
| O  | -4.143731 | 2.439537  | -0.906832 |
| O  | -2.855299 | 2.127186  | 0.813746  |

**TS4<sub>o-NO2</sub>**

E = -1831.516431 a.u.

|    |           |           |           |
|----|-----------|-----------|-----------|
| Pd | 0.288197  | -0.724429 | -0.288794 |
| S  | -2.491697 | -1.899390 | 0.442344  |
| F  | -0.605996 | 3.805090  | 0.523255  |
| F  | -2.732137 | 3.444641  | 0.760553  |
| F  | -1.831677 | 3.328461  | -1.208441 |
| O  | -0.303140 | 1.194498  | -0.342688 |
| O  | -1.620410 | -1.469265 | -0.778777 |
| O  | 1.244504  | -2.534148 | -0.270617 |
| O  | -2.101872 | 0.886234  | 1.009329  |
| O  | 3.435084  | -2.518391 | 0.449512  |
| C  | -1.354009 | 1.551205  | 0.302754  |
| C  | -1.639217 | 3.059951  | 0.095237  |
| C  | -4.116204 | -1.198158 | 0.089663  |
| C  | -2.852753 | -3.632406 | 0.062599  |
| C  | 2.360499  | -2.150258 | 0.115335  |
| H  | -4.840222 | -1.612831 | 0.797767  |

|   |           |           |           |
|---|-----------|-----------|-----------|
| H | -4.015059 | -0.122406 | 0.240753  |
| H | -4.394120 | -1.429735 | -0.942334 |
| H | -3.570586 | -4.020431 | 0.792052  |
| H | -3.242226 | -3.718223 | -0.955681 |
| H | -1.909978 | -4.178196 | 0.147229  |
| C | 2.264197  | -0.205488 | 0.052664  |
| C | 2.893391  | 0.268605  | -1.115774 |
| C | 2.615464  | 0.427735  | 1.262897  |
| C | 3.815488  | 1.313973  | -1.072939 |
| H | 2.650487  | -0.193853 | -2.069276 |
| C | 3.526806  | 1.466184  | 1.328312  |
| C | 4.130133  | 1.908005  | 0.146959  |
| H | 4.282858  | 1.665931  | -1.988251 |
| H | 3.755421  | 1.918789  | 2.286445  |
| H | 4.848617  | 2.721668  | 0.188975  |
| N | 2.019453  | -0.031385 | 2.531397  |
| O | 1.425929  | -1.104030 | 2.526613  |
| O | 2.169578  | 0.678661  | 3.514191  |

**trans-7<sub>o-NO2</sub>**

E = -2196.160247 a.u.

|    |           |           |           |
|----|-----------|-----------|-----------|
| Pd | -0.109223 | 0.032253  | -0.329356 |
| S  | -0.020480 | -2.304213 | -0.408814 |
| S  | -0.103865 | 2.367818  | -0.345695 |
| O  | 1.977622  | -0.130624 | -0.450452 |
| O  | 2.457896  | 1.199291  | 1.322021  |
| O  | -1.249969 | -3.151368 | -0.470187 |
| O  | 0.985070  | 3.015004  | -1.136069 |
| F  | 4.334727  | -1.312505 | 0.416646  |
| F  | 4.628161  | 0.255805  | -1.061532 |
| F  | 5.048151  | 0.645884  | 1.029271  |
| C  | -2.108131 | -0.056047 | -0.392985 |
| C  | -2.944888 | -0.206233 | 0.721123  |
| C  | -4.337004 | -0.298855 | 0.621825  |
| H  | -4.922480 | -0.411647 | 1.527222  |
| C  | -4.931382 | -0.258513 | -0.630441 |
| C  | -4.129517 | -0.123284 | -1.766026 |
| C  | -2.744555 | -0.019259 | -1.643094 |
| H  | -2.143685 | 0.083849  | -2.544200 |
| C  | 2.745811  | 0.445973  | 0.404313  |
| C  | 4.219398  | 0.022206  | 0.194292  |
| C  | 1.074768  | -2.747588 | -1.774218 |
| H  | 1.313961  | -3.811697 | -1.690915 |
| H  | 1.964273  | -2.115850 | -1.719850 |
| H  | 0.520892  | -2.559007 | -2.696723 |
| C  | 0.980239  | -2.824188 | 1.000725  |
| H  | 0.442294  | -2.518517 | 1.900534  |
| H  | 1.955565  | -2.336846 | 0.949704  |
| H  | 1.068309  | -3.913661 | 0.954928  |
| C  | -0.066813 | 2.968179  | 1.355228  |
| H  | 0.872407  | 2.601230  | 1.773324  |
| H  | -0.917023 | 2.553765  | 1.903399  |
| H  | -0.097442 | 4.061408  | 1.326250  |
| C  | -1.663510 | 3.106400  | -0.887710 |
| H  | -1.531671 | 4.190820  | -0.833228 |
| H  | -2.487761 | 2.769460  | -0.255761 |
| H  | -1.834189 | 2.801831  | -1.921652 |
| H  | -4.584315 | -0.101519 | -2.753522 |
| H  | -6.010283 | -0.341154 | -0.721945 |
| N  | -2.383296 | -0.289597 | 2.073086  |
| O  | -1.162321 | -0.417307 | 2.198710  |
| O  | -3.153087 | -0.227979 | 3.021716  |

**2OS<sub>p-NO2</sub>**

E = -2384.674588 a.u.

|    |           |           |           |
|----|-----------|-----------|-----------|
| Pd | 0.327893  | -0.210074 | -0.478618 |
| S  | 0.181871  | -2.442131 | -0.124989 |
| S  | 0.132438  | 2.750898  | 0.265902  |
| F  | 4.975080  | 0.347466  | -1.021982 |
| F  | 4.779995  | -1.202745 | 0.491517  |
| F  | 5.248898  | 0.835542  | 1.073551  |
| O  | 2.348996  | -0.403282 | -0.418836 |
| O  | 0.487624  | 1.810265  | -0.929999 |
| O  | -1.666968 | 0.007248  | -0.620986 |
| O  | -1.058522 | -3.167311 | -0.514553 |



|   |           |           |           |   |           |           |           |
|---|-----------|-----------|-----------|---|-----------|-----------|-----------|
| O | 2.626586  | 1.282756  | 1.079277  | S | 0.003570  | -2.370545 | -0.580148 |
| O | -1.888676 | -0.752956 | 1.489951  | S | -0.072048 | 2.290373  | -0.530522 |
| C | 1.581773  | -3.233853 | -0.944929 | O | 2.027082  | -0.192105 | -0.460827 |
| C | 0.559646  | -2.760629 | 1.607507  | O | 2.080340  | 1.022233  | 1.444623  |
| C | 3.020455  | 0.394976  | 0.337166  | O | -1.213589 | -3.222815 | -0.721364 |
| C | 4.536109  | 0.097005  | 0.222381  | O | 1.145529  | 2.907816  | -1.133450 |
| C | 1.406743  | 4.023724  | 0.183864  | F | 4.318763  | -1.215216 | 0.811427  |
| C | -1.271037 | 3.694506  | -0.372511 | F | 4.695091  | 0.387178  | -0.611140 |
| C | -2.356923 | -0.336722 | 0.429766  | F | 4.738508  | 0.797189  | 1.517016  |
| H | 2.501547  | -2.707948 | -0.683482 | C | -2.080182 | -0.080471 | -0.453379 |
| H | 1.595823  | -4.282991 | -0.637090 | C | -2.770088 | 0.037309  | 0.763406  |
| H | 1.396435  | -3.160885 | -2.019089 | C | -4.162709 | 0.005315  | 0.804231  |
| H | 1.532896  | -2.324727 | 1.847645  | C | -4.863449 | -0.146162 | -0.388353 |
| H | -0.236450 | -2.273541 | 2.173254  | C | -4.210179 | -0.278274 | -1.610626 |
| H | 0.554908  | -3.844067 | 1.758987  | C | -2.818598 | -0.245074 | -1.634850 |
| H | 1.146067  | 4.829915  | 0.876431  | H | -2.310417 | -0.356452 | -2.589777 |
| H | 2.333118  | 3.538883  | 0.497193  | C | 2.596742  | 0.378045  | 0.538756  |
| H | 1.484187  | 4.393028  | -0.842470 | C | 4.117696  | 0.104494  | 0.563685  |
| H | -1.540138 | 4.474456  | 0.346650  | C | 1.153108  | -2.744506 | -1.923150 |
| H | -1.017298 | 4.124752  | -1.345269 | H | 1.386783  | -3.812391 | -1.884069 |
| H | -2.094270 | 2.984901  | -0.481160 | H | 2.041515  | -2.119409 | -1.804796 |
| C | -3.843530 | -0.160525 | 0.264491  | H | 0.635765  | -2.509947 | -2.856313 |
| C | -4.668372 | -0.383542 | 1.372725  | C | 0.966596  | -2.952567 | 0.834094  |
| C | -4.406828 | 0.217177  | -0.960466 | H | 0.382966  | -2.741576 | 1.732844  |
| C | -6.044397 | -0.224115 | 1.268871  | H | 1.923611  | -2.427910 | 0.861213  |
| H | -4.208843 | -0.685356 | 2.308178  | H | 1.099681  | -4.032320 | 0.718979  |
| C | -5.782558 | 0.378182  | -1.079416 | C | -0.339801 | 2.960252  | 1.123555  |
| C | -6.578956 | 0.157826  | 0.041041  | H | 0.499234  | 2.606154  | 1.725181  |
| H | -6.705536 | -0.389059 | 2.111637  | H | -1.290022 | 2.584784  | 1.513027  |
| H | -6.246154 | 0.665900  | -2.015866 | H | -0.343439 | 4.051393  | 1.045273  |
| H | -3.758339 | 0.371940  | -1.816183 | C | -1.507919 | 2.984506  | -1.381746 |
| N | -8.031437 | 0.334527  | -0.075876 | H | -1.404282 | 4.072862  | -1.348519 |
| O | -8.475156 | 0.681737  | -1.163746 | H | -2.431291 | 2.650558  | -0.904731 |
| O | -8.710143 | 0.126840  | 0.922464  | H | -1.472010 | 2.638026  | -2.416634 |
|   |           |           |           | H | -4.792889 | -0.406913 | -2.516030 |
|   |           |           |           | H | -2.222794 | 0.141730  | 1.698236  |
|   |           |           |           | H | -4.708559 | 0.092603  | 1.737234  |
|   |           |           |           | N | -6.327064 | -0.168382 | -0.356090 |
|   |           |           |           | O | -6.872824 | -0.047495 | 0.734684  |
|   |           |           |           | O | -6.916454 | -0.301685 | -1.422131 |

**TS4<sub>p-NO2</sub>**

E = -1831.515168 a.u.

|    |           |           |           |
|----|-----------|-----------|-----------|
| Pd | 0.396432  | -0.769974 | -0.301161 |
| S  | -2.451432 | -1.907617 | 0.445653  |
| F  | -1.071098 | 3.567747  | -0.900231 |
| F  | -1.883156 | 3.580282  | 1.109103  |
| F  | -3.034716 | 2.719952  | -0.522023 |
| O  | -0.263395 | 1.120426  | -0.517058 |
| O  | -1.525540 | -1.546881 | -0.753586 |
| O  | 1.366440  | -2.557951 | -0.104961 |
| O  | -1.730485 | 0.817419  | 1.182981  |
| O  | 3.613484  | -2.464879 | 0.398331  |
| C  | -1.211389 | 1.461420  | 0.274274  |
| C  | -1.788845 | 2.865721  | -0.019923 |
| C  | -3.985699 | -1.011588 | 0.123648  |
| C  | -3.013926 | -3.570741 | 0.005706  |
| C  | 2.507324  | -2.132185 | 0.140180  |
| H  | -4.745438 | -1.350112 | 0.834979  |
| H  | -3.763094 | 0.043481  | 0.289435  |
| H  | -4.301551 | -1.190670 | -0.907883 |
| H  | -3.778350 | -3.894976 | 0.718687  |
| H  | -3.404254 | -3.572045 | -1.015855 |
| H  | -2.144545 | -4.229255 | 0.071454  |
| C  | 2.337391  | -0.178447 | 0.041622  |
| C  | 3.029547  | 0.306235  | -1.091195 |
| C  | 2.596400  | 0.405785  | 1.302564  |
| C  | 3.950167  | 1.339060  | -0.974542 |
| H  | 2.843451  | -0.133431 | -2.067605 |
| C  | 3.513982  | 1.438897  | 1.432185  |
| C  | 4.174508  | 1.881986  | 0.288041  |
| H  | 4.488969  | 1.730886  | -1.829388 |
| H  | 3.725040  | 1.906219  | 2.387061  |
| H  | 2.073212  | 0.043538  | 2.183460  |
| N  | 5.153813  | 2.975354  | 0.419784  |
| O  | 5.334115  | 3.436570  | 1.538397  |
| O  | 5.721125  | 3.347379  | -0.598202 |

**trans-7<sub>p-NO2</sub>**

E = -2196.156297 a.u.

|    |           |           |           |
|----|-----------|-----------|-----------|
| Pd | -0.081478 | -0.046132 | -0.468328 |
|----|-----------|-----------|-----------|

**2OS<sub>m-NO2</sub>**

E = -2384.674712 a.u.

|    |           |           |           |
|----|-----------|-----------|-----------|
| Pd | 0.333182  | -0.198751 | -0.493910 |
| S  | 0.194632  | -2.432878 | -0.146135 |
| S  | 0.119368  | 2.744051  | 0.286044  |
| F  | 4.985750  | 0.386126  | -1.004442 |
| F  | 4.781183  | -1.191736 | 0.478700  |
| F  | 5.244358  | 0.835383  | 1.101958  |
| O  | 2.354352  | -0.385689 | -0.423024 |
| O  | 0.486365  | 1.825896  | -0.924123 |
| O  | -1.663516 | 0.007108  | -0.644023 |
| O  | -1.040349 | -3.164102 | -0.542049 |
| O  | 2.623930  | 1.292893  | 1.085292  |
| O  | -1.868843 | -0.736552 | 1.473829  |
| C  | 1.601648  | -3.216796 | -0.961526 |
| C  | 0.567052  | -2.749820 | 1.587807  |
| C  | 3.021455  | 0.408668  | 0.340891  |
| C  | 4.538042  | 0.112475  | 0.232134  |
| C  | 1.383518  | 4.028180  | 0.230995  |
| C  | -1.290925 | 3.684579  | -0.341724 |
| C  | -2.346505 | -0.336049 | 0.412191  |
| H  | 2.518527  | -2.688938 | -0.693751 |
| H  | 1.617157  | -4.266995 | -0.657482 |
| H  | 1.421732  | -3.140273 | -2.036368 |
| H  | 1.527623  | -2.290157 | 1.834407  |
| H  | -0.243216 | -2.282862 | 2.150731  |
| H  | 0.587635  | -3.833326 | 1.737291  |
| H  | 1.111134  | 4.822356  | 0.932858  |
| H  | 2.311083  | 3.545774  | 0.544527  |
| H  | 1.466401  | 4.412607  | -0.789328 |
| H  | -1.570943 | 4.448975  | 0.389817  |
| H  | -1.039013 | 4.134024  | -1.306262 |
| H  | -2.105531 | 2.967400  | -0.464975 |
| C  | -3.834421 | -0.180802 | 0.250034  |

|   |           |           |           |
|---|-----------|-----------|-----------|
| C | -4.645311 | -0.381302 | 1.367952  |
| C | -4.414922 | 0.151944  | -0.979447 |
| C | -6.019354 | -0.234585 | 1.231532  |
| H | -4.203162 | -0.648568 | 2.320290  |
| C | -5.798422 | 0.286687  | -1.093521 |
| C | -6.615483 | 0.096497  | 0.016601  |
| H | -6.243603 | 0.537781  | -2.052110 |
| H | -7.693399 | 0.195196  | -0.039034 |
| H | -3.770804 | 0.292186  | -1.841537 |
| N | -6.875974 | -0.434437 | 2.407248  |
| O | -6.330961 | -0.721427 | 3.464906  |
| O | -8.084652 | -0.298375 | 2.256314  |

**TS4<sub>m-NO2</sub>**

E = -1831.516544 a.u.

|    |           |           |           |
|----|-----------|-----------|-----------|
| Pd | 0.384002  | -0.711217 | -0.296041 |
| S  | -2.437904 | -1.947087 | 0.374066  |
| F  | -1.208457 | 3.599733  | -0.726999 |
| F  | -1.893814 | 3.542429  | 1.328613  |
| F  | -3.141075 | 2.729410  | -0.255843 |
| O  | -0.318827 | 1.172378  | -0.427751 |
| O  | -1.518941 | -1.499540 | -0.800583 |
| O  | 1.388267  | -2.490517 | -0.144679 |
| O  | -1.761142 | 0.761122  | 1.270682  |
| O  | 3.514243  | -2.366091 | 0.740558  |
| C  | -1.265092 | 1.456687  | 0.387232  |
| C  | -1.867629 | 2.864874  | 0.172009  |
| C  | -3.986793 | -1.057896 | 0.107149  |
| C  | -2.974625 | -3.589474 | -0.164777 |
| C  | 2.469424  | -2.053318 | 0.281633  |
| H  | -4.740631 | -1.451160 | 0.796298  |
| H  | -3.781371 | -0.011250 | 0.336715  |
| H  | -4.300387 | -1.179212 | -0.933482 |
| H  | -3.732909 | -3.968203 | 0.527564  |
| H  | -3.366150 | -3.534648 | -1.184376 |
| H  | -2.094782 | -4.236782 | -0.139485 |
| C  | 2.309761  | -0.101307 | 0.061578  |
| C  | 3.024700  | 0.271613  | -1.094630 |
| C  | 2.561135  | 0.587933  | 1.270919  |
| C  | 3.954620  | 1.298153  | -1.011916 |
| H  | 2.868170  | -0.226353 | -2.046053 |
| C  | 3.493344  | 1.616943  | 1.325944  |
| C  | 4.200841  | 1.977721  | 0.178680  |
| H  | 3.674832  | 2.145116  | 2.257427  |
| H  | 4.938331  | 2.772511  | 0.189745  |
| H  | 2.015877  | 0.306266  | 2.167992  |
| N  | 4.702743  | 1.684824  | -2.217478 |
| O  | 5.508951  | 2.599176  | -2.109662 |
| O  | 4.470623  | 1.065674  | -3.246527 |

**trans-7<sub>m-NO2</sub>**

E = -2196.156628 a.u.

|    |           |           |           |
|----|-----------|-----------|-----------|
| Pd | -0.093551 | -0.045765 | -0.475289 |
| S  | 0.014510  | -2.366082 | -0.643211 |
| S  | -0.113008 | 2.289893  | -0.475855 |
| O  | 2.016576  | -0.170724 | -0.478510 |
| O  | 2.096165  | 0.999553  | 1.454401  |
| O  | -1.193348 | -3.219489 | -0.849108 |
| O  | 1.083109  | 2.932211  | -1.096187 |
| F  | 4.302137  | -1.241518 | 0.784763  |
| F  | 4.686052  | 0.353376  | -0.643653 |
| F  | 4.756280  | 0.766274  | 1.483105  |
| C  | -2.094440 | -0.108242 | -0.449235 |
| C  | -2.769779 | 0.046851  | 0.764433  |
| C  | -4.163162 | -0.016761 | 0.787487  |
| C  | -4.918568 | -0.239271 | -0.358393 |
| C  | -4.242404 | -0.401538 | -1.564119 |
| C  | -2.847454 | -0.337237 | -1.610170 |
| H  | -2.347018 | -0.478679 | -2.565374 |
| C  | 2.597990  | 0.372160  | 0.529494  |
| C  | 4.116098  | 0.080920  | 0.537531  |
| C  | 1.213512  | -2.716044 | -1.948664 |
| H  | 1.450023  | -3.783450 | -1.915037 |
| H  | 2.093405  | -2.088216 | -1.790722 |
| H  | 0.728437  | -2.471116 | -2.896412 |

|   |           |           |           |
|---|-----------|-----------|-----------|
| C | 0.924434  | -2.969924 | 0.796287  |
| H | 0.309230  | -2.771564 | 1.676732  |
| H | 1.880309  | -2.446562 | 0.865731  |
| H | 1.062539  | -4.047892 | 0.670331  |
| C | -0.344354 | 2.927514  | 1.195854  |
| C | 0.511601  | 2.567463  | 1.769409  |
| H | -1.281672 | 2.544302  | 1.608188  |
| H | -0.353318 | 4.019787  | 1.135311  |
| C | -1.575405 | 2.983794  | -1.281865 |
| H | -1.488638 | 4.072432  | -1.221312 |
| H | -2.484702 | 2.622193  | -0.798044 |
| H | -1.551497 | 2.665154  | -2.326064 |
| H | -4.805154 | -0.585383 | -2.475538 |
| H | -5.999119 | -0.284608 | -0.291079 |
| H | -2.245435 | 0.204078  | 1.701781  |
| N | -4.854924 | 0.167081  | 2.069855  |
| O | -4.169141 | 0.421338  | 3.053971  |
| O | -6.074732 | 0.063392  | 2.077010  |

**2OS<sub>o-Me</sub>**

E = -2219.552031 a.u.

|    |           |           |           |
|----|-----------|-----------|-----------|
| Pd | -0.602846 | -0.074433 | 0.423359  |
| S  | -0.552213 | -2.327903 | 0.616432  |
| S  | -0.285189 | 2.578936  | -1.035638 |
| F  | -5.202808 | 0.864178  | 0.957632  |
| F  | -5.137605 | -1.030321 | -0.109322 |
| F  | -5.545818 | 0.811205  | -1.183276 |
| O  | -2.636190 | -0.172483 | 0.470344  |
| O  | -0.653133 | 2.002085  | 0.368520  |
| O  | 1.400323  | 0.067086  | 0.447378  |
| O  | 0.669976  | -2.990406 | 1.152754  |
| O  | -2.912318 | 1.139467  | -1.365737 |
| O  | 1.432206  | -1.088451 | -1.478450 |
| C  | -1.960669 | -2.840856 | 1.622860  |
| C  | -0.980640 | -3.044457 | -0.980202 |
| C  | -3.306375 | 0.464150  | -0.425841 |
| C  | -4.826823 | 0.280481  | -0.192823 |
| C  | -1.462305 | 3.928724  | -1.243021 |
| C  | 1.212318  | 3.533567  | -0.698557 |
| C  | 2.010045  | -0.507494 | -0.556108 |
| H  | -2.864661 | -2.348631 | 1.259892  |
| H  | -2.026655 | -3.931206 | 1.573017  |
| H  | -1.744371 | -2.524637 | 2.645954  |
| H  | -1.941178 | -2.638388 | -1.308384 |
| H  | -0.179469 | -2.742765 | -1.657551 |
| H  | -1.021962 | -4.131197 | -0.861329 |
| H  | -1.182121 | 4.511516  | -2.125835 |
| H  | -2.433940 | 3.454306  | -1.393017 |
| H  | -1.464568 | 4.549798  | -0.342963 |
| H  | 1.503197  | 4.080865  | -1.600694 |
| H  | 1.038271  | 4.215042  | 0.138782  |
| H  | 1.984343  | 2.806855  | -0.435504 |
| C  | 3.506551  | -0.361560 | -0.551578 |
| C  | 4.124402  | -0.412267 | -1.808386 |
| C  | 4.286264  | -0.193012 | 0.613947  |
| C  | 5.500228  | -0.268131 | -1.942426 |
| H  | 3.493137  | -0.576535 | -2.676523 |
| C  | 5.672264  | -0.067973 | 0.453668  |
| C  | 6.278229  | -0.092598 | -0.799956 |
| H  | 5.960810  | -0.302341 | -2.926403 |
| H  | 6.289877  | 0.046556  | 1.342136  |
| H  | 7.357528  | 0.013610  | -0.880616 |
| C  | 3.713054  | -0.179195 | 2.007781  |
| H  | 3.141296  | 0.734769  | 2.198740  |
| H  | 3.023326  | -1.013223 | 2.167187  |
| H  | 4.518139  | -0.244752 | 2.747523  |

**TS4<sub>o-Me</sub>**

E = -1666.404258 a.u.

|    |           |           |           |
|----|-----------|-----------|-----------|
| Pd | 0.358871  | -0.685552 | -0.308807 |
| S  | -2.469604 | -1.947141 | 0.327054  |
| F  | -1.242166 | 3.649279  | -0.641560 |
| F  | -2.100520 | 3.510818  | 1.343123  |
| F  | -3.175071 | 2.698765  | -0.363090 |
| O  | -0.360502 | 1.205355  | -0.401174 |

|   |           |           |           |
|---|-----------|-----------|-----------|
| O | -1.567683 | -1.473402 | -0.844193 |
| O | 1.380479  | -2.473787 | -0.200727 |
| O | -1.805107 | 0.771192  | 1.290794  |
| O | 3.378955  | -2.378702 | 0.950685  |
| C | -1.314539 | 1.472191  | 0.405969  |
| C | -1.947512 | 2.865068  | 0.178104  |
| C | -4.027432 | -1.060178 | 0.102554  |
| C | -3.014395 | -3.581996 | -0.230819 |
| C | 2.407621  | -2.060764 | 0.355523  |
| H | -4.768455 | -1.466881 | 0.797830  |
| H | -3.820846 | -0.016903 | 0.346147  |
| H | -4.358853 | -1.163447 | -0.934538 |
| H | -3.762665 | -3.974202 | 0.465020  |
| H | -3.419776 | -3.511258 | -1.244149 |
| H | -2.133411 | -4.228342 | -0.228964 |
| C | 2.256499  | -0.081736 | 0.066676  |
| C | 3.027724  | 0.128023  | -1.099757 |
| C | 2.578712  | 0.619133  | 1.263643  |
| C | 4.107935  | 1.003633  | -1.096189 |
| H | 2.773491  | -0.412740 | -2.008962 |
| C | 3.664554  | 1.490753  | 1.241363  |
| C | 4.419441  | 1.683126  | 0.080102  |
| H | 4.697586  | 1.156477  | -1.995788 |
| H | 3.928639  | 2.035026  | 2.145351  |
| H | 5.261081  | 2.371378  | 0.100311  |
| C | 1.796951  | 0.402765  | 2.529049  |
| H | 2.134794  | 1.076099  | 3.322844  |
| H | 0.723919  | 0.556999  | 2.373937  |
| H | 1.927101  | -0.626786 | 2.887543  |

**trans-7<sub>o-Me</sub>**

E = -2031.035508 a.u.

|    |           |           |           |
|----|-----------|-----------|-----------|
| Pd | -0.088360 | 0.079081  | -0.324943 |
| S  | -0.236853 | 2.387424  | -0.061987 |
| S  | -0.024690 | -2.221473 | -0.744201 |
| O  | -2.214675 | 0.160988  | -0.337017 |
| O  | -2.274945 | -1.318920 | 1.372063  |
| O  | 0.945014  | 3.293689  | 0.050463  |
| O  | -1.211240 | -2.772174 | -1.466143 |
| F  | -4.575758 | 0.915552  | 1.006289  |
| F  | -4.858200 | -0.468957 | -0.647219 |
| F  | -4.938265 | -1.191370 | 1.394688  |
| C  | 1.917236  | 0.167785  | -0.333797 |
| C  | 2.661988  | 0.059322  | 0.853659  |
| C  | 4.062044  | 0.090736  | 0.767176  |
| C  | 4.715645  | 0.255760  | -0.451101 |
| C  | 3.969461  | 0.399824  | -1.619191 |
| C  | 2.576093  | 0.352973  | -1.554903 |
| H  | 2.000650  | 0.461623  | -2.473091 |
| C  | -2.786917 | -0.563862 | 0.551678  |
| C  | -4.317554 | -0.345483 | 0.572526  |
| C  | -1.282372 | 2.935186  | -1.431018 |
| H  | -1.561302 | 3.978281  | -1.254894 |
| H  | -2.153618 | 2.277218  | -1.485202 |
| H  | -0.680582 | 2.857654  | -2.339448 |
| C  | -1.346903 | 2.724332  | 1.325423  |
| H  | -0.844010 | 2.382540  | 2.232614  |
| H  | -2.287006 | 2.189508  | 1.180354  |
| H  | -1.496954 | 3.807275  | 1.365431  |
| C  | 0.211317  | -3.127410 | 0.798863  |
| H  | -0.639632 | -2.863382 | 1.429530  |
| H  | 1.154257  | -2.817853 | 1.257264  |
| H  | 0.213732  | -4.195038 | 0.559842  |
| C  | 1.447843  | -2.769695 | -1.639181 |
| H  | 1.364264  | -3.854768 | -1.749437 |
| H  | 2.351590  | -2.479645 | -1.100255 |
| H  | 1.429581  | -2.292024 | -2.620566 |
| H  | 4.464614  | 0.546406  | -2.576327 |
| H  | 5.801870  | 0.280482  | -0.486019 |
| H  | 4.646223  | -0.004041 | 1.681480  |
| C  | 2.007912  | -0.023171 | 2.211880  |
| H  | 2.610967  | -0.607254 | 2.917019  |
| H  | 1.895980  | 0.981641  | 2.641754  |
| H  | 1.006503  | -0.466208 | 2.165483  |

**2OS<sub>p-Me</sub>**

E = -2219.556767 a.u.

|    |           |           |           |
|----|-----------|-----------|-----------|
| Pd | -0.588097 | -0.255164 | 0.426170  |
| S  | -0.641399 | -2.518497 | 0.400389  |
| S  | -0.154463 | 2.505522  | -0.773188 |
| F  | -5.122678 | 0.823417  | 1.123226  |
| F  | -5.176170 | -0.941369 | -0.147187 |
| F  | -5.495161 | 1.027632  | -1.003524 |
| O  | -2.623343 | -0.265527 | 0.498958  |
| O  | -0.554976 | 1.817479  | 0.570386  |
| O  | 1.416632  | -0.180849 | 0.420656  |
| O  | 0.548658  | -3.296672 | 0.841801  |
| O  | -2.850265 | 1.201273  | -1.223023 |
| O  | 1.414843  | -1.262936 | -1.554096 |
| C  | -2.056435 | -3.051955 | 1.387672  |
| C  | -1.143192 | -3.049820 | -1.246532 |
| C  | -3.269066 | 0.475715  | -0.332504 |
| C  | -4.794192 | 0.352024  | -0.093327 |
| C  | -1.278134 | 3.912796  | -0.859433 |
| C  | 1.376783  | 3.366261  | -0.347368 |
| C  | 2.004332  | -0.721717 | -0.615686 |
| H  | -2.941087 | -2.484820 | 1.093386  |
| H  | -2.178385 | -4.128343 | 1.238724  |
| H  | -1.804670 | -2.844371 | 2.430277  |
| H  | -2.087977 | -2.565216 | -1.506525 |
| H  | -0.341382 | -2.723475 | -1.911086 |
| H  | -1.239115 | -4.139544 | -1.233567 |
| H  | -0.974616 | 4.560034  | -1.687985 |
| H  | -2.266701 | 3.490282  | -1.049391 |
| H  | -1.258804 | 4.451771  | 0.091859  |
| H  | 1.688714  | 3.988510  | -1.192084 |
| H  | 1.225513  | 3.968320  | 0.552931  |
| H  | 2.120924  | 2.589058  | -0.158574 |
| C  | 3.498392  | -0.606766 | -0.598159 |
| C  | 4.221507  | -1.045283 | -1.712263 |
| C  | 4.190582  | -0.078219 | 0.497010  |
| C  | 5.608149  | -0.949679 | -1.731796 |
| H  | 3.675255  | -1.465930 | -2.551000 |
| C  | 5.579163  | 0.011680  | 0.470697  |
| C  | 6.311334  | -0.416755 | -0.643407 |
| H  | 6.158372  | -1.298744 | -2.603550 |
| H  | 3.632617  | 0.242884  | 1.371158  |
| H  | 6.106889  | 0.414493  | 1.333156  |
| C  | 7.811655  | -0.290428 | -0.679699 |
| H  | 8.116977  | 0.660543  | -1.136885 |
| H  | 8.241720  | -0.320398 | 0.326978  |
| H  | 8.267974  | -1.093674 | -1.268150 |

**TS4<sub>p-Me</sub>**

E = -1666.404197 a.u.

|    |           |           |           |
|----|-----------|-----------|-----------|
| Pd | 0.356494  | -0.695482 | -0.311452 |
| S  | -2.477196 | -1.911483 | 0.432762  |
| F  | -1.291496 | 3.571995  | -0.982098 |
| F  | -1.916933 | 3.639599  | 1.091937  |
| F  | -3.212369 | 2.741880  | -0.405779 |
| O  | -0.360713 | 1.184032  | -0.524983 |
| O  | -1.561806 | -1.540889 | -0.764880 |
| O  | 1.384336  | -2.465408 | -0.100577 |
| O  | -1.833830 | 0.840702  | 1.164718  |
| O  | 3.585003  | -2.344388 | 0.578802  |
| C  | -1.320894 | 1.496057  | 0.258784  |
| C  | -1.925561 | 2.891873  | -0.022424 |
| C  | -4.032393 | -1.048371 | 0.114127  |
| C  | -3.016505 | -3.586967 | 0.003859  |
| C  | 2.500674  | -2.035096 | 0.222592  |
| H  | -4.784291 | -1.400960 | 0.827072  |
| H  | -3.829831 | 0.011211  | 0.277742  |
| H  | -4.346211 | -1.235623 | -0.916729 |
| H  | -3.770705 | -3.923366 | 0.722175  |
| H  | -3.412849 | -3.598695 | -1.015438 |
| H  | -2.135102 | -4.229835 | 0.065022  |
| C  | 2.251736  | -0.062348 | 0.018155  |
| C  | 3.012253  | 0.305811  | -1.116429 |
| C  | 2.552435  | 0.561512  | 1.252604  |
| C  | 4.038633  | 1.233943  | -1.013229 |

|   |          |           |           |
|---|----------|-----------|-----------|
| H | 2.794150 | -0.149101 | -2.080111 |
| C | 3.577992 | 1.488083  | 1.345783  |
| C | 4.340843 | 1.834550  | 0.217645  |
| H | 4.614866 | 1.504798  | -1.895255 |
| H | 3.796320 | 1.959911  | 2.301456  |
| H | 1.973466 | 0.307108  | 2.137141  |
| C | 5.475900 | 2.812043  | 0.336194  |
| H | 6.400531 | 2.294174  | 0.625202  |
| H | 5.669538 | 3.321654  | -0.612915 |
| H | 5.275009 | 3.569102  | 1.101196  |

**trans-7<sub>p-Me</sub>**

E = -2031.037606 a.u.

|    |           |           |           |
|----|-----------|-----------|-----------|
| Pd | -0.097341 | 0.111551  | -0.381041 |
| S  | -0.250646 | 2.430739  | -0.232483 |
| S  | -0.011784 | -2.198748 | -0.706578 |
| O  | -2.222361 | 0.187347  | -0.329813 |
| O  | -2.223380 | -1.249110 | 1.417071  |
| O  | 0.924460  | 3.350288  | -0.293531 |
| O  | -1.200807 | -2.802374 | -1.380136 |
| F  | -4.524389 | 0.989491  | 1.078939  |
| F  | -4.878700 | -0.439441 | -0.522472 |
| F  | -4.883394 | -1.103369 | 1.540745  |
| C  | 1.902303  | 0.194805  | -0.378194 |
| C  | 2.608936  | -0.062589 | 0.801357  |
| C  | 4.006386  | -0.021997 | 0.817576  |
| C  | 4.736299  | 0.280425  | -0.335649 |
| C  | 4.020966  | 0.543907  | -1.510074 |
| C  | 2.626610  | 0.505392  | -1.534507 |
| H  | 2.109572  | 0.722684  | -2.467250 |
| C  | -2.763136 | -0.512888 | 0.598205  |
| C  | -4.290542 | -0.284826 | 0.671654  |
| C  | -1.439745 | 2.908734  | -1.507421 |
| H  | -1.711485 | 3.955944  | -1.345788 |
| H  | -2.302112 | 2.240340  | -1.446761 |
| H  | -0.931991 | 2.799157  | -2.468497 |
| C  | -1.212188 | 2.817288  | 1.249167  |
| H  | -0.606898 | 2.529512  | 2.111571  |
| H  | -2.149156 | 2.257296  | 1.229377  |
| H  | -1.385665 | 3.897453  | 1.256758  |
| C  | 0.280128  | -3.034448 | 0.866078  |
| H  | -0.574358 | -2.781681 | 1.496538  |
| H  | 1.212955  | -2.663439 | 1.299156  |
| H  | 0.328858  | -4.109550 | 0.669629  |
| C  | 1.453606  | -2.740371 | -1.616905 |
| H  | 1.395021  | -3.829814 | -1.696058 |
| H  | 2.360273  | -2.414086 | -1.104154 |
| H  | 1.402872  | -2.289333 | -2.609935 |
| H  | 4.562395  | 0.789021  | -2.422545 |
| H  | 2.077739  | -0.288222 | 1.725062  |
| H  | 4.534409  | -0.225068 | 1.748059  |
| C  | 6.241086  | 0.355881  | -0.310934 |
| H  | 6.679760  | -0.038491 | -1.234444 |
| H  | 6.583016  | 1.394203  | -0.208088 |
| H  | 6.658276  | -0.209526 | 0.529013  |

**2OS<sub>m-Me</sub>**

E = -2219.556271 a.u.

|    |           |           |           |
|----|-----------|-----------|-----------|
| Pd | -0.557566 | -0.204602 | 0.416906  |
| S  | -0.576011 | -2.467901 | 0.447956  |
| S  | -0.182578 | 2.530585  | -0.859194 |
| F  | -5.100535 | 0.823436  | 1.158579  |
| F  | -5.141341 | -0.977044 | -0.061184 |
| F  | -5.503928 | 0.961655  | -0.967876 |
| O  | -2.590611 | -0.238945 | 0.531790  |
| O  | -0.551736 | 1.871623  | 0.507844  |
| O  | 1.445200  | -0.100822 | 0.375906  |
| O  | 0.630501  | -3.214045 | 0.899890  |
| O  | -2.867040 | 1.166540  | -1.233444 |
| O  | 1.439739  | -1.232954 | -1.570287 |
| C  | -1.975286 | -3.001604 | 1.457452  |
| C  | -1.080287 | -3.049749 | -1.181120 |
| C  | -3.260781 | 0.464301  | -0.313216 |
| C  | -4.780143 | 0.323531  | -0.046603 |
| C  | -1.335955 | 3.911788  | -0.969757 |

|   |           |           |           |
|---|-----------|-----------|-----------|
| C | 1.336410  | 3.432759  | -0.477867 |
| C | 2.029568  | -0.656569 | -0.653737 |
| H | -2.872610 | -2.460027 | 1.153543  |
| H | -2.076504 | -4.083712 | 1.337030  |
| H | -1.722751 | -2.761654 | 2.492873  |
| H | -2.032649 | -2.584153 | -1.448367 |
| H | -0.286876 | -2.731547 | -1.859595 |
| H | -1.162432 | -4.139809 | -1.137928 |
| H | -1.056108 | 4.541714  | -1.819717 |
| H | -2.317702 | 3.463813  | -1.135354 |
| H | -1.316474 | 4.477417  | -0.034087 |
| H | 1.624268  | 4.037920  | -1.343287 |
| H | 1.185247  | 4.055952  | 0.407947  |
| H | 2.098819  | 2.676014  | -0.278951 |
| C | 3.523760  | -0.513654 | -0.659115 |
| C | 4.234203  | -0.962314 | -1.775798 |
| C | 4.210963  | 0.059741  | 0.417108  |
| C | 5.619064  | -0.828277 | -1.810215 |
| H | 3.684751  | -1.409604 | -2.598021 |
| C | 5.601366  | 0.193073  | 0.397461  |
| C | 6.294785  | -0.254147 | -0.734720 |
| H | 6.176779  | -1.171764 | -2.678130 |
| H | 7.378222  | -0.154133 | -0.771026 |
| H | 3.643409  | 0.390764  | 1.282375  |
| C | 6.341977  | 0.778570  | 1.572544  |
| H | 5.668522  | 1.332519  | 2.234505  |
| H | 6.816645  | -0.008421 | 2.173128  |
| H | 7.136480  | 1.460767  | 1.248446  |

**TS4<sub>m-Me</sub>**

E = -1666.402919 a.u.

|    |           |           |           |
|----|-----------|-----------|-----------|
| Pd | 0.369606  | -0.714909 | -0.307929 |
| S  | -2.475343 | -1.918114 | 0.402169  |
| F  | -1.267801 | 3.563021  | -0.919514 |
| F  | -1.828002 | 3.622988  | 1.173673  |
| F  | -3.182835 | 2.758968  | -0.291057 |
| O  | -0.330592 | 1.174660  | -0.479247 |
| O  | -1.553791 | -1.530729 | -0.786242 |
| O  | 1.377125  | -2.494764 | -0.127584 |
| O  | -1.812830 | 0.808593  | 1.197453  |
| O  | 3.521030  | -2.391500 | 0.715077  |
| C  | -1.291983 | 1.478000  | 0.306463  |
| C  | -1.883133 | 2.885080  | 0.053693  |
| C  | -4.022434 | -1.036047 | 0.096036  |
| C  | -3.026531 | -3.580141 | -0.061776 |
| C  | 2.471063  | -2.070124 | 0.275068  |
| H  | -4.779526 | -1.397373 | 0.799004  |
| H  | -3.812396 | 0.018326  | 0.282164  |
| H  | -4.333947 | -1.199921 | -0.939462 |
| H  | -3.785360 | -3.924558 | 0.647818  |
| H  | -3.420264 | -3.568340 | -1.082072 |
| H  | -2.150501 | -4.231178 | -0.010937 |
| C  | 2.277685  | -0.105538 | 0.035015  |
| C  | 3.043065  | 0.212451  | -1.108405 |
| C  | 2.558560  | 0.556609  | 1.253118  |
| C  | 4.065142  | 1.151798  | -1.020881 |
| H  | 2.838109  | -0.284888 | -2.053488 |
| C  | 3.575370  | 1.500852  | 1.351363  |
| C  | 4.323885  | 1.782356  | 0.194787  |
| H  | 4.660522  | 1.397551  | -1.896365 |
| H  | 5.127391  | 2.514565  | 0.252785  |
| H  | 1.966290  | 0.317178  | 2.133938  |
| C  | 3.875647  | 2.206440  | 2.647347  |
| H  | 4.891307  | 1.980670  | 2.994877  |
| H  | 3.804965  | 3.294586  | 2.532219  |
| H  | 3.177883  | 1.907235  | 3.435026  |

**trans-7<sub>m-Me</sub>**

E = -2031.037705 a.u.

|    |           |           |           |
|----|-----------|-----------|-----------|
| Pd | -0.100170 | 0.104648  | -0.375433 |
| S  | -0.248216 | 2.424092  | -0.213550 |
| S  | -0.021870 | -2.203759 | -0.712888 |
| O  | -2.227622 | 0.188240  | -0.332141 |
| O  | -2.248081 | -1.252208 | 1.411268  |
| O  | 0.929720  | 3.341311  | -0.249104 |

|   |           |           |           |                               |           |           |           |
|---|-----------|-----------|-----------|-------------------------------|-----------|-----------|-----------|
| O | -1.206634 | -2.797552 | -1.402544 | C                             | -5.911513 | 0.581899  | -0.689731 |
| F | -4.537736 | 0.987542  | 1.082430  | C                             | -6.669364 | -0.208141 | 0.166366  |
| F | -4.882117 | -0.406141 | -0.551691 | H                             | -6.620352 | -1.623092 | 1.792124  |
| F | -4.911387 | -1.112746 | 1.497000  | H                             | -6.393142 | 1.219859  | -1.424509 |
| C | 1.899865  | 0.185847  | -0.371654 | H                             | -7.753235 | -0.195640 | 0.093221  |
| C | 2.596042  | -0.064824 | 0.814631  | C                             | -3.812289 | 1.447645  | -1.503721 |
| C | 3.999067  | -0.018284 | 0.866007  | N                             | -3.369349 | 2.232332  | -2.240040 |
| C | 4.696012  | 0.286500  | -0.306424 |                               |           |           |           |
| C | 4.011597  | 0.546980  | -1.493104 |                               |           |           |           |
| C | 2.617851  | 0.499364  | -1.531459 | <b>TS4<sub>o-CN</sub></b>     |           |           |           |
| H | 2.099514  | 0.717789  | -2.462810 | E = -1719.294781 a.u.         |           |           |           |
| C | -2.778336 | -0.512503 | 0.589334  | Pd                            | 0.340310  | -0.744514 | -0.295757 |
| C | -4.305581 | -0.279330 | 0.651278  | S                             | -2.486571 | -1.829907 | 0.509562  |
| C | -1.413613 | 2.909834  | -1.507250 | F                             | -0.894902 | 3.644269  | -1.000722 |
| H | -1.686149 | 3.957044  | -1.346846 | F                             | -2.921564 | 2.866711  | -0.927968 |
| H | -2.278178 | 2.243080  | -1.463388 | O                             | -0.276237 | 1.154846  | -0.552303 |
| H | -0.889445 | 2.802230  | -2.459682 | O                             | -1.580128 | -1.519545 | -0.720927 |
| C | -1.234808 | 2.806999  | 1.252434  | O                             | 1.299506  | -2.544333 | -0.124540 |
| H | -0.647260 | 2.511016  | 2.124257  | O                             | -1.922881 | 0.945444  | 0.993814  |
| H | -2.174294 | 2.252576  | 1.212372  | O                             | 3.575468  | -2.483038 | 0.235883  |
| H | -1.401903 | 3.888147  | 1.262653  | C                             | -1.285240 | 1.566030  | 0.134872  |
| C | 0.246374  | -3.046187 | 0.860425  | C                             | -1.764035 | 2.968883  | -0.241305 |
| H | -0.612486 | -2.788293 | 1.482853  | C                             | -4.059308 | -1.035861 | 0.116272  |
| H | 1.177151  | -2.682562 | 1.304116  | C                             | -2.967444 | -3.548098 | 0.203467  |
| H | 0.289383  | -4.121203 | 0.661943  | C                             | 2.457217  | -2.136262 | 0.061633  |
| C | 1.450877  | -2.751768 | -1.606885 | H                             | -4.806690 | -1.354943 | 0.849283  |
| H | 1.388296  | -3.840848 | -1.687114 | H                             | -3.883526 | 0.037430  | 0.203085  |
| H | 2.353043  | -2.429414 | -1.083749 | H                             | -4.359527 | -1.307697 | -0.899573 |
| H | 1.413790  | -2.300154 | -2.600241 | H                             | -3.715750 | -3.850972 | -0.942498 |
| H | 4.567271  | 0.798162  | -2.394047 | H                             | -3.355791 | -3.651233 | -0.813645 |
| H | 5.782892  | 0.331524  | -0.287869 | H                             | -2.067129 | -4.155982 | 0.320842  |
| H | 2.049273  | -0.284831 | 1.732147  | C                             | 2.289550  | -0.180869 | 0.043668  |
| C | 4.725968  | -0.302629 | 2.155820  | C                             | 2.955452  | 0.361905  | -1.074014 |
| H | 4.716393  | -1.374557 | 2.394271  | C                             | 2.597478  | 0.353655  | 1.327398  |
| H | 5.773095  | 0.011550  | 2.101232  | C                             | 3.882254  | 1.389513  | -0.932320 |
| H | 4.261682  | 0.220064  | 2.999979  | H                             | 2.736258  | -0.033023 | -2.062848 |
|   |           |           |           | C                             | 3.533917  | 1.379959  | 1.468392  |
|   |           |           |           | C                             | 4.169606  | 1.892894  | 0.337457  |
|   |           |           |           | H                             | 4.378889  | 1.801302  | -1.806368 |
|   |           |           |           | H                             | 3.758251  | 1.774015  | 2.454863  |
|   |           |           |           | H                             | 4.895439  | 2.693321  | 0.451987  |
|   |           |           |           | C                             | 1.962547  | -0.177035 | 2.497323  |
|   |           |           |           | N                             | 1.474134  | -0.615176 | 3.458388  |
|   |           |           |           |                               |           |           |           |
|   |           |           |           | <b>trans-7<sub>o-CN</sub></b> |           |           |           |
|   |           |           |           | E = -2083.937878 a.u.         |           |           |           |
|   |           |           |           | Pd                            | -0.067161 | 0.022233  | -0.366362 |
|   |           |           |           | S                             | -0.214091 | 2.324117  | -0.002702 |
|   |           |           |           | S                             | 0.025247  | -2.292638 | -0.662285 |
|   |           |           |           | O                             | -2.165741 | 0.134028  | -0.393609 |
|   |           |           |           | O                             | -2.586545 | -1.444165 | 1.179613  |
|   |           |           |           | O                             | 0.987148  | 3.210881  | 0.015875  |
|   |           |           |           | O                             | -1.036117 | -2.879325 | -1.533345 |
|   |           |           |           | F                             | -4.516622 | 1.138522  | 0.668354  |
|   |           |           |           | F                             | -4.825943 | -0.220413 | -1.001703 |
|   |           |           |           | F                             | -5.189860 | -0.896140 | 1.025895  |
|   |           |           |           | C                             | 1.926859  | 0.176058  | -0.470695 |
|   |           |           |           | C                             | 2.736493  | 0.151744  | 0.683403  |
|   |           |           |           | C                             | 4.132213  | 0.301427  | 0.600597  |
|   |           |           |           | C                             | 4.733152  | 0.482507  | -0.638135 |
|   |           |           |           | C                             | 3.943716  | 0.521348  | -1.788763 |
|   |           |           |           | C                             | 2.558505  | 0.368811  | -1.703755 |
|   |           |           |           | H                             | 1.964771  | 0.409638  | -2.614885 |
|   |           |           |           | C                             | -2.905588 | -0.574405 | 0.383287  |
|   |           |           |           | C                             | -4.389891 | -0.152269 | 0.264761  |
|   |           |           |           | C                             | -1.412254 | -2.975829 | -1.186118 |
|   |           |           |           | H                             | -1.662178 | 3.997851  | -0.887116 |
|   |           |           |           | H                             | -2.284002 | 2.317885  | -1.194055 |
|   |           |           |           | H                             | -0.920173 | 2.980990  | -2.161524 |
|   |           |           |           | C                             | -1.123754 | 2.533936  | 1.543793  |
|   |           |           |           | H                             | -0.516849 | 2.092895  | 2.338124  |
|   |           |           |           | H                             | -2.088406 | 2.028725  | 1.467225  |
|   |           |           |           | H                             | -1.243263 | 3.609115  | 1.707591  |
|   |           |           |           | C                             | 0.008162  | -3.088424 | 0.956485  |
|   |           |           |           | H                             | -0.955794 | -2.828757 | 1.398323  |

  

|                           |           |           |           |  |  |  |  |
|---------------------------|-----------|-----------|-----------|--|--|--|--|
| <b>2OS<sub>o-CN</sub></b> |           |           |           |  |  |  |  |
| E = -2272.452610 a.u.     |           |           |           |  |  |  |  |
| Pd                        | 0.301929  | -0.199670 | -0.484603 |  |  |  |  |
| S                         | 0.191839  | -2.409846 | 0.003821  |  |  |  |  |
| S                         | -0.226952 | 2.864281  | -0.252765 |  |  |  |  |
| F                         | 4.916406  | 0.439646  | -1.033269 |  |  |  |  |
| F                         | 4.789769  | -1.254296 | 0.326277  |  |  |  |  |
| F                         | 5.211623  | 0.732442  | 1.094364  |  |  |  |  |
| O                         | 2.324875  | -0.372075 | -0.530837 |  |  |  |  |
| O                         | 0.514141  | 1.771108  | -1.086668 |  |  |  |  |
| O                         | -1.699186 | 0.010866  | -0.562932 |  |  |  |  |
| O                         | -1.045692 | -3.180077 | -0.303334 |  |  |  |  |
| O                         | 2.567925  | 0.979527  | 1.278252  |  |  |  |  |
| O                         | -1.884690 | -0.782029 | 1.538950  |  |  |  |  |
| C                         | 1.569971  | -3.231765 | -0.824203 |  |  |  |  |
| C                         | 0.636724  | -2.633401 | 1.735858  |  |  |  |  |
| C                         | 2.982235  | 0.285391  | 0.362678  |  |  |  |  |
| C                         | 4.504121  | 0.059984  | 0.185628  |  |  |  |  |
| C                         | 1.111363  | 3.782023  | 0.540033  |  |  |  |  |
| C                         | -0.710201 | 4.056085  | -1.514413 |  |  |  |  |
| C                         | -2.365510 | -0.352346 | 0.490316  |  |  |  |  |
| H                         | 2.500413  | -2.705611 | -0.606411 |  |  |  |  |
| H                         | 1.584428  | -4.270171 | -0.481938 |  |  |  |  |
| H                         | 1.358510  | -3.192639 | -1.895263 |  |  |  |  |
| H                         | 1.593165  | -2.140709 | 1.928529  |  |  |  |  |
| H                         | -0.163904 | -2.156181 | 2.303089  |  |  |  |  |
| H                         | 0.687657  | -3.707619 | 1.936524  |  |  |  |  |
| H                         | 0.679412  | 4.592141  | 1.135988  |  |  |  |  |
| H                         | 1.633898  | 3.065075  | 1.179379  |  |  |  |  |
| H                         | 1.794300  | 4.172655  | -0.219458 |  |  |  |  |
| H                         | -1.065553 | 4.965493  | -1.019597 |  |  |  |  |
| H                         | 0.153240  | 4.265877  | -2.151991 |  |  |  |  |
| H                         | -1.522510 | 3.597958  | -2.085812 |  |  |  |  |
| C                         | -3.861976 | -0.244429 | 0.340738  |  |  |  |  |
| C                         | -4.644615 | -1.013457 | 1.203768  |  |  |  |  |
| C                         | -4.508926 | 0.566234  | -0.614063 |  |  |  |  |
| C                         | -6.033495 | -1.006070 | 1.117026  |  |  |  |  |
| H                         | -4.129517 | -1.620112 | 1.941087  |  |  |  |  |

|   |          |           |           |
|---|----------|-----------|-----------|
| H | 0.824457 | -2.689521 | 1.565124  |
| H | 0.105101 | -4.166928 | 0.799656  |
| C | 1.615306 | -2.893940 | -1.277817 |
| H | 1.530210 | -3.982006 | -1.349759 |
| H | 2.422563 | -2.595852 | -0.605721 |
| H | 1.773065 | -2.463136 | -2.267967 |
| H | 4.407955 | 0.675518  | -2.759999 |
| H | 5.810546 | 0.602078  | -0.706617 |
| H | 4.725944 | 0.281507  | 1.510196  |
| C | 2.121862 | -0.013332 | 1.966636  |
| N | 1.611304 | -0.150991 | 3.005195  |

**2OS<sub>p-CN</sub>**

E = -2272.453522 a.u.

|    |           |           |           |
|----|-----------|-----------|-----------|
| Pd | 0.326815  | -0.206240 | -0.484640 |
| S  | 0.182445  | -2.442279 | -0.155751 |
| S  | 0.125887  | 2.741766  | 0.299639  |
| F  | 4.975801  | 0.359000  | -1.012374 |
| F  | 4.777454  | -1.206197 | 0.485198  |
| F  | 5.245827  | 0.826001  | 1.088437  |
| O  | 2.348291  | -0.397856 | -0.420669 |
| O  | 0.484743  | 1.820098  | -0.909812 |
| O  | -1.667185 | 0.010688  | -0.630161 |
| O  | -1.055327 | -3.166050 | -0.556175 |
| O  | 2.623908  | 1.275261  | 1.092447  |
| O  | -1.890615 | -0.769869 | 1.472943  |
| C  | 1.586036  | -3.223116 | -0.979980 |
| C  | 0.556018  | -2.777940 | 1.574430  |
| C  | 3.018467  | 0.393643  | 0.343345  |
| C  | 4.534283  | 0.096280  | 0.228617  |
| C  | 1.392228  | 4.023331  | 0.232104  |
| C  | -1.285107 | 3.685076  | -0.322503 |
| C  | -2.359187 | -0.343329 | 0.416668  |
| H  | 2.503995  | -2.697383 | -0.711875 |
| H  | 1.602105  | -4.275054 | -0.681962 |
| H  | 1.402556  | -3.140658 | -2.053778 |
| H  | 1.528420  | -2.343973 | 1.821470  |
| H  | -0.241896 | -2.296672 | 2.142603  |
| H  | 0.551445  | -3.862841 | 1.715113  |
| H  | 1.128427  | 4.818514  | 0.936110  |
| H  | 2.322206  | 3.539817  | 0.536689  |
| H  | 1.465180  | 4.406967  | -0.789294 |
| H  | -1.557935 | 4.452825  | 0.408299  |
| H  | -1.036417 | 4.130830  | -1.289572 |
| H  | -2.103618 | 2.971314  | -0.439442 |
| C  | -3.844210 | -0.164514 | 0.251863  |
| C  | -4.671138 | -0.396598 | 1.355998  |
| C  | -4.407577 | 0.224774  | -0.968732 |
| C  | -6.045785 | -0.234240 | 1.251403  |
| H  | -4.212771 | -0.707639 | 2.289203  |
| C  | -5.782423 | 0.387118  | -1.085709 |
| C  | -6.607675 | 0.161598  | 0.027073  |
| H  | -6.691665 | -0.411535 | 2.105874  |
| H  | -6.226259 | 0.684151  | -2.031006 |
| H  | -3.758649 | 0.387235  | -1.822896 |
| C  | -8.024048 | 0.336805  | -0.086778 |
| N  | -9.174690 | 0.483682  | -0.178558 |

**TS4<sub>p-CN</sub>**

E = -1719.295070 a.u.

|    |           |           |           |
|----|-----------|-----------|-----------|
| Pd | 0.386245  | -0.753866 | -0.298057 |
| S  | -2.463794 | -1.888677 | 0.440667  |
| F  | -1.093119 | 3.572711  | -0.946689 |
| F  | -1.861797 | 3.615619  | 1.079279  |
| F  | -3.054279 | 2.745197  | -0.516751 |
| O  | -0.273414 | 1.136595  | -0.529862 |
| O  | -1.539519 | -1.525952 | -0.758339 |
| O  | 1.351200  | -2.544187 | -0.072273 |
| O  | -1.744320 | 0.843650  | 1.168747  |
| O  | 3.560383  | -2.450340 | 0.578531  |
| C  | -1.223030 | 1.481826  | 0.256913  |
| C  | -1.797097 | 2.886351  | -0.043073 |
| C  | -3.999252 | -0.992499 | 0.124182  |
| C  | -3.028225 | -3.551212 | -0.000133 |
| C  | 2.477147  | -2.119720 | 0.235139  |

|   |           |           |           |
|---|-----------|-----------|-----------|
| H | -4.759064 | -1.337039 | 0.832601  |
| H | -3.778619 | 0.061839  | 0.297167  |
| H | -4.314328 | -1.165205 | -0.908725 |
| H | -3.791420 | -3.876181 | 0.713816  |
| H | -3.420508 | -3.551209 | -1.020961 |
| H | -2.158905 | -4.210084 | 0.063087  |
| C | 2.321758  | -0.166594 | 0.045170  |
| C | 3.042346  | 0.240005  | -1.100679 |
| C | 2.583956  | 0.476467  | 1.276796  |
| C | 3.993791  | 1.246441  | -1.023269 |
| H | 2.854092  | -0.243187 | -2.056137 |
| C | 3.531181  | 1.483810  | 1.364412  |
| C | 4.240110  | 1.868000  | 0.212042  |
| H | 4.546305  | 1.561285  | -1.903007 |
| H | 3.730940  | 1.981653  | 2.308175  |
| H | 2.038163  | 0.176664  | 2.167480  |
| C | 5.225234  | 2.902699  | 0.299553  |
| N | 6.028077  | 3.741516  | 0.371168  |

**trans-7<sub>p-CN</sub>**

E = -2083.934682 a.u.

|    |           |           |           |
|----|-----------|-----------|-----------|
| Pd | -0.085923 | 0.102446  | -0.379351 |
| S  | -0.239339 | 2.421480  | -0.233745 |
| S  | -0.026148 | -2.211131 | -0.706445 |
| O  | -2.199037 | 0.182132  | -0.336513 |
| O  | -2.191377 | -1.240164 | 1.420125  |
| O  | 0.949062  | 3.322640  | -0.294830 |
| O  | -1.231042 | -2.794206 | -1.366766 |
| F  | -4.499010 | 0.988267  | 1.071438  |
| F  | -4.852590 | -0.451593 | -0.520620 |
| F  | -4.853172 | -1.102699 | 1.546948  |
| C  | 1.911870  | 0.191995  | -0.372956 |
| C  | 2.616076  | -0.048666 | 0.815860  |
| C  | 4.007604  | 0.012851  | 0.849556  |
| C  | 4.721733  | 0.320051  | -0.317704 |
| C  | 4.025887  | 0.575738  | -1.509216 |
| C  | 2.635789  | 0.511886  | -1.530016 |
| H  | 2.117062  | 0.721335  | -2.462720 |
| C  | -2.738068 | -0.513144 | 0.598427  |
| C  | -4.265448 | -0.288245 | 0.671967  |
| C  | -1.419520 | 2.904661  | -1.513978 |
| H  | -1.683751 | 3.954164  | -1.355107 |
| H  | -2.287300 | 2.243261  | -1.454834 |
| H  | -0.909490 | 2.789687  | -2.473205 |
| C  | -1.198460 | 2.815893  | 1.246541  |
| H  | -0.595896 | 2.525982  | 2.110120  |
| H  | -2.139320 | 2.262387  | 1.226852  |
| H  | -1.364739 | 3.897176  | 1.252019  |
| C  | 0.279381  | -3.057079 | 0.857979  |
| H  | -0.563259 | -2.799910 | 1.502298  |
| H  | 1.222196  | -2.699538 | 1.280798  |
| H  | 0.314498  | -4.131490 | 0.655173  |
| C  | 1.420634  | -2.759033 | -1.641894 |
| H  | 1.351866  | -3.847119 | -1.729809 |
| H  | 2.338672  | -2.449586 | -1.138772 |
| H  | 1.360773  | -2.300552 | -2.631115 |
| H  | 4.578728  | 0.826169  | -2.410122 |
| H  | 4.545093  | -0.172834 | 1.775186  |
| H  | 2.080555  | -0.275273 | 1.735947  |
| C  | 6.151490  | 0.371153  | -0.293575 |
| N  | 7.314564  | 0.404575  | -0.275114 |

**2OS<sub>m-CN</sub>**

E = -2272.453696 a.u.

|    |           |           |           |
|----|-----------|-----------|-----------|
| Pd | 0.331899  | -0.219831 | -0.475642 |
| S  | 0.201057  | -2.455338 | -0.143680 |
| S  | 0.067059  | 2.749614  | 0.233089  |
| F  | 4.979622  | 0.386174  | -0.969375 |
| F  | 4.785621  | -1.177079 | 0.530773  |
| F  | 5.216226  | 0.863933  | 1.132938  |
| O  | 2.355761  | -0.393062 | -0.421695 |
| O  | 0.483718  | 1.799824  | -0.934414 |
| O  | -1.662389 | -0.000393 | -0.605462 |
| O  | -1.030386 | -3.188532 | -0.546163 |
| O  | 2.586676  | 1.253145  | 1.127468  |

|                               |           |           |           |                       |           |           |           |
|-------------------------------|-----------|-----------|-----------|-----------------------|-----------|-----------|-----------|
| O                             | -1.895636 | -0.848590 | 1.470581  | O                     | -2.221463 | -1.241430 | 1.417108  |
| C                             | 1.607927  | -3.222670 | -0.975100 | O                     | 0.947436  | 3.306376  | -0.341054 |
| C                             | 0.581871  | -2.799748 | 1.583590  | O                     | -1.238238 | -2.805751 | -1.368110 |
| C                             | 3.005008  | 0.393867  | 0.365238  | F                     | -4.500444 | 1.001848  | 1.083506  |
| C                             | 4.526364  | 0.120998  | 0.266542  | F                     | -4.866800 | -0.400971 | -0.538027 |
| C                             | 1.361125  | 4.005155  | 0.228192  | F                     | -4.886061 | -1.093187 | 1.515936  |
| C                             | -1.282520 | 3.708772  | -0.491165 | C                     | 1.905230  | 0.180975  | -0.361386 |
| C                             | -2.357761 | -0.384014 | 0.428176  | C                     | 2.590715  | -0.081831 | 0.827158  |
| H                             | 2.525009  | -2.698289 | -0.701774 | C                     | 3.994961  | -0.001861 | 0.875244  |
| H                             | 1.625856  | -4.277607 | -0.687949 | C                     | 4.722831  | 0.346489  | -0.270488 |
| H                             | 1.425030  | -3.129511 | -2.048118 | C                     | 4.038345  | 0.617134  | -1.450731 |
| H                             | 1.545402  | -2.348837 | 1.835240  | C                     | 2.644779  | 0.536483  | -1.497852 |
| H                             | -0.225524 | -2.341104 | 2.156958  | H                     | 2.136431  | 0.763925  | -2.432217 |
| H                             | 0.599628  | -3.885854 | 1.713597  | C                     | -2.757759 | -0.512843 | 0.590514  |
| H                             | 1.074739  | 4.811903  | 0.909903  | C                     | -4.282689 | -0.269970 | 0.660227  |
| H                             | 2.261588  | 3.504007  | 0.588636  | C                     | -1.440485 | 2.890336  | -1.516244 |
| H                             | 1.500834  | 4.378158  | -0.790165 | H                     | -1.702410 | 3.939861  | -1.353934 |
| H                             | -1.574189 | 4.503912  | 0.202092  | H                     | -2.306458 | 2.228266  | -1.444665 |
| H                             | -0.968295 | 4.120280  | -1.454320 | H                     | -0.943328 | 2.774830  | -2.482204 |
| H                             | -2.112972 | 3.014095  | -0.634536 | C                     | -1.173913 | 2.811882  | 1.241730  |
| C                             | -3.841495 | -0.191896 | 0.264813  | H                     | -0.557357 | 2.523898  | 2.096098  |
| C                             | -4.681917 | -0.505297 | 1.337865  | H                     | -2.116384 | 2.260514  | 1.240474  |
| C                             | -4.387477 | 0.291391  | -0.924533 | H                     | -1.337996 | 3.893545  | 1.245717  |
| C                             | -6.059708 | -0.333111 | 1.228060  | C                     | 0.252355  | -3.072147 | 0.868296  |
| H                             | -4.230627 | -0.886365 | 2.248561  | H                     | -0.590285 | -2.805348 | 1.508602  |
| C                             | -5.773434 | 0.468440  | -1.032847 | H                     | 1.197170  | -2.728088 | 1.297630  |
| C                             | -6.612409 | 0.155111  | 0.048305  | H                     | 0.275043  | -4.147050 | 0.666162  |
| H                             | -6.707642 | -0.580402 | 2.064337  | C                     | 1.414694  | -2.774692 | -1.624176 |
| H                             | -7.684937 | 0.294606  | -0.047514 | H                     | 1.350150  | -3.863503 | -1.705088 |
| H                             | -3.737037 | 0.518676  | -1.762065 | H                     | 2.330110  | -2.458339 | -1.120500 |
| C                             | -6.334378 | 0.977677  | -2.248370 | H                     | 1.355237  | -2.323034 | -2.616624 |
| N                             | -6.789991 | 1.400136  | -3.232157 | H                     | 4.592752  | 0.899488  | -2.342083 |
|                               |           |           |           | H                     | 5.805635  | 0.407355  | -0.225370 |
|                               |           |           |           | H                     | 2.055389  | -0.338820 | 1.738388  |
|                               |           |           |           | C                     | 4.675523  | -0.288292 | 2.102187  |
|                               |           |           |           | N                     | 5.219753  | -0.534061 | 3.101029  |
|                               |           |           |           |                       |           |           |           |
| <b>TS4<sub>m-CN</sub></b>     |           |           |           | <b>TS5</b>            |           |           |           |
| E = -1719.295146 a.u.         |           |           |           | E = -1627.098219 a.u. |           |           |           |
| Pd                            | 0.392740  | -0.772700 | -0.343773 | Pd                    | -0.337241 | 0.399982  | 0.849277  |
| S                             | -2.440423 | -1.797028 | 0.615614  | S                     | -1.951012 | -2.043487 | 0.213575  |
| F                             | -1.111593 | 3.429093  | -1.519302 | F                     | -3.312755 | 3.372948  | -1.180210 |
| F                             | -1.821542 | 3.743617  | 0.504184  | F                     | -3.190171 | 4.063786  | 0.877992  |
| F                             | -3.063954 | 2.683034  | -0.930493 | F                     | -4.873030 | 2.854250  | 0.234480  |
| O                             | -0.278751 | 1.071208  | -0.797133 | O                     | -1.502872 | 1.929499  | 0.344356  |
| O                             | -1.533677 | -1.613887 | -0.637256 | O                     | -1.190050 | -0.850155 | -0.492744 |
| O                             | 1.398864  | -2.522939 | 0.002328  | O                     | 0.842878  | -1.011289 | 1.590181  |
| O                             | -1.730709 | 0.996501  | 0.940878  | O                     | -3.371386 | 0.757578  | 0.859059  |
| O                             | 3.666922  | -2.391894 | -0.393737 | O                     | 1.783537  | -2.530566 | 0.229122  |
| C                             | -1.218689 | 1.514789  | -0.048066 | C                     | -2.776069 | 1.756469  | 0.481084  |
| C                             | -1.793482 | 2.873283  | -0.513573 | C                     | -3.557583 | 3.035527  | 0.096211  |
| C                             | -3.984208 | -0.964085 | 0.186377  | C                     | -3.530786 | -2.040274 | -0.651191 |
| C                             | -3.000018 | -3.508673 | 0.431928  | C                     | -1.154089 | -3.486089 | -0.507698 |
| C                             | 2.544178  | -2.076345 | -0.188639 | C                     | 1.849283  | -1.484484 | 0.864851  |
| H                             | -4.733452 | -1.198295 | 0.948946  | H                     | -4.096668 | -2.925538 | -0.344800 |
| H                             | -3.766038 | 0.104824  | 0.193289  | H                     | -4.041929 | -1.128261 | -0.334657 |
| H                             | -4.310509 | -1.294318 | -0.803721 | H                     | -3.357002 | -2.038281 | -1.730548 |
| H                             | -3.751626 | -3.728286 | 1.196582  | H                     | -1.632909 | -4.385208 | -0.106903 |
| H                             | -3.405648 | -3.660465 | -0.572232 | H                     | -1.231947 | -3.447648 | -1.597633 |
| H                             | -2.125954 | -4.147520 | 0.579218  | H                     | -0.103683 | -3.422809 | -0.193560 |
| C                             | 2.324614  | -0.140698 | -0.046811 | C                     | 3.116154  | -0.683684 | 0.897653  |
| C                             | 2.957998  | 0.570750  | -1.091191 | C                     | 4.164344  | -1.036677 | 0.038749  |
| C                             | 2.610949  | 0.210545  | 1.287075  | C                     | 3.274705  | 0.403142  | 1.766888  |
| C                             | 3.847214  | 1.598801  | -0.810140 | C                     | 5.344009  | -0.300313 | 0.033902  |
| H                             | 2.743353  | 0.308087  | -2.123546 | H                     | 4.029148  | -1.889882 | -0.618826 |
| C                             | 3.516040  | 1.241916  | 1.568690  | C                     | 4.459413  | 1.136633  | 1.765675  |
| C                             | 4.131533  | 1.934216  | 0.513937  | C                     | 5.492655  | 0.788579  | 0.896217  |
| H                             | 4.324210  | 2.147228  | -1.617257 | H                     | 6.151110  | -0.573183 | -0.641214 |
| H                             | 4.831879  | 2.732774  | 0.739928  | H                     | 4.578534  | 1.975403  | 2.446645  |
| H                             | 2.138581  | -0.321653 | 2.108181  | H                     | 6.416435  | 1.361793  | 0.893136  |
| C                             | 3.813492  | 1.588771  | 2.925941  | H                     | 2.475692  | 0.649473  | 2.460226  |
| N                             | 4.057606  | 1.867062  | 4.028526  |                       |           |           |           |
|                               |           |           |           | <b>TS6</b>            |           |           |           |
| <b>trans-7<sub>m-CN</sub></b> |           |           |           | E = -1627.089573 a.u. |           |           |           |
| E = -2083.934729 a.u.         |           |           |           | Pd                    | -0.463093 | -1.124493 | 0.819947  |
| Pd                            | -0.095178 | 0.088472  | -0.383118 |                       |           |           |           |
| S                             | -0.242026 | 2.408407  | -0.252955 |                       |           |           |           |
| S                             | -0.037599 | -2.225043 | -0.697791 |                       |           |           |           |
| O                             | -2.209665 | 0.173519  | -0.345927 |                       |           |           |           |

|   |           |           |           |
|---|-----------|-----------|-----------|
| S | -3.327652 | -0.209885 | 1.709015  |
| F | -0.352435 | 3.498674  | 2.471629  |
| F | 1.653456  | 2.752928  | 2.099808  |
| F | 0.791656  | 2.589818  | 4.081431  |
| O | 0.396524  | 0.587501  | 1.412700  |
| O | 1.025722  | -2.365535 | 0.899977  |
| O | -2.285404 | -0.209550 | 0.535870  |
| O | -1.085811 | 0.804133  | 3.117735  |
| O | 1.788901  | -3.307561 | -0.973498 |
| C | -4.815222 | -0.786684 | 0.856812  |
| C | -3.779517 | 1.526446  | 1.901111  |
| C | -0.133770 | 1.159313  | 2.432650  |
| C | 0.526526  | 2.519804  | 2.772243  |
| C | 1.893824  | -2.441631 | -0.122302 |
| H | -5.670013 | -0.707592 | 1.535542  |
| H | -4.977288 | -0.196036 | -0.048975 |
| H | -4.651444 | -1.834583 | 0.594267  |
| H | -4.644726 | 1.588341  | 2.568341  |
| H | -2.920587 | 2.019353  | 2.357995  |
| H | -4.005331 | 1.951571  | 0.919381  |
| C | 3.024788  | -1.465343 | -0.114488 |
| C | 3.341910  | -0.706956 | 1.017412  |
| C | 3.807928  | -1.348625 | -1.269759 |
| C | 4.427369  | 0.165542  | 0.990273  |
| H | 2.739439  | -0.812980 | 1.912861  |
| C | 4.885229  | -0.470086 | -1.297702 |
| C | 5.196062  | 0.288312  | -0.166676 |
| H | 4.671945  | 0.751841  | 1.872136  |
| H | 5.487189  | -0.377344 | -2.198167 |
| H | 6.040450  | 0.973135  | -0.187494 |
| H | 3.556238  | -1.960649 | -2.130741 |

**8**  
 E = -1627.118934 a.u.

|    |           |           |           |
|----|-----------|-----------|-----------|
| Pd | 0.504225  | -0.584467 | -0.060692 |
| S  | -0.027835 | 2.525054  | -0.379019 |
| F  | -4.254474 | 0.699265  | 0.350049  |
| F  | -4.025320 | -1.451637 | 0.545494  |
| F  | -4.417495 | -0.581090 | -1.399897 |
| O  | -1.492510 | -0.886488 | 0.251022  |
| O  | 0.748113  | -2.514064 | -0.476910 |
| O  | 0.333734  | 1.371591  | 0.613170  |
| O  | -1.942222 | 0.647884  | -1.350745 |
| O  | 2.597547  | -3.737960 | -0.011573 |
| C  | 1.072493  | 3.841914  | 0.199160  |
| C  | -1.575955 | 3.216184  | 0.245775  |
| C  | -2.251012 | -0.192295 | -0.504908 |
| C  | -3.760842 | -0.412631 | -0.246592 |
| C  | 2.012820  | -2.688185 | -0.159779 |
| H  | 0.837582  | 4.767872  | -0.334814 |
| H  | 0.956737  | 3.972465  | 1.278629  |
| H  | 2.093428  | 3.529797  | -0.027875 |
| H  | -1.756821 | 4.167450  | -0.264578 |
| H  | -2.365928 | 2.507914  | -0.002601 |
| H  | -1.495972 | 3.357961  | 1.327122  |
| C  | 2.661977  | -1.326917 | 0.020053  |
| C  | 3.418518  | -1.011640 | 1.175204  |
| C  | 2.594347  | -0.394881 | -1.051181 |
| C  | 4.080648  | 0.195322  | 1.255541  |
| H  | 3.483480  | -1.746983 | 1.971686  |
| C  | 3.307657  | 0.823965  | -0.955618 |
| C  | 4.029927  | 1.113875  | 0.185035  |
| H  | 4.665893  | 0.434591  | 2.139389  |
| H  | 3.311780  | 1.504819  | -1.803164 |
| H  | 4.592850  | 2.041677  | 0.252443  |
| H  | 2.190824  | -0.703721 | -2.013827 |

**TS7**  
 E = -1627.093483 a.u.

|    |           |           |           |
|----|-----------|-----------|-----------|
| Pd | 0.245555  | -0.751982 | 0.185698  |
| S  | -0.109529 | 2.310022  | -0.149435 |
| F  | -4.553397 | 0.602507  | 0.295343  |
| F  | -4.366634 | -1.558848 | 0.392560  |
| F  | -4.602825 | -0.581688 | -1.527434 |
| O  | -1.799800 | -1.072861 | 0.251591  |

|   |           |           |           |
|---|-----------|-----------|-----------|
| O | 0.769362  | -2.644601 | -0.365246 |
| O | -0.003410 | 1.161392  | 0.909404  |
| O | -2.130327 | 0.640357  | -1.191339 |
| O | 2.990699  | -3.175891 | -0.036658 |
| C | 1.103375  | 3.493714  | 0.488320  |
| C | -1.612686 | 3.193988  | 0.315652  |
| C | -2.499818 | -0.279908 | -0.455929 |
| C | -4.027681 | -0.481774 | -0.320331 |
| C | 1.987226  | -2.559050 | -0.148232 |
| H | 1.050925  | 4.415884  | -0.099070 |
| H | 0.909645  | 3.692373  | 1.546073  |
| H | 2.087523  | 3.034466  | 0.369626  |
| H | -1.654414 | 4.131117  | -0.248246 |
| H | -2.444521 | 2.548247  | 0.031264  |
| H | -1.602356 | 3.380867  | 1.393002  |
| C | 2.297049  | -0.608057 | 0.031706  |
| C | 3.044972  | -0.293168 | 1.187470  |
| C | 2.756191  | -0.143087 | -1.220277 |
| C | 4.205553  | 0.464214  | 1.093624  |
| H | 2.708933  | -0.651771 | 2.157322  |
| C | 3.922377  | 0.614073  | -1.313589 |
| C | 4.644654  | 0.914706  | -0.157048 |
| H | 4.776393  | 0.702575  | 1.987579  |
| H | 4.272420  | 0.962030  | -2.282137 |
| H | 5.560386  | 1.496771  | -0.228651 |
| H | 2.196280  | -0.385656 | -2.121283 |

**9**  
 E = -1627.114227 a.u.

|    |           |           |           |
|----|-----------|-----------|-----------|
| Pd | 0.347261  | -0.495236 | 0.022540  |
| S  | -0.280763 | 2.507248  | -0.118720 |
| F  | -4.594515 | 0.262799  | 0.517307  |
| F  | -4.192329 | -1.858751 | 0.291123  |
| F  | -4.646836 | -0.655066 | -1.452759 |
| O  | -1.690148 | -1.095430 | 0.074714  |
| O  | 0.829667  | -2.525379 | -0.750208 |
| O  | -0.041149 | 1.330506  | 0.890436  |
| O  | -2.289958 | 0.766073  | -1.064006 |
| O  | 2.637253  | -3.897644 | -0.196650 |
| C  | 0.908017  | 3.737885  | 0.474635  |
| C  | -1.796408 | 3.275387  | 0.485786  |
| C  | -2.512849 | -0.288217 | -0.455977 |
| C  | -4.003686 | -0.661061 | -0.273944 |
| C  | 1.752643  | -3.196111 | -0.459848 |
| H  | 0.770656  | 4.668980  | -0.084423 |
| H  | 0.773282  | 3.902235  | 1.547285  |
| H  | 1.904182  | 3.332238  | 0.282888  |
| H  | -1.936445 | 4.227593  | -0.035302 |
| H  | -2.600329 | 2.582704  | 0.231220  |
| H  | -1.719775 | 3.423339  | 1.566517  |
| C  | 2.263456  | -0.036890 | -0.016220 |
| C  | 2.954855  | 0.292611  | 1.156627  |
| C  | 2.958538  | -0.065596 | -1.233253 |
| C  | 4.324571  | 0.564852  | 1.114366  |
| H  | 2.424063  | 0.340449  | 2.105000  |
| C  | 4.328344  | 0.214724  | -1.272011 |
| C  | 5.013380  | 0.526532  | -0.098718 |
| H  | 4.853335  | 0.809435  | 2.033320  |
| H  | 4.856223  | 0.189365  | -2.223003 |
| H  | 6.078734  | 0.740954  | -0.129059 |
| H  | 2.436037  | -0.297576 | -2.160696 |

**TS8**  
 E = -2180.226482 a.u.

|    |           |           |           |
|----|-----------|-----------|-----------|
| Pd | 0.417694  | -0.428983 | 0.317583  |
| S  | 0.067367  | -2.323012 | -0.831915 |
| S  | 0.331555  | 2.964762  | -0.666158 |
| F  | 4.895763  | 0.368906  | 0.954554  |
| F  | 4.211151  | 0.157470  | 3.005202  |
| F  | 4.037580  | 2.072202  | 1.992263  |
| O  | 2.457453  | -0.662729 | 0.573101  |
| O  | 0.999127  | 1.679817  | -1.142151 |
| O  | -1.494564 | 0.085360  | 0.291803  |
| O  | -1.111531 | -2.495894 | -1.721806 |
| O  | 1.560549  | 1.001364  | 1.725553  |



|   |           |           |           |
|---|-----------|-----------|-----------|
| O | -2.029879 | -1.845051 | 1.315680  |
| C | 1.563670  | -2.529655 | -1.824602 |
| C | 0.194779  | -3.729166 | 0.289442  |
| C | 2.551110  | 0.350610  | 1.344111  |
| C | 3.955443  | 0.745150  | 1.825920  |
| C | 1.674027  | 4.103749  | -0.220986 |
| C | -0.214685 | 3.825354  | -2.170822 |
| C | -2.336832 | -0.744399 | 0.855890  |
| H | 2.444913  | -2.420371 | -1.188466 |
| H | 1.520148  | -3.513238 | -2.301097 |
| H | 1.547833  | -1.740817 | -2.580139 |
| H | 1.120309  | -3.639479 | 0.864673  |
| H | -0.676399 | -3.656596 | 0.942145  |
| H | 0.177519  | -4.643017 | -0.312148 |
| H | 1.253844  | 5.077435  | 0.050781  |
| H | 2.178560  | 3.664683  | 0.642432  |
| H | 2.376142  | 4.198633  | -1.055226 |
| H | -0.624039 | 4.806291  | -1.908759 |
| H | 0.623854  | 3.923723  | -2.867014 |
| H | -0.995367 | 3.207174  | -2.620920 |
| C | -3.748037 | -0.242518 | 0.905816  |
| C | -4.718779 | -1.051869 | 1.505205  |
| C | -4.113806 | 0.998727  | 0.373956  |
| C | -6.041643 | -0.625062 | 1.572751  |
| H | -4.413242 | -2.011861 | 1.909297  |
| C | -5.438209 | 1.423454  | 0.441701  |
| C | -6.403347 | 0.613283  | 1.040904  |
| H | -6.792285 | -1.258245 | 2.039136  |
| H | -5.719675 | 2.388174  | 0.026604  |
| H | -7.437055 | 0.946781  | 1.092834  |
| H | -3.354562 | 1.619347  | -0.090329 |

#### INT'

|                       |           |           |           |
|-----------------------|-----------|-----------|-----------|
| E = -1627.136511 a.u. |           |           |           |
| Pd                    | -0.613065 | 0.166878  | -0.179012 |
| S                     | -0.028229 | 2.338371  | -0.264480 |
| F                     | -4.720206 | -1.618163 | -1.028165 |
| F                     | -4.965457 | -0.813712 | 0.976198  |
| F                     | -4.114699 | -2.792806 | 0.697430  |
| O                     | -2.675576 | 0.330870  | 0.095414  |
| O                     | 1.232924  | -0.455620 | -0.501698 |
| O                     | 1.188061  | 2.800862  | -0.979580 |
| O                     | -1.766336 | -1.671008 | -0.033832 |
| O                     | 1.910205  | 0.674975  | 1.317652  |
| C                     | -1.463982 | 3.162199  | -0.992543 |
| C                     | -0.061948 | 3.001093  | 1.411322  |
| C                     | -2.776551 | -0.939944 | 0.093927  |
| C                     | -4.176624 | -1.560315 | 0.197458  |
| C                     | 2.133469  | -0.093040 | 0.380055  |
| H                     | -2.373943 | 2.850259  | -0.474266 |
| H                     | -1.304425 | 4.241802  | -0.919982 |
| H                     | -1.504262 | 2.860111  | -2.041587 |
| H                     | -1.015204 | 2.739132  | 1.878919  |
| H                     | 0.770448  | 2.522638  | 1.929040  |
| H                     | 0.069200  | 4.085116  | 1.343316  |
| C                     | 3.481452  | -0.700878 | 0.157747  |
| C                     | 4.515585  | -0.361746 | 1.036850  |
| C                     | 3.725551  | -1.593010 | -0.892617 |
| C                     | 5.783483  | -0.908935 | 0.866794  |
| H                     | 4.303703  | 0.331765  | 1.844513  |
| C                     | 4.995282  | -2.139205 | -1.059259 |
| C                     | 6.024752  | -1.798425 | -0.181241 |
| H                     | 6.584869  | -0.642586 | 1.551284  |
| H                     | 5.182498  | -2.832371 | -1.875388 |
| H                     | 7.015503  | -2.226430 | -0.313555 |
| H                     | 2.917772  | -1.851427 | -1.569430 |

#### TS3'

|                       |           |           |           |
|-----------------------|-----------|-----------|-----------|
| E = -1627.118586 a.u. |           |           |           |
| Pd                    | -0.728743 | -0.382510 | -0.035724 |
| S                     | -1.203649 | -2.589903 | -0.071464 |
| F                     | 3.416566  | 0.866606  | -1.655574 |
| F                     | 3.910635  | -0.383735 | 0.053285  |
| F                     | 3.636112  | 1.754199  | 0.314003  |
| O                     | 1.233827  | -0.659076 | -0.553235 |

|   |           |           |           |
|---|-----------|-----------|-----------|
| O | -2.597939 | -0.095424 | 0.586301  |
| O | -1.765884 | -3.168847 | -1.324600 |
| O | 1.006695  | 1.285672  | 0.492970  |
| O | -3.987557 | 1.604861  | 0.981617  |
| C | 0.287606  | -3.500764 | 0.370856  |
| C | -2.300501 | -2.967804 | 1.304477  |
| C | 1.698738  | 0.448107  | -0.092782 |
| C | 3.197654  | 0.682256  | -0.343880 |
| C | -3.010043 | 1.155615  | 0.419586  |
| H | 0.640515  | -3.166162 | 1.349648  |
| H | 0.042779  | -4.566820 | 0.369018  |
| H | 1.036400  | -3.271649 | -0.390001 |
| H | -1.805160 | -2.708389 | 2.243658  |
| H | -3.187983 | -2.345011 | 1.174842  |
| H | -2.543711 | -4.032663 | 1.250343  |
| C | -2.146419 | 1.968622  | -0.502086 |
| C | -1.710193 | 1.444698  | -1.735764 |
| C | -1.785590 | 3.271895  | -0.137506 |
| C | -0.899814 | 2.217270  | -2.574953 |
| H | -2.085171 | 0.483470  | -2.085579 |
| C | -0.970690 | 4.026423  | -0.971613 |
| C | -0.521251 | 3.498282  | -2.186763 |
| H | -0.583997 | 1.817773  | -3.534912 |
| H | -0.680112 | 5.031512  | -0.677996 |
| H | 0.113099  | 4.096711  | -2.835321 |
| H | -2.149372 | 3.672211  | 0.804027  |

#### 5'

|                       |           |           |           |
|-----------------------|-----------|-----------|-----------|
| E = -1627.127487 a.u. |           |           |           |
| Pd                    | -0.774130 | -0.176772 | -0.334903 |
| S                     | -0.880565 | -2.471378 | -0.179449 |
| F                     | 3.562130  | 1.373997  | -0.090963 |
| F                     | 3.914957  | -0.616449 | -0.893306 |
| F                     | 4.188079  | -0.233723 | 1.223986  |
| O                     | 1.229903  | -0.066540 | -0.633214 |
| O                     | -2.749378 | -0.109142 | 0.016338  |
| O                     | -1.787349 | -3.155652 | -1.144566 |
| O                     | 1.596585  | -0.756251 | 1.491705  |
| O                     | -3.891418 | 1.584407  | 0.981886  |
| C                     | 0.725093  | -3.288475 | -0.227536 |
| C                     | -1.410616 | -2.813848 | 1.507733  |
| C                     | 1.948406  | -0.300015 | 0.410631  |
| C                     | 3.433700  | 0.060045  | 0.164099  |
| C                     | -2.914967 | 1.135516  | 0.425510  |
| H                     | 1.344579  | -2.913233 | 0.589035  |
| H                     | 0.534440  | -4.362083 | -0.143139 |
| H                     | 1.175914  | -3.059437 | -1.195396 |
| H                     | -0.685576 | -2.369790 | 2.195401  |
| H                     | -2.390291 | -2.343345 | 1.620103  |
| H                     | -1.485715 | -3.898096 | 1.632977  |
| C                     | -1.666282 | 1.944775  | 0.131307  |
| C                     | -1.158743 | 1.987799  | -1.196112 |
| C                     | -1.028736 | 2.695153  | 1.143430  |
| C                     | -0.027433 | 2.776399  | -1.485413 |
| H                     | -1.734107 | 1.549608  | -2.010390 |
| C                     | 0.089390  | 3.449302  | 0.838644  |
| C                     | 0.593873  | 3.487609  | -0.475120 |
| H                     | 0.344631  | 2.823219  | -2.504394 |
| H                     | 0.582803  | 4.022193  | 1.619121  |
| H                     | 1.471569  | 4.088388  | -0.695091 |
| H                     | -1.440675 | 2.675668  | 2.147931  |

#### TS4'

|                       |           |           |           |
|-----------------------|-----------|-----------|-----------|
| E = -1627.095998 a.u. |           |           |           |
| Pd                    | -0.291523 | -0.778105 | -0.120190 |
| S                     | 1.613905  | -2.192378 | -0.244920 |
| F                     | 2.818571  | 3.196684  | 1.133270  |
| F                     | 1.325777  | 3.546766  | -0.397851 |
| F                     | 3.155322  | 2.476975  | -0.887514 |
| O                     | 0.721662  | 0.939304  | -0.486490 |
| O                     | -1.648064 | -2.282983 | 0.231678  |
| O                     | 1.413282  | -3.477834 | -0.988159 |
| O                     | 1.936279  | 0.694141  | 1.409439  |
| O                     | -3.814832 | -1.667692 | 0.740983  |
| C                     | 3.087270  | -1.378466 | -0.900177 |

|                       |           |           |           |                           |           |           |           |
|-----------------------|-----------|-----------|-----------|---------------------------|-----------|-----------|-----------|
| C                     | 2.179206  | -2.556432 | 1.431060  | H                         | -1.677921 | -2.652691 | -1.631636 |
| C                     | 1.568105  | 1.301462  | 0.409648  | H                         | -1.992292 | -3.969856 | -0.451582 |
| C                     | 2.218661  | 2.663599  | 0.066546  | C                         | 0.827739  | 1.737407  | 0.182608  |
| C                     | -2.679760 | -1.628809 | 0.425108  | C                         | 1.414984  | 2.280212  | 1.329129  |
| H                     | 3.363569  | -0.547862 | -0.248611 | C                         | 0.439921  | 2.571481  | -0.868818 |
| H                     | 3.877348  | -2.133337 | -0.947856 | C                         | 1.623447  | 3.660300  | 1.416499  |
| H                     | 2.846509  | -1.019954 | -1.903008 | H                         | 1.714602  | 1.639493  | 2.156000  |
| H                     | 2.350100  | -1.606727 | 1.944027  | C                         | 0.655640  | 3.949721  | -0.773402 |
| H                     | 1.381122  | -3.122495 | 1.917536  | C                         | 1.249359  | 4.495229  | 0.364197  |
| H                     | 3.084867  | -3.166800 | 1.367434  | H                         | 2.078201  | 4.078071  | 2.312006  |
| C                     | -2.064224 | 0.256910  | -0.017746 | H                         | 0.348108  | 4.596602  | -1.592156 |
| C                     | -2.670132 | 0.579286  | -1.251430 | H                         | 1.412377  | 5.567754  | 0.434331  |
| C                     | -2.291288 | 1.091460  | 1.098615  | H                         | -0.051377 | 2.156569  | -1.744619 |
| C                     | -3.498255 | 1.691665  | -1.358185 | S                         | 2.716071  | -0.588407 | -0.215469 |
| H                     | -2.498063 | -0.051827 | -2.120556 | C                         | 2.944492  | -1.837835 | -1.497514 |
| C                     | -3.118326 | 2.201228  | 0.986382  | H                         | 2.430281  | -2.743583 | -1.158765 |
| C                     | -3.721740 | 2.497395  | -0.240084 | H                         | 2.505356  | -1.476593 | -2.432378 |
| H                     | -3.968233 | 1.933403  | -2.307711 | H                         | 4.019031  | -2.013625 | -1.603972 |
| H                     | -3.294433 | 2.840159  | 1.847667  | C                         | 3.592494  | 0.787946  | -0.988580 |
| H                     | -4.370309 | 3.365840  | -0.323784 | H                         | 3.581050  | 1.620114  | -0.283352 |
| H                     | -1.822155 | 0.859215  | 2.051812  | H                         | 4.616478  | 0.453878  | -1.179373 |
|                       |           |           |           | H                         | 3.080931  | 1.077324  | -1.909899 |
|                       |           |           |           | O                         | 3.481171  | -1.002158 | 1.003632  |
| <b>6'</b>             |           |           |           |                           |           |           |           |
| E = -1627.113643 a.u. |           |           |           |                           |           |           |           |
| Pd                    | 0.400791  | 0.611943  | -0.109482 | <b>10<sub>o-OMe</sub></b> |           |           |           |
| S                     | -1.263288 | 2.414987  | -0.059046 | E = -1862.647428 a.u.     |           |           |           |
| F                     | -3.257150 | -2.936276 | 0.893363  | C                         | 3.875728  | -0.794524 | -0.246818 |
| F                     | -2.395860 | -3.010333 | -1.093190 | C                         | 2.773439  | -1.552381 | 0.178234  |
| F                     | -3.811421 | -1.439488 | -0.580123 | C                         | 2.849262  | -2.203799 | 1.418757  |
| O                     | -1.017713 | -0.750061 | -0.638757 | C                         | 3.986117  | -2.102879 | 2.214853  |
| O                     | 2.062913  | 2.033929  | 0.365337  | C                         | 5.073065  | -1.345115 | 1.780860  |
| O                     | -0.826738 | 3.840819  | -0.248370 | C                         | 5.011732  | -0.692148 | 0.548428  |
| O                     | -1.528121 | -1.007520 | 1.555341  | C                         | 1.561913  | -1.747759 | -0.637420 |
| O                     | 4.350635  | 1.698907  | 0.694147  | Cd                        | 1.326663  | -1.301660 | -1.936342 |
| C                     | -2.575458 | 2.052682  | -1.250568 | Pd                        | 0.049930  | -0.128250 | -0.693712 |
| C                     | -2.215907 | 2.297054  | 1.474471  | O                         | -1.450698 | -1.755016 | -0.981918 |
| C                     | -1.657766 | -1.247161 | 0.363043  | S                         | -2.259257 | -2.435523 | 0.148375  |
| C                     | -2.787582 | -2.193954 | -0.109201 | C                         | -3.982343 | -1.943582 | -0.104370 |
| C                     | 3.212917  | 1.835891  | 0.525518  | C                         | 1.356575  | 1.351907  | -0.629136 |
| H                     | -2.944211 | 1.035672  | -1.101280 | C                         | 1.756246  | 2.024719  | -1.777793 |
| H                     | -3.368157 | 2.795956  | -1.126706 | C                         | 2.629038  | 3.118942  | -1.701848 |
| H                     | -2.131774 | 2.141371  | -2.245054 | C                         | 3.090274  | 3.537357  | -0.460312 |
| H                     | -2.513021 | 1.257120  | 1.634205  | C                         | 2.683653  | 2.881863  | 0.704823  |
| H                     | -1.549359 | 2.612805  | 2.280777  | C                         | 1.811725  | 1.792206  | 0.625720  |
| H                     | -3.074192 | 2.972296  | 1.412971  | O                         | -1.367933 | 1.342337  | -0.272325 |
| C                     | 1.733170  | -0.849375 | -0.135012 | C                         | -2.176341 | 1.082322  | 0.675220  |
| C                     | 2.496111  | -1.066653 | -1.285348 | O                         | -2.242758 | 0.087508  | 1.400277  |
| C                     | 1.950896  | -1.612930 | 1.014814  | C                         | -3.268452 | 2.161153  | 0.874800  |
| C                     | 3.504109  | -2.035695 | -1.272111 | F                         | -4.426288 | 1.706367  | 0.332364  |
| H                     | 2.304850  | -0.500067 | -2.194747 | F                         | -2.984228 | 3.331126  | 0.296432  |
| C                     | 2.962127  | -2.578209 | 1.016934  | F                         | -3.496127 | 2.385309  | 2.176426  |
| C                     | 3.738679  | -2.788105 | -0.122161 | C                         | -2.423032 | -4.134770 | -0.471301 |
| H                     | 4.098314  | -2.204239 | -2.167340 | H                         | 2.052819  | -0.686434 | -2.460038 |
| H                     | 3.132917  | -3.172387 | 1.911744  | H                         | 3.045724  | 3.229771  | 1.667228  |
| H                     | 4.519758  | -3.544010 | -0.116816 | H                         | 1.376899  | 1.711571  | -2.748284 |
| H                     | 1.328789  | -1.472646 | 1.895340  | H                         | 0.596986  | -1.817101 | -2.556581 |
|                       |           |           |           | H                         | 0.914005  | -2.544270 | -0.272141 |
|                       |           |           |           | H                         | 3.766214  | 4.385522  | -0.383322 |
|                       |           |           |           | H                         | 2.930656  | 3.636873  | -2.608776 |
|                       |           |           |           | H                         | -1.426401 | -4.582860 | -0.460992 |
|                       |           |           |           | H                         | -3.085643 | -4.702421 | 0.189662  |
|                       |           |           |           | H                         | -2.810833 | -4.121838 | -1.494049 |
|                       |           |           |           | H                         | -4.617183 | -2.552160 | 0.547420  |
|                       |           |           |           | H                         | -4.059866 | -0.895781 | 0.184094  |
|                       |           |           |           | H                         | -4.248596 | -2.083259 | -1.156096 |
|                       |           |           |           | H                         | 2.000711  | -2.792744 | 1.761037  |
|                       |           |           |           | H                         | 4.023874  | -2.616753 | 3.172013  |
|                       |           |           |           | H                         | 5.965046  | -1.265446 | 2.397126  |
|                       |           |           |           | H                         | 5.854475  | -0.098345 | 0.204391  |
|                       |           |           |           | H                         | 3.842384  | -0.272068 | -1.197713 |
|                       |           |           |           | O                         | 1.351903  | 1.100938  | 1.705746  |
|                       |           |           |           | C                         | 1.730489  | 1.540700  | 2.991812  |
|                       |           |           |           | H                         | 1.407082  | 2.574289  | 3.175137  |
|                       |           |           |           | H                         | 1.224527  | 0.876531  | 3.694548  |
|                       |           |           |           | H                         | 2.816220  | 1.467141  | 3.140487  |

**cis-7'**

E = -1991.731355 a.u.

|    |           |           |           |
|----|-----------|-----------|-----------|
| Pd | 0.476172  | -0.231459 | 0.087852  |
| S  | -0.177122 | -2.600396 | 0.212929  |
| F  | -4.452889 | 1.067393  | -1.106698 |
| F  | -3.779038 | 1.617650  | 0.878101  |
| F  | -4.244627 | -0.458717 | 0.425292  |
| O  | -1.503754 | 0.150026  | 0.531575  |
| O  | 0.751112  | -3.714448 | -0.203353 |
| O  | -1.936866 | 0.385904  | -1.680243 |
| C  | -0.642697 | -2.850420 | 1.940731  |
| C  | -1.776865 | -2.904366 | -0.573981 |
| C  | -2.239086 | 0.401407  | -0.495553 |
| C  | -3.702084 | 0.680394  | -0.075141 |
| H  | -1.338257 | -2.058456 | 2.232016  |
| H  | -1.090131 | -3.842856 | 2.047909  |
| H  | 0.275948  | -2.785927 | 2.528828  |
| H  | -2.548132 | -2.286201 | -0.111898 |

**TS8<sub>o-OMe</sub>**

E = -1862.628367 a.u.

|    |           |           |           |
|----|-----------|-----------|-----------|
| C  | -3.069448 | -1.214494 | 1.365438  |
| C  | -3.125776 | -0.847721 | 0.009605  |
| C  | -4.178295 | -0.020032 | -0.413727 |
| C  | -5.152198 | 0.415917  | 0.480364  |
| C  | -5.089503 | 0.038614  | 1.821339  |
| C  | -4.042469 | -0.775312 | 2.257437  |
| C  | -2.136626 | -1.303088 | -0.987878 |
| C  | -1.338143 | -2.482013 | -0.859615 |
| Pd | -0.272503 | -0.466298 | -0.591943 |
| O  | -1.070052 | 1.503744  | -0.972299 |
| S  | -0.264661 | 2.696381  | -0.390066 |
| C  | 0.814197  | 3.259292  | -1.727971 |
| C  | 0.630803  | -2.310947 | -0.436085 |
| C  | 1.462462  | -2.648377 | -1.511505 |
| C  | 2.615970  | -3.406407 | -1.322626 |
| C  | 2.933356  | -3.855875 | -0.042606 |
| C  | 2.100075  | -3.565930 | 1.036962  |
| C  | 0.940484  | -2.809212 | 0.846944  |
| O  | 1.555549  | 0.566140  | -0.277671 |
| C  | 2.165624  | 0.556028  | 0.852481  |
| O  | 1.878201  | 0.004012  | 1.903505  |
| C  | 3.429105  | 1.455788  | 0.809712  |
| F  | 4.215189  | 1.283547  | 1.874988  |
| F  | 3.057338  | 2.764073  | 0.787898  |
| F  | 4.171094  | 1.242842  | -0.291454 |
| C  | -1.490528 | 4.025751  | -0.459255 |
| H  | -2.359138 | -0.985598 | -2.008778 |
| H  | -1.127603 | -3.021397 | -1.777429 |
| H  | 2.360566  | -3.926749 | 2.026541  |
| H  | 1.209448  | -2.290611 | -2.507368 |
| H  | -1.504280 | -3.120087 | 0.004139  |
| H  | 3.831343  | -4.445380 | 0.123775  |
| H  | 3.260036  | -3.638622 | -2.166347 |
| H  | 1.276814  | 4.208193  | -1.440106 |
| H  | 1.578775  | 2.487920  | -1.834650 |
| H  | 0.230649  | 3.364414  | -2.647270 |
| H  | -1.017934 | 4.969657  | -0.170454 |
| H  | -1.911942 | 4.089238  | -1.466381 |
| H  | -2.276093 | 3.770179  | 0.255634  |
| H  | -4.230121 | 0.278203  | -1.458527 |
| H  | -5.963070 | 1.049096  | 0.128162  |
| H  | -5.849021 | 0.376358  | 2.521915  |
| H  | -3.982097 | -1.068131 | 3.302897  |
| H  | -2.245605 | -1.826765 | 1.720010  |
| O  | 0.049458  | -2.540240 | 1.834308  |
| C  | 0.486445  | -2.659735 | 3.178200  |
| H  | 0.649887  | -3.709093 | 3.458443  |
| H  | 1.395325  | -2.071452 | 3.334816  |
| H  | -0.319970 | -2.250570 | 3.789597  |

**11<sub>o-OMe</sub>**

E = -1862.647351 a.u.

|    |           |           |           |
|----|-----------|-----------|-----------|
| C  | 3.955125  | -0.985782 | 0.206256  |
| C  | 2.723421  | -1.659578 | 0.239129  |
| C  | 2.381896  | -2.380657 | 1.395941  |
| C  | 3.235782  | -2.415637 | 2.493790  |
| C  | 4.454321  | -1.737851 | 2.448717  |
| C  | 4.811669  | -1.027379 | 1.301246  |
| C  | 1.794396  | -1.690109 | -0.898489 |
| C  | 1.869422  | -0.980198 | -2.081950 |
| Pd | 0.255474  | 0.027495  | -0.953486 |
| C  | 1.518200  | 1.577868  | -0.838206 |
| C  | 1.579899  | 2.449670  | -1.942161 |
| C  | 2.366401  | 3.604029  | -1.885414 |
| C  | 3.104079  | 3.886082  | -0.732538 |
| C  | 3.065421  | 3.025505  | 0.357976  |
| C  | 2.269633  | 1.872366  | 0.295918  |
| O  | -1.251896 | -1.468666 | -0.966286 |
| C  | -1.435536 | -2.259856 | -1.961828 |
| O  | -0.731561 | -2.464636 | -2.940594 |
| C  | -2.781118 | -3.017753 | -1.827455 |
| F  | -3.812905 | -2.144530 | -1.908940 |

|   |           |           |           |
|---|-----------|-----------|-----------|
| F | -2.875976 | -3.639696 | -0.636663 |
| F | -2.947083 | -3.932013 | -2.783685 |
| H | 2.675244  | -0.279847 | -2.278413 |
| H | 3.643656  | 3.239929  | 1.253247  |
| H | 1.258269  | -1.306344 | -2.921183 |
| H | 1.055222  | -2.488350 | -0.856804 |
| H | 2.241963  | 1.198473  | 1.149809  |
| H | 3.711737  | 4.786980  | -0.698915 |
| H | 2.410078  | 4.285226  | -2.729347 |
| H | 1.435230  | -2.916057 | 1.425104  |
| H | 2.955401  | -2.978241 | 3.380372  |
| H | 5.127975  | -1.769985 | 3.301138  |
| H | 5.764226  | -0.505966 | 1.258410  |
| H | 4.246609  | -0.433772 | -0.681834 |
| S | -1.439461 | 1.520794  | -0.218775 |
| O | -1.807018 | 2.695729  | -1.069484 |
| C | -1.030568 | 2.127744  | 1.434027  |
| C | -2.947582 | 0.609617  | 0.176797  |
| H | -0.856803 | 1.279532  | 2.102528  |
| H | -0.121211 | 2.724055  | 1.337835  |
| H | -1.862372 | 2.746945  | 1.782645  |
| H | -3.315500 | 0.155346  | -0.743064 |
| H | -2.718917 | -0.181831 | 0.893654  |
| H | -3.665621 | 1.333153  | 0.573626  |
| O | 0.848178  | 2.076328  | -3.028782 |
| C | 0.686206  | 3.006011  | -4.081765 |
| H | -0.002777 | 2.539354  | -4.787438 |
| H | 0.253094  | 3.945411  | -3.716779 |
| H | 1.638228  | 3.211526  | -4.589984 |

**TS9<sub>o-OMe</sub>**

E = -1862.633367 a.u.

|    |           |           |           |
|----|-----------|-----------|-----------|
| Pd | 0.179726  | -0.262039 | -0.070074 |
| S  | 0.963060  | -1.934681 | 1.457153  |
| F  | -3.322055 | -1.325646 | 2.948804  |
| F  | -4.285387 | -1.645904 | 1.025810  |
| F  | -4.735734 | 0.132143  | 2.180973  |
| O  | -1.688533 | -0.807304 | 0.746786  |
| O  | 2.414245  | -2.282028 | 1.612150  |
| O  | -2.601675 | -1.252263 | 1.058506  |
| C  | 0.292540  | -1.572187 | 3.097937  |
| C  | 0.035070  | -3.444876 | 1.095707  |
| C  | -2.577767 | 0.031179  | 1.137224  |
| C  | -3.758346 | -0.702296 | 1.825603  |
| H  | -0.788410 | -1.442295 | 3.025806  |
| H  | 0.559783  | -2.400009 | 3.761404  |
| H  | 0.767536  | -0.649827 | 3.439311  |
| H  | -1.024098 | -3.186523 | 1.020899  |
| H  | 0.406528  | -3.823287 | 0.140477  |
| H  | 0.226417  | -4.174991 | 1.887633  |
| C  | 2.406750  | -0.820238 | -1.925346 |
| C  | 3.097416  | 0.523173  | -0.035171 |
| C  | 3.729518  | -1.187237 | -2.163628 |
| H  | 1.619378  | -1.197537 | -2.574241 |
| C  | 4.426182  | 0.174341  | -0.286129 |
| C  | 4.735241  | -0.680370 | -1.343874 |
| H  | 3.970757  | -1.857047 | -2.984432 |
| H  | 5.224001  | 0.546777  | 0.347552  |
| H  | 5.773087  | -0.949903 | -1.520853 |
| O  | 2.706555  | 1.340539  | 0.980398  |
| C  | 3.698150  | 1.841287  | 1.858566  |
| H  | 4.217730  | 1.025528  | 2.375842  |
| H  | 4.429907  | 2.463515  | 1.326832  |
| H  | 3.166816  | 2.455357  | 2.587580  |
| C  | 2.064830  | 0.026290  | -0.860745 |
| C  | -1.355346 | 0.780264  | -2.480215 |
| C  | 0.836856  | 1.559163  | -1.414611 |
| C  | -0.790442 | 0.303322  | -3.675842 |
| C  | -2.756791 | 0.803448  | -2.370299 |
| H  | 1.234109  | 2.281944  | -0.708080 |
| H  | 1.321942  | 1.567460  | -2.384778 |
| C  | -1.597762 | -0.142481 | -4.717471 |
| H  | 0.289048  | 0.824768  | -3.801306 |
| C  | -3.562438 | 0.360021  | -3.414036 |
| H  | -3.204302 | 1.173412  | -1.451635 |

|   |           |           |           |
|---|-----------|-----------|-----------|
| C | -2.987335 | -0.118176 | -4.591386 |
| H | -1.140384 | -0.505453 | -5.634624 |
| H | -4.643768 | 0.388078  | -3.307061 |
| H | -3.616094 | -0.465111 | -5.407257 |
| C | -0.555708 | 1.282869  | -1.347385 |
| H | -1.129172 | 1.791222  | -0.571056 |

**10<sub>o-NO2</sub>**

E = -1952.595528 a.u.

|    |           |           |           |
|----|-----------|-----------|-----------|
| C  | 3.911426  | -0.923470 | -0.563849 |
| C  | 2.805618  | -1.574558 | 0.004527  |
| C  | 2.949100  | -2.139595 | 1.281376  |
| C  | 4.150056  | -2.042761 | 1.977489  |
| C  | 5.238001  | -1.386329 | 1.403438  |
| C  | 5.113825  | -0.829845 | 0.129909  |
| C  | 1.517995  | -1.735215 | -0.699368 |
| C  | 1.153410  | -1.167978 | -1.924778 |
| Pd | -0.015110 | -0.164353 | -0.449789 |
| O  | -1.460440 | -1.779388 | -0.765212 |
| S  | -2.372684 | -2.320116 | 0.370636  |
| C  | -4.062449 | -2.062359 | -0.219183 |
| C  | 1.267373  | 1.304306  | -0.242441 |
| C  | 1.643064  | 2.121458  | -1.312591 |
| C  | 2.507335  | 3.199580  | -1.122892 |
| C  | 3.018047  | 3.488981  | 0.145087  |
| C  | 2.647584  | 2.703651  | 1.226525  |
| C  | 1.775358  | 1.632338  | 1.020525  |
| O  | -1.458868 | 1.382226  | -0.448760 |
| C  | -2.508829 | 1.235673  | 0.254696  |
| O  | -2.814649 | 0.333009  | 1.035042  |
| C  | -3.575020 | 2.334299  | 0.019921  |
| F  | -4.552453 | 1.818540  | -0.764290 |
| F  | -3.099773 | 3.425517  | -0.589429 |
| F  | -4.141209 | 2.716132  | 1.172442  |
| C  | -2.301378 | -4.111383 | 0.085352  |
| H  | 1.817850  | -0.484819 | -2.447607 |
| H  | 3.006424  | 2.901561  | 2.230442  |
| H  | 1.236853  | 1.929148  | -2.301696 |
| H  | 0.385674  | -1.641470 | -2.531768 |
| H  | 0.930170  | -2.588250 | -0.362853 |
| H  | 3.689849  | 4.329848  | 0.290243  |
| H  | 2.777371  | 3.823614  | -1.971625 |
| H  | -1.290448 | -4.442236 | 0.335559  |
| H  | -3.019561 | -4.611298 | 0.742965  |
| H  | -2.515177 | -4.332391 | -0.964320 |
| H  | -4.749691 | -2.583295 | 0.454837  |
| H  | -4.243701 | -0.988610 | -0.171661 |
| H  | -4.152030 | -2.438025 | -1.242466 |
| H  | 2.100111  | -2.644231 | 1.736456  |
| H  | 4.235172  | -2.478484 | 2.969340  |
| H  | 6.178398  | -1.311450 | 1.943098  |
| H  | 5.959895  | -0.324169 | -0.328346 |
| H  | 3.836751  | -0.494640 | -1.558915 |
| N  | 1.378576  | 0.856529  | 2.190413  |
| O  | 1.925760  | 1.086703  | 3.258575  |
| O  | 0.494089  | 0.003479  | 2.052039  |

**TS8<sub>o-NO2</sub>**

E = -1952.566547 a.u.

|    |           |           |           |
|----|-----------|-----------|-----------|
| C  | -3.334629 | -0.942618 | 1.348240  |
| C  | -3.177416 | -0.785768 | -0.039649 |
| C  | -4.119825 | -0.006471 | -0.732607 |
| C  | -5.188240 | 0.588305  | -0.068619 |
| C  | -5.334203 | 0.421848  | 1.308375  |
| C  | -4.401479 | -0.343578 | 2.010429  |
| C  | -2.086165 | -1.403941 | -0.818315 |
| C  | -1.323797 | -2.559185 | -0.413146 |
| Pd | -0.262437 | -0.507580 | -0.409282 |
| O  | -1.071007 | 1.423461  | -0.871718 |
| S  | -0.356732 | 2.641630  | -0.219104 |
| C  | 0.697370  | 3.335663  | -1.513617 |
| C  | 0.603271  | -2.377749 | -0.249029 |
| C  | 1.259334  | -2.743071 | -1.442801 |
| C  | 2.447773  | -3.462515 | -1.437480 |
| C  | 2.999877  | -3.894401 | -0.229118 |

|   |           |           |           |
|---|-----------|-----------|-----------|
| C | 2.362277  | -3.582856 | 0.963708  |
| C | 1.190274  | -2.829532 | 0.948561  |
| O | 1.531850  | 0.601558  | -0.182890 |
| C | 2.379688  | 0.509065  | 0.778453  |
| O | 2.433735  | -0.268189 | 1.716733  |
| C | 3.454132  | 1.624949  | 0.675639  |
| F | 4.486951  | 1.418784  | 1.492395  |
| F | 2.906483  | 2.824575  | 1.002937  |
| F | 3.935727  | 1.748234  | -0.578693 |
| C | -1.672795 | 3.882461  | -0.256267 |
| H | -2.219109 | -1.293854 | -1.897489 |
| H | -1.197689 | -3.316806 | -1.180586 |
| H | 2.766363  | -3.887137 | 1.921766  |
| H | 0.817259  | -2.450020 | -2.392289 |
| H | -1.529047 | -2.965892 | 0.572378  |
| H | 3.920847  | -4.469524 | -0.216314 |
| H | 2.937437  | -3.698756 | -2.378704 |
| H | 1.083797  | 4.303110  | -1.178773 |
| H | 1.518377  | 2.628966  | -1.641346 |
| H | 0.118578  | 3.437793  | -2.436171 |
| H | -1.275548 | 4.840807  | 0.092346  |
| H | -2.073021 | 3.968779  | -1.270270 |
| H | -2.454992 | 3.535003  | 0.422561  |
| H | -4.008011 | 0.128892  | -1.806017 |
| H | -5.909509 | 1.179205  | -0.627974 |
| H | -6.168966 | 0.882265  | 1.830793  |
| H | -4.503552 | -0.475962 | 3.084557  |
| H | -2.610034 | -1.515175 | 1.916935  |
| N | 0.601221  | -2.512057 | 2.249926  |
| O | -0.382474 | -1.774468 | 2.277590  |
| O | 1.097631  | -3.021229 | 3.243320  |

**11<sub>o-NO2</sub>**

E = -1952.600327 a.u.

|    |           |           |           |
|----|-----------|-----------|-----------|
| C  | 4.069262  | -0.974995 | -0.034071 |
| C  | 2.800183  | -1.495292 | 0.267180  |
| C  | 2.559143  | -1.964792 | 1.569716  |
| C  | 3.545300  | -1.894788 | 2.548211  |
| C  | 4.799365  | -1.367972 | 2.236161  |
| C  | 5.058870  | -0.914665 | 0.941904  |
| C  | 1.734836  | -1.622404 | -0.735508 |
| C  | 1.697159  | -1.077078 | -2.012494 |
| Pd | 0.221663  | 0.096539  | -0.910560 |
| C  | 1.486585  | 1.627406  | -0.930363 |
| C  | 1.462720  | 2.556497  | -1.981111 |
| C  | 2.306610  | 3.668943  | -2.035941 |
| C  | 3.198267  | 3.886046  | -0.996436 |
| C  | 3.232610  | 2.992121  | 0.076351  |
| C  | 2.392568  | 1.878234  | 0.104059  |
| O  | -1.339608 | -1.325118 | -0.772366 |
| O  | -1.564871 | -2.301545 | -1.580254 |
| O  | -0.870037 | -2.755090 | -2.474755 |
| C  | -2.952465 | -2.929132 | -1.291023 |
| F  | -3.930200 | -2.019740 | -1.513269 |
| F  | -3.047452 | -3.307502 | 0.000132  |
| F  | -3.200233 | -3.991561 | -2.053708 |
| H  | 2.500895  | -0.441579 | -2.375458 |
| H  | 3.918915  | 3.162782  | 0.902242  |
| H  | 1.033682  | -1.529222 | -2.747110 |
| H  | 0.995928  | -2.391814 | -0.516253 |
| H  | 2.444905  | 1.197984  | 0.948947  |
| H  | 3.854211  | 4.751283  | -1.015876 |
| H  | 2.236253  | 4.342558  | -2.882802 |
| H  | 1.584687  | -2.385719 | 1.808250  |
| H  | 3.340116  | -2.259570 | 3.551107  |
| H  | 5.575393  | -1.321133 | 2.995617  |
| H  | 6.038979  | -0.518262 | 0.690209  |
| H  | 4.287722  | -0.631950 | -1.040837 |
| S  | -1.394488 | 1.419996  | 0.291438  |
| O  | -1.104792 | 2.809733  | 0.768341  |
| C  | -1.976592 | 0.429528  | 1.687884  |
| C  | -2.895624 | 1.441658  | -0.712755 |
| H  | -2.213569 | -0.572839 | 1.324690  |
| H  | -1.161963 | 0.398444  | 2.415046  |
| H  | -2.847403 | 0.928641  | 2.122918  |

|   |           |          |           |
|---|-----------|----------|-----------|
| H | -2.664915 | 2.008859 | -1.616760 |
| H | -3.162760 | 0.414020 | -0.967100 |
| H | -3.680242 | 1.940255 | -0.136184 |
| N | 0.500668  | 2.402474 | -3.065639 |
| O | 0.593395  | 3.124602 | -4.045179 |
| O | -0.389487 | 1.547239 | -2.939705 |

**TS9<sub>o-NO2</sub>**

E = -1952.574011 a.u.

|    |           |           |           |
|----|-----------|-----------|-----------|
| Pd | -0.226145 | -0.035740 | -0.045160 |
| S  | -0.910786 | -1.987845 | 1.174990  |
| F  | 3.324381  | -3.048208 | 0.281732  |
| F  | 4.364578  | -1.250793 | 0.927242  |
| F  | 4.686474  | -2.033328 | -1.069694 |
| O  | 1.671180  | -0.881031 | 0.267344  |
| O  | -2.352954 | -2.222488 | 1.521009  |
| O  | 2.632367  | -0.487291 | -1.755920 |
| C  | -0.292526 | -3.430510 | 0.278687  |
| C  | 0.083734  | -2.119453 | 2.679283  |
| C  | 2.581959  | -0.970288 | -0.633449 |
| C  | 3.765654  | -1.833940 | -0.127173 |
| H  | 0.789840  | -3.344156 | 0.165070  |
| H  | -0.572292 | -4.323974 | 0.845027  |
| H  | -0.782308 | -3.429882 | -0.697123 |
| H  | 1.130987  | -1.961468 | 2.411051  |
| H  | -0.261628 | -1.336430 | 3.358233  |
| H  | -0.083413 | -3.103721 | 3.126279  |
| C  | -2.385380 | 1.596438  | 0.993732  |
| C  | -3.241623 | 0.060290  | -0.630151 |
| C  | -3.647433 | 1.683777  | 1.571053  |
| H  | -1.567328 | 2.180042  | 1.407383  |
| C  | -4.520632 | 0.177559  | -0.090891 |
| C  | -4.724867 | 0.987063  | 1.018746  |
| H  | -3.794714 | 2.309511  | 2.447473  |
| H  | -5.328083 | -0.392745 | -0.535523 |
| H  | -5.715654 | 1.065602  | 1.455824  |
| C  | -2.133696 | 0.770786  | -0.122765 |
| C  | 1.085092  | 2.675737  | -0.504986 |

|   |           |           |           |
|---|-----------|-----------|-----------|
| C | -1.059359 | 1.648341  | -1.470443 |
| C | 0.451388  | 3.743575  | 0.156394  |
| C | 2.491743  | 2.629842  | -0.495363 |
| H | -1.393462 | 1.116222  | -2.355947 |
| H | -1.583214 | 2.584978  | -1.303129 |
| C | 1.194576  | 4.714811  | 0.818627  |
| H | -0.631707 | 3.833999  | 0.141147  |
| C | 3.232348  | 3.603978  | 0.164261  |
| H | 2.992139  | 1.816325  | -1.013658 |
| C | 2.588186  | 4.647894  | 0.829591  |
| H | 0.684338  | 5.534509  | 1.318843  |
| H | 4.317505  | 3.549271  | 0.157397  |
| H | 3.166915  | 5.410789  | 1.344382  |
| C | 0.357111  | 1.624153  | -1.234572 |
| H | 0.966314  | 1.044468  | -1.929777 |
| N | -3.083158 | -0.873086 | -1.743847 |
| O | -4.091377 | -1.264598 | -2.314276 |
| O | -1.940106 | -1.220971 | -2.052277 |

**styrene**

E = -309.522460 a.u.

|   |           |           |           |
|---|-----------|-----------|-----------|
| C | -3.022030 | -1.319234 | 1.414617  |
| C | -3.061670 | -0.885374 | 0.078647  |
| C | -4.056287 | 0.036075  | -0.284259 |
| C | -4.977940 | 0.509122  | 0.646597  |
| C | -4.924022 | 0.068251  | 1.967071  |
| C | -3.940635 | -0.848654 | 2.345391  |
| C | -2.116748 | -1.349067 | -0.946541 |
| C | -1.109047 | -2.217222 | -0.796759 |
| H | -2.277940 | -0.919947 | -1.936164 |
| H | -0.874734 | -2.693707 | 0.151813  |
| H | -0.474234 | -2.483252 | -1.636842 |
| H | -4.103707 | 0.384344  | -1.314251 |
| H | -5.738387 | 1.222655  | 0.339091  |
| H | -5.640931 | 0.434307  | 2.697486  |
| H | -3.890772 | -1.198398 | 3.373687  |
| H | -2.264741 | -2.032264 | 1.729054  |

**Cartesian coordinates for all the species calculated at the B3LYP level in this study**

**10S**

E = -1510.775420 a.u.

|    |           |           |           |
|----|-----------|-----------|-----------|
| Pd | 0.045926  | -0.242385 | -0.517241 |
| S  | -0.025825 | -2.513896 | -0.174170 |
| S  | -0.336800 | 2.706114  | 0.246586  |
| F  | 4.693757  | 0.488747  | -1.000476 |
| F  | 4.521880  | -1.124647 | 0.458538  |
| F  | 4.933394  | 0.908676  | 1.120218  |
| F  | -4.937047 | -0.558169 | 1.133271  |
| F  | -4.635223 | -0.443607 | -1.015665 |
| F  | -4.291227 | 1.315065  | 0.229363  |
| O  | 2.077392  | -0.367994 | -0.441915 |
| O  | 0.138141  | 1.788690  | -0.956340 |
| O  | -1.968510 | -0.047627 | -0.648947 |
| O  | -1.223784 | -3.289591 | -0.651420 |
| O  | 2.292197  | 1.297865  | 1.096959  |
| O  | -2.308349 | -0.946209 | 1.411717  |
| C  | 1.469558  | -3.260406 | -0.912623 |
| C  | 0.249435  | -2.842973 | 1.598724  |
| C  | 2.719789  | 0.436655  | 0.340012  |
| C  | 4.246514  | 0.182200  | 0.232370  |
| C  | 0.907073  | 4.037244  | 0.226245  |
| C  | -1.760536 | 3.589249  | -0.478113 |
| C  | -2.673728 | -0.418602 | 0.370584  |
| C  | -4.164677 | -0.042005 | 0.174269  |
| H  | 2.350538  | -2.706558 | -0.586395 |
| H  | 1.489331  | -4.309808 | -0.608610 |
| H  | 1.346565  | -3.179465 | -1.994445 |
| H  | 1.183033  | -2.365173 | 1.906578  |
| H  | -0.607670 | -2.399497 | 2.106297  |

|   |           |           |           |
|---|-----------|-----------|-----------|
| H | 0.283973  | -3.927592 | 1.731706  |
| H | 0.587892  | 4.828104  | 0.911385  |
| H | 1.831493  | 3.572513  | 0.572223  |
| H | 1.008263  | 4.408891  | -0.796420 |
| H | -2.058868 | 4.396837  | 0.197513  |
| H | -1.477334 | 3.972842  | -1.461283 |
| H | -2.560778 | 2.852442  | -0.566275 |

**10O**

E = -1510.779955 a.u.

|    |           |           |           |
|----|-----------|-----------|-----------|
| Pd | -0.000070 | -0.000018 | 0.687707  |
| S  | -0.190013 | -2.754608 | -0.575699 |
| S  | 0.189970  | 2.754606  | -0.575614 |
| F  | -4.709225 | 0.093178  | 1.138407  |
| F  | -4.328149 | -1.300406 | -0.496784 |
| F  | -4.995480 | 0.727978  | -0.920105 |
| O  | -2.022465 | -0.231914 | 0.657232  |
| O  | -0.114577 | 2.041082  | 0.809711  |
| O  | 2.022325  | 0.231887  | 0.657414  |
| O  | 0.114441  | -2.041121 | 0.809667  |
| O  | -2.401807 | 1.310812  | -0.980625 |
| O  | 2.401795  | -1.310726 | -0.980523 |
| C  | -1.707913 | -3.693428 | -0.187245 |
| C  | 1.029166  | -4.107683 | -0.573513 |
| C  | -2.732525 | 0.445093  | -0.176424 |
| C  | -4.218588 | -0.000325 | -0.109970 |
| C  | -1.029098 | 4.107782  | -0.573415 |
| C  | 1.707937  | 3.693284  | -0.187078 |
| C  | 2.732442  | -0.445041 | -0.176257 |
| H  | -1.933712 | -4.368544 | -1.018652 |

|            |              |           |           |   |           |           |           |
|------------|--------------|-----------|-----------|---|-----------|-----------|-----------|
| H          | -1.560024    | -4.243065 | 0.745541  | O | -2.001273 | 0.230983  | -0.414381 |
| H          | -2.499560    | -2.950761 | -0.071389 | O | -1.282420 | -2.917450 | -1.102611 |
| H          | 0.798926     | -4.792276 | -1.395160 | O | 2.528620  | 1.102504  | 1.424929  |
| H          | 1.993538     | -3.622266 | -0.728209 | O | -2.291690 | -1.064032 | 1.425522  |
| H          | 0.988886     | -4.614404 | 0.393824  | C | 1.407791  | -2.900418 | -1.383176 |
| H          | -0.798779    | 4.792388  | -1.395029 | C | 0.225006  | -2.995187 | 1.176196  |
| H          | -1.993505    | 3.622449  | -0.728156 | C | 2.806720  | 0.347256  | 0.509437  |
| H          | -0.988802    | 4.614459  | 0.393944  | C | 4.248240  | -0.201929 | 0.345230  |
| H          | 1.933796     | 4.368439  | -1.018437 | C | -2.693535 | -0.361478 | 0.513318  |
| H          | 1.560081     | 4.242868  | 0.745744  | C | -4.205541 | -0.078849 | 0.326440  |
| H          | 2.499527     | 2.950547  | -0.071267 | H | 2.314480  | -2.515885 | -0.916860 |
| C          | 4.218491     | 0.000400  | -0.109678 | H | 1.353817  | -3.991760 | -1.363131 |
| F          | 4.995450     | -0.727842 | -0.919804 | H | 1.318429  | -2.533812 | -2.407481 |
| F          | 4.328041     | 1.300508  | -0.496411 | H | 1.163521  | -2.598769 | 1.572982  |
| F          | 4.709050     | -0.093162 | 1.138724  | H | -0.625297 | -2.671120 | 1.777249  |
| <b>1ss</b> |              |           |           | H | 0.256969  | -4.083013 | 1.071277  |
| E =        | -1510.761132 | a.u.      |           | S | -0.120015 | 2.428812  | -0.137349 |
| Pd         | 0.012916     | 0.070283  | -0.309936 | O | -0.633154 | 3.010475  | 1.152101  |
| S          | -0.061492    | -2.289518 | -0.483526 | C | 1.425211  | 3.282386  | -0.602064 |
| F          | 4.766063     | 0.148930  | -0.847571 | H | 2.130609  | 3.078464  | 0.203512  |
| F          | 4.229218     | -1.559849 | 0.401145  | H | 1.786665  | 2.881815  | -1.552935 |
| F          | 5.060901     | 0.238383  | 1.305543  | H | 1.199951  | 4.349614  | -0.671320 |
| F          | -4.916262    | -0.521820 | 1.366171  | C | -1.225139 | 2.960753  | -1.490914 |
| F          | -4.658211    | -0.682512 | -0.788595 | H | -2.180867 | 2.467785  | -1.309670 |
| F          | -4.426079    | 1.248214  | 0.196834  | H | -1.317704 | 4.047998  | -1.427747 |
| O          | 2.039412     | -0.119237 | -0.428998 | H | -0.804060 | 2.643350  | -2.448999 |
